# Supplementary material for: Profiling the tuneable R-SMS-Phos structure in the rhodium(i)-catalyzed hydrogenation of olefins: the last stand?
Source: Royal Society of Chemistry journal article supplement (doi:10.1039/c1ob05364g), 2011-01-01

Supporting Information

**Profiling the Tuneable R-SMS-Phos Structure in the Rhodium(I)-Catalyzed Hydrogenation of Olefins: The Last Stand?**

Michel Stephan,<sup>\*a,b</sup> Damjan Šterk,<sup>a</sup> Borut Zupančič<sup>a</sup> and Barbara Mohar<sup>a</sup>

<sup>a</sup> National Institute of Chemistry, Hajdrihova 19, SI-1001 Ljubljana, Slovenia

<sup>b</sup> PhosPhoenix SARL, 115, rue de l'Abbé Groult, F-75015 Paris, France  
Fax: +33 1 48283011; e-mail: mstephan@phosphoenix.com

**<sup>1</sup>H, <sup>13</sup>C NMR Spectra**

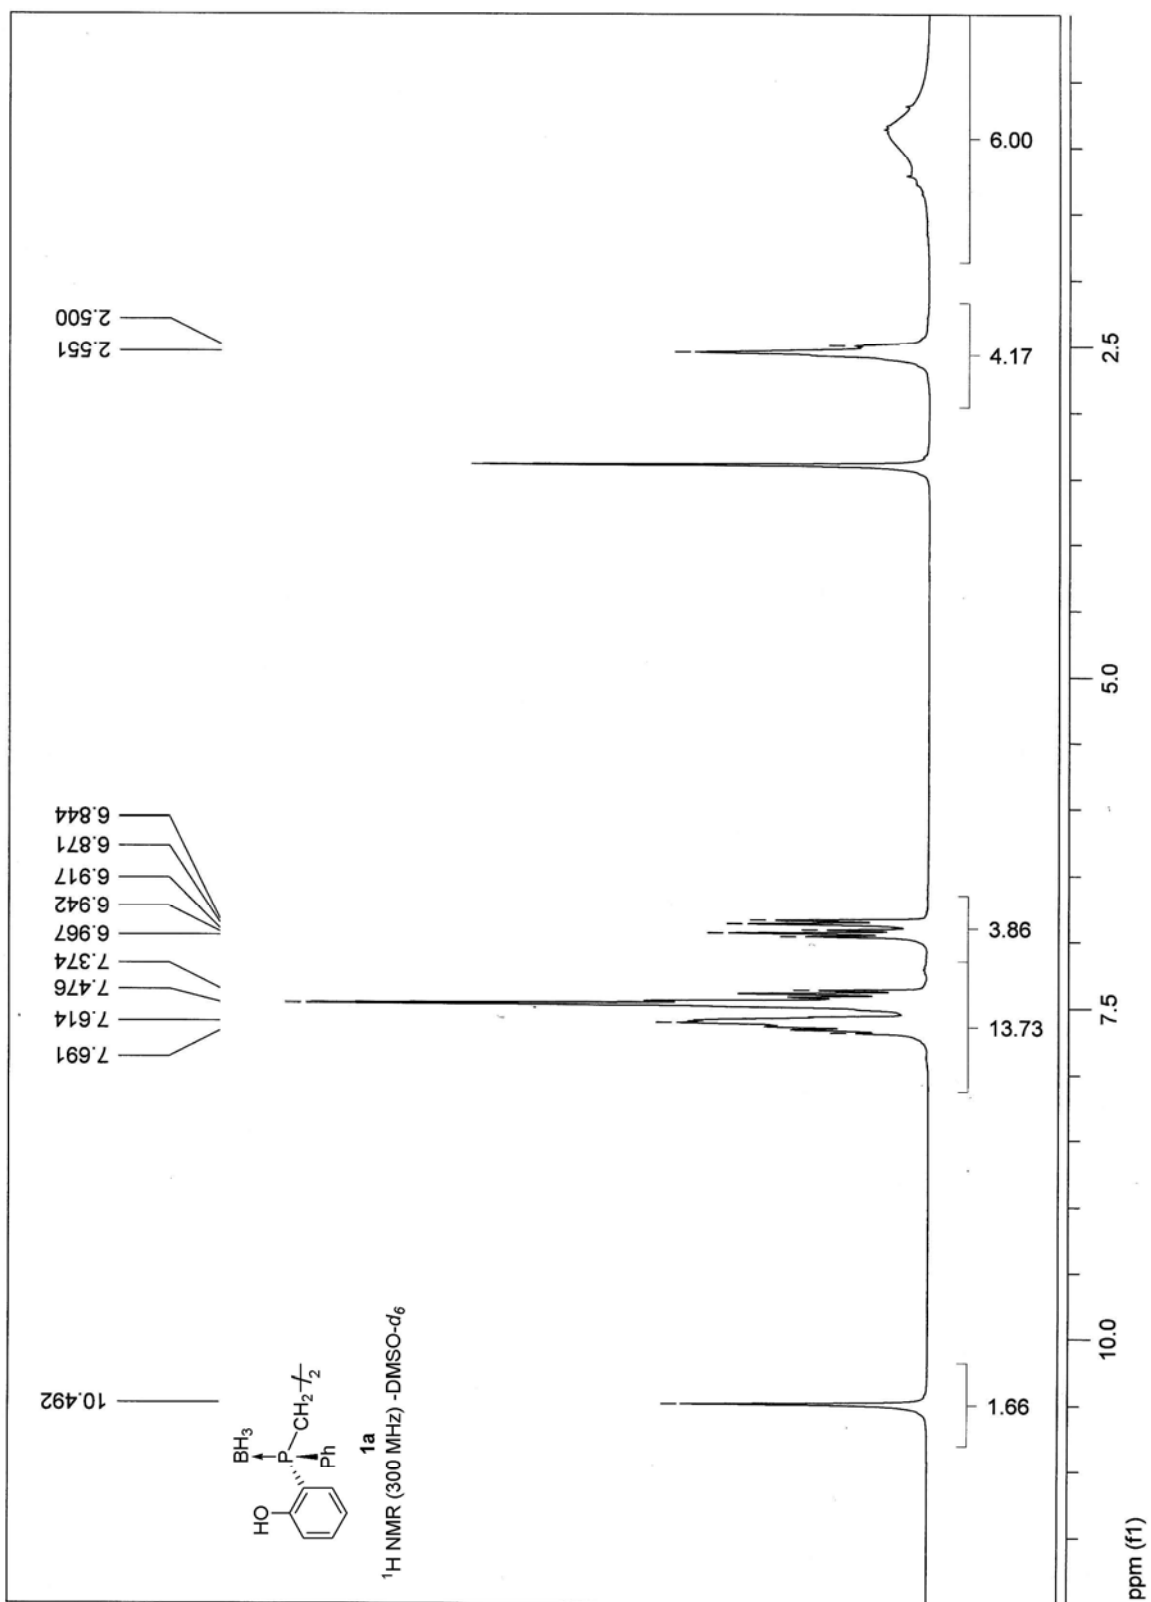

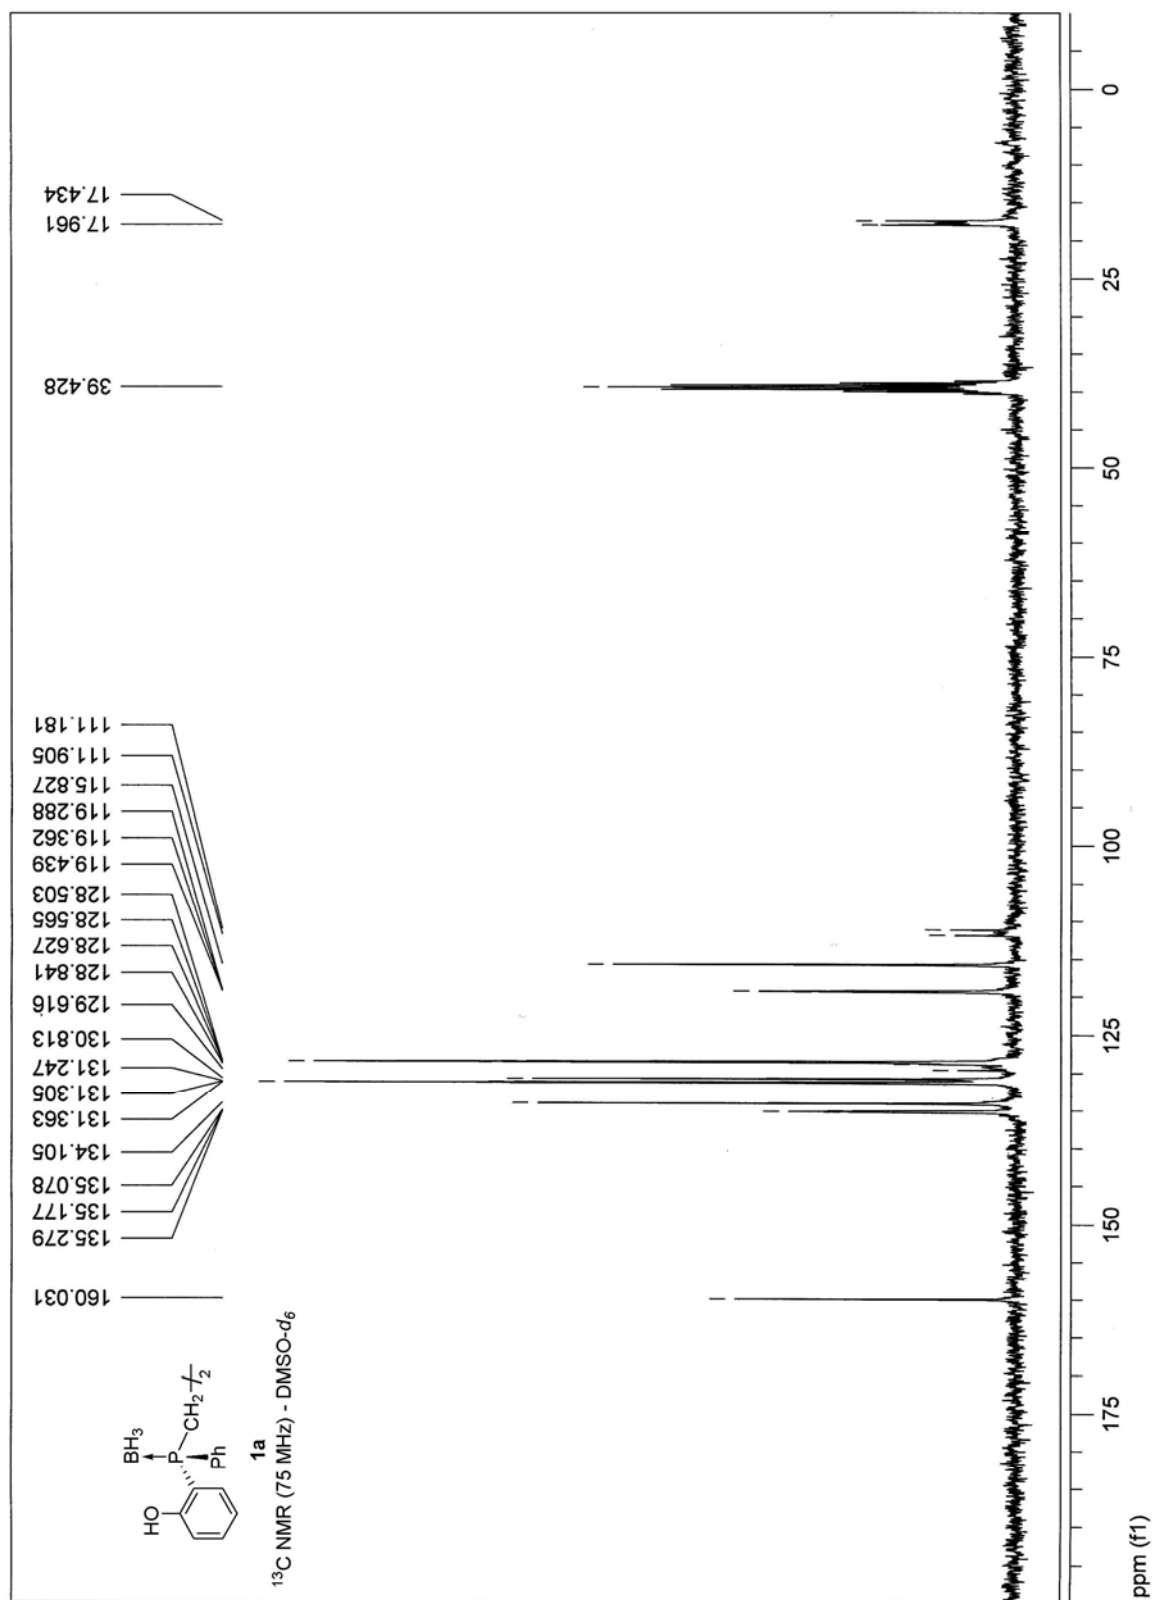

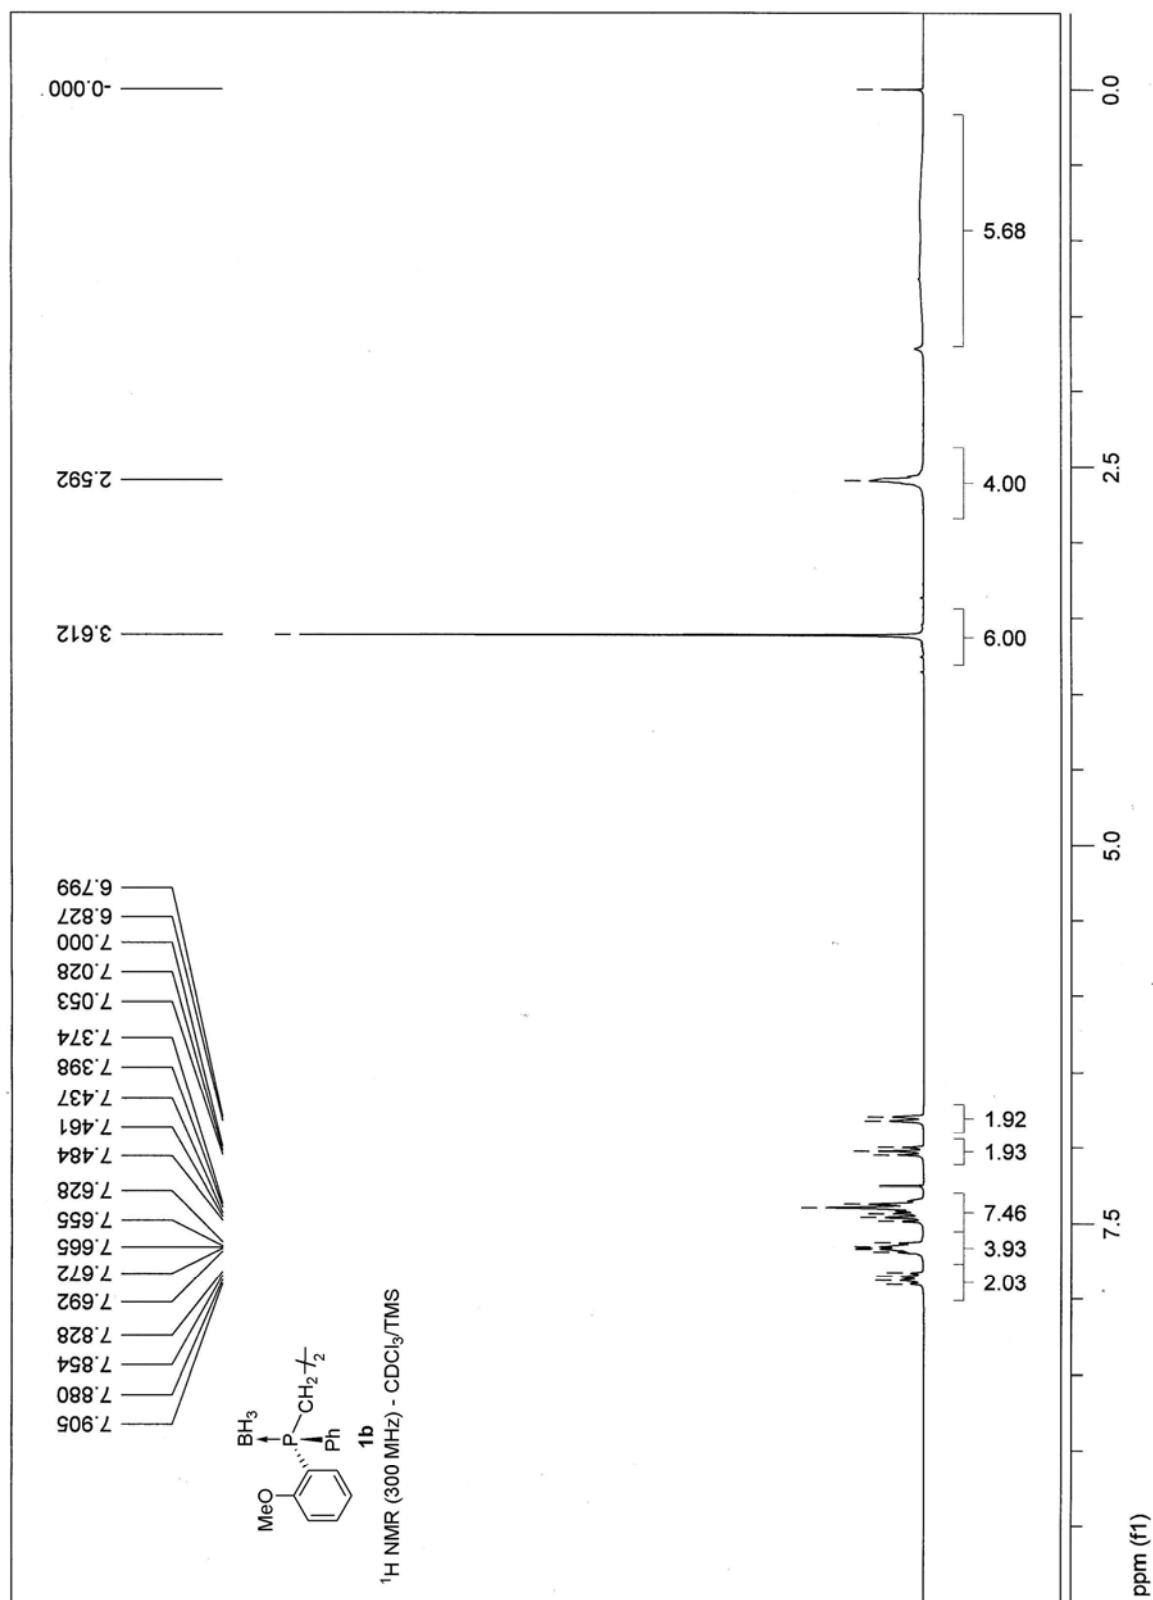

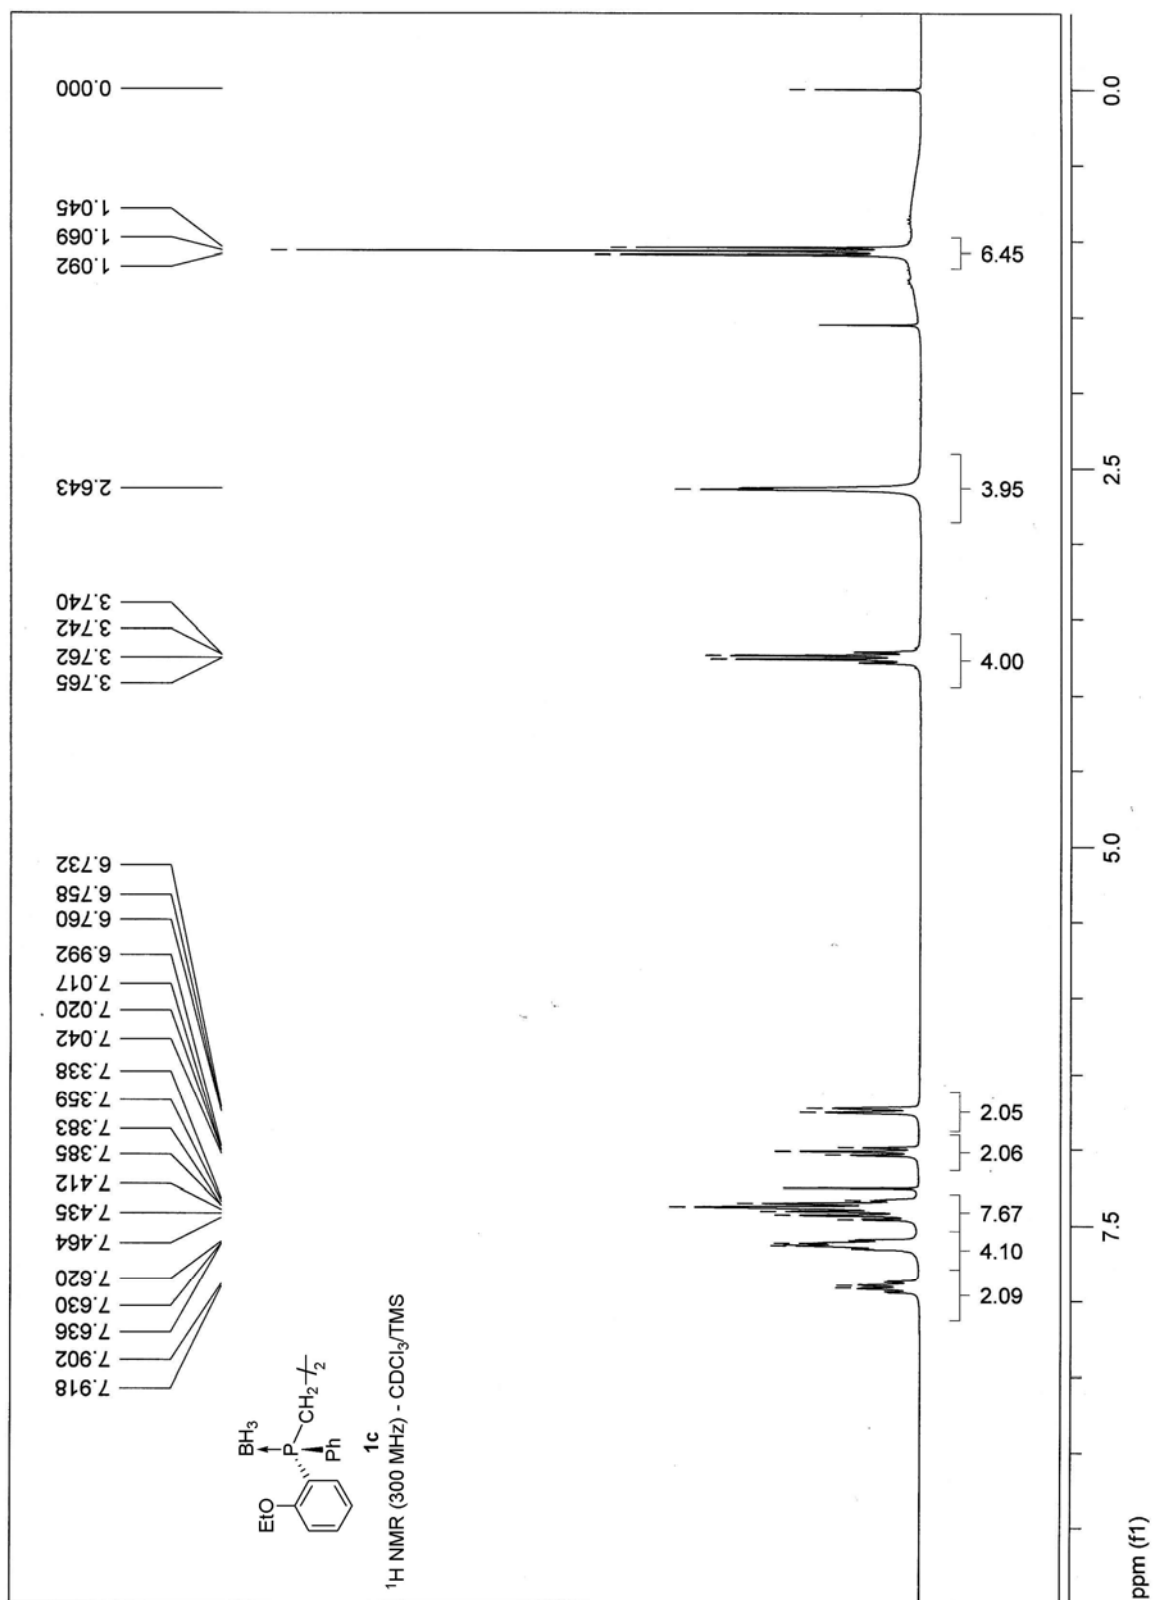

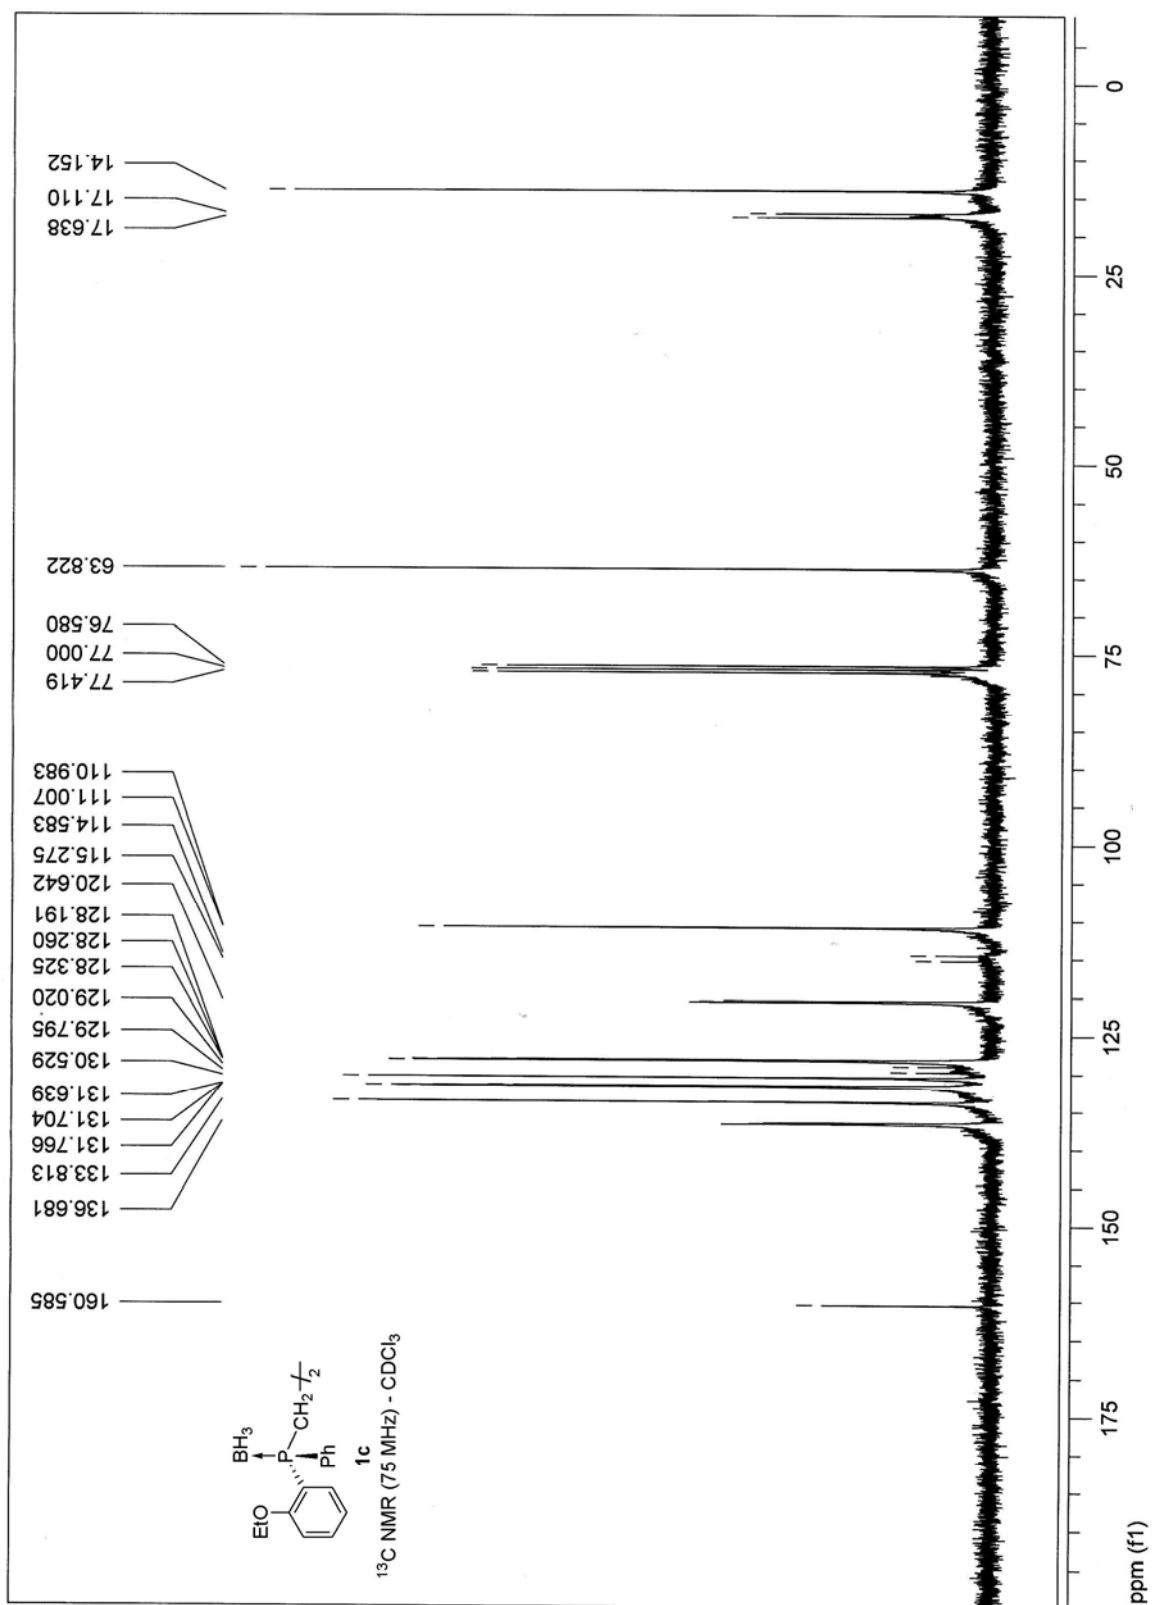

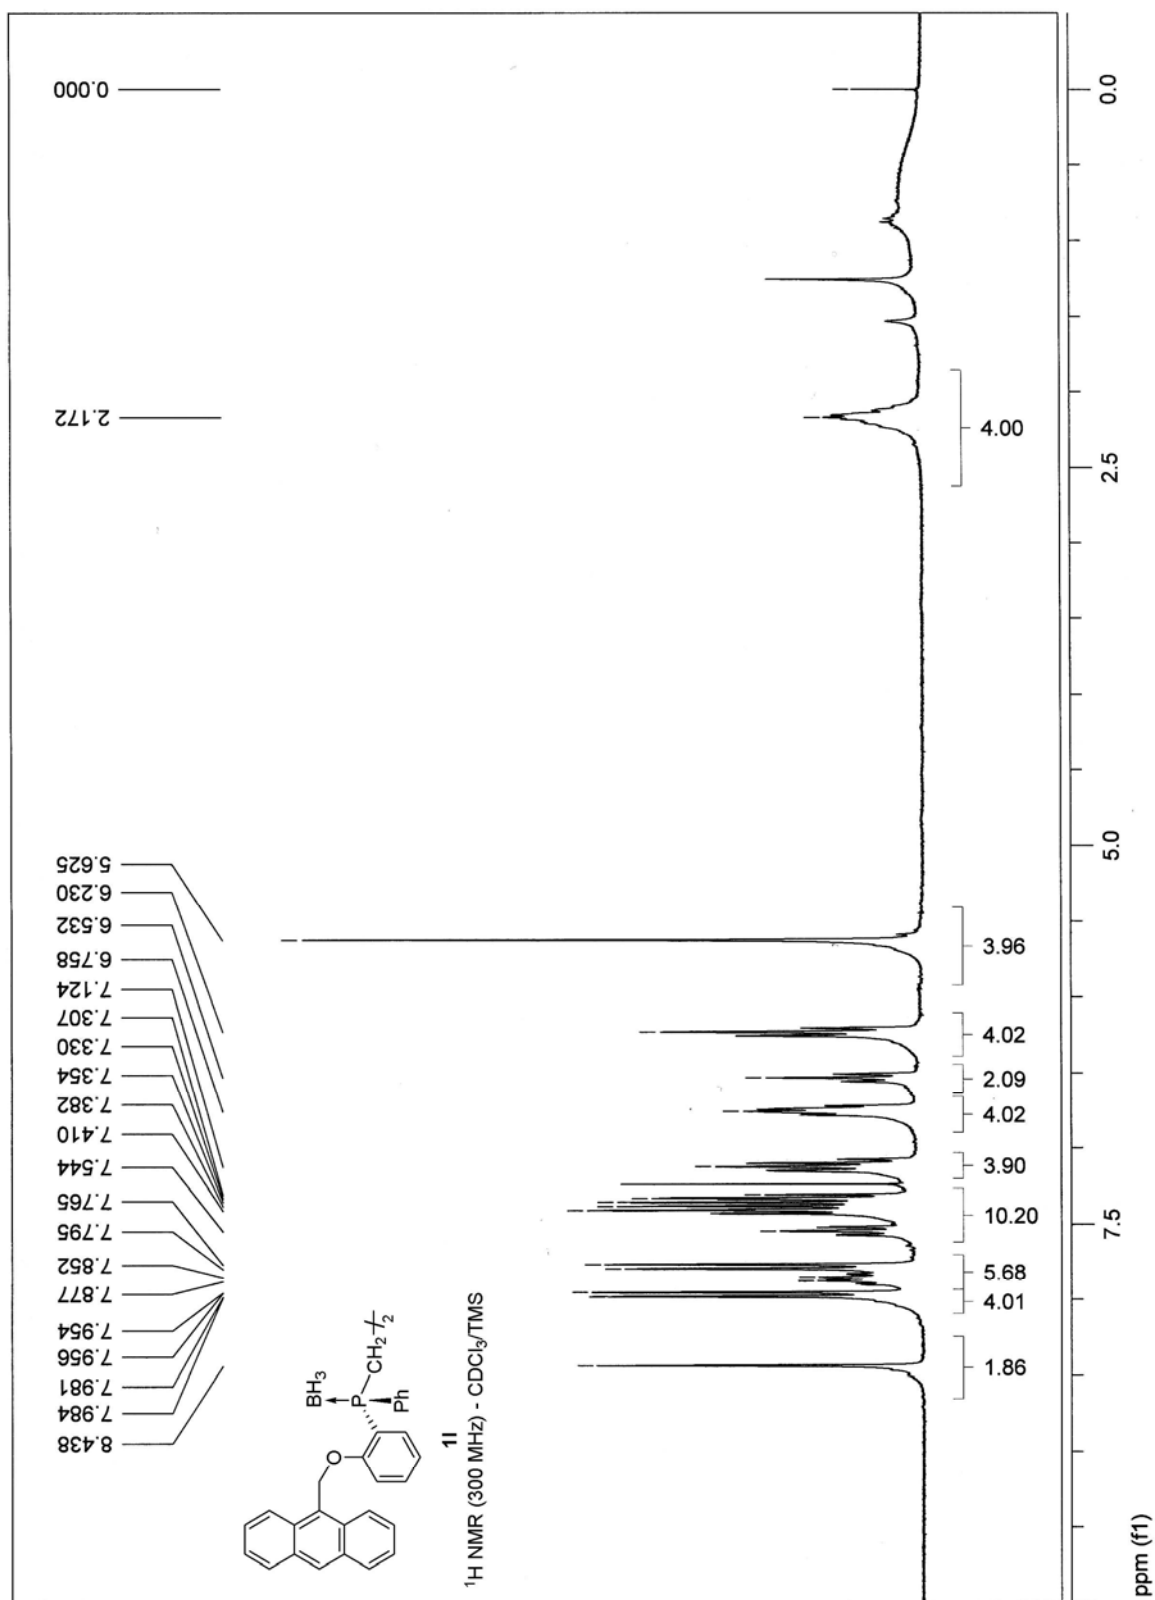

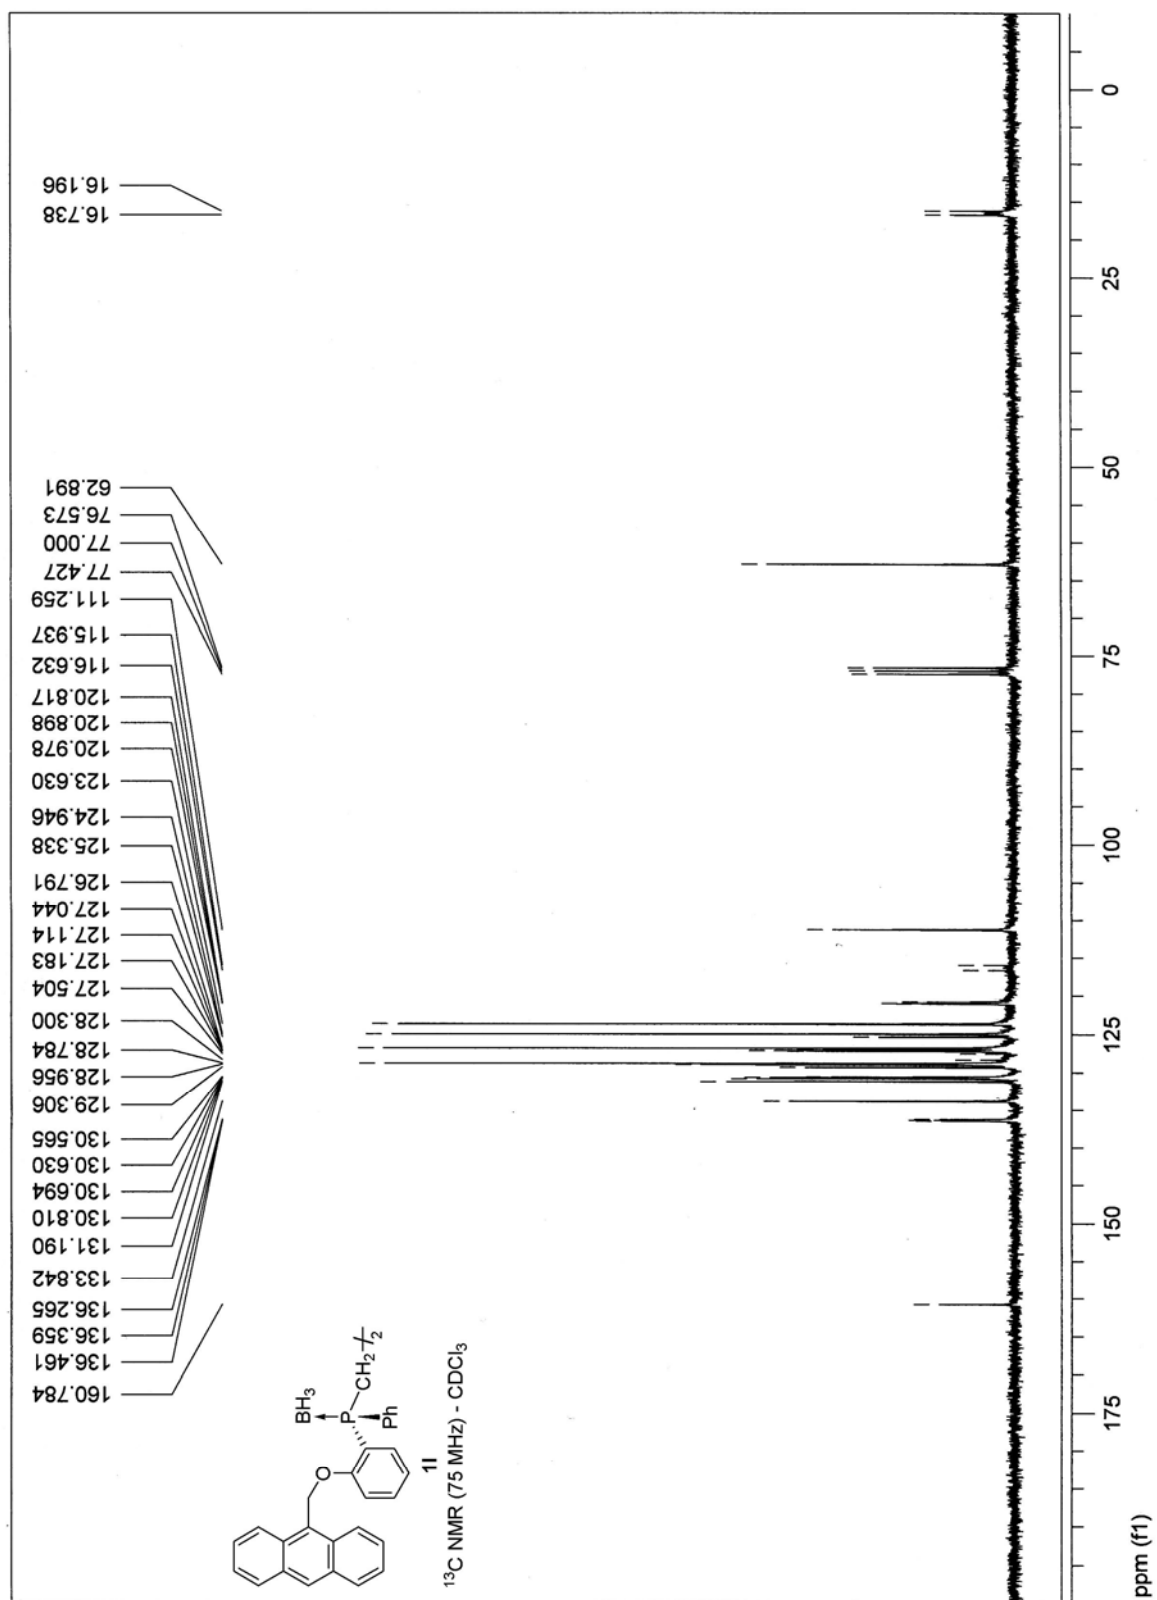



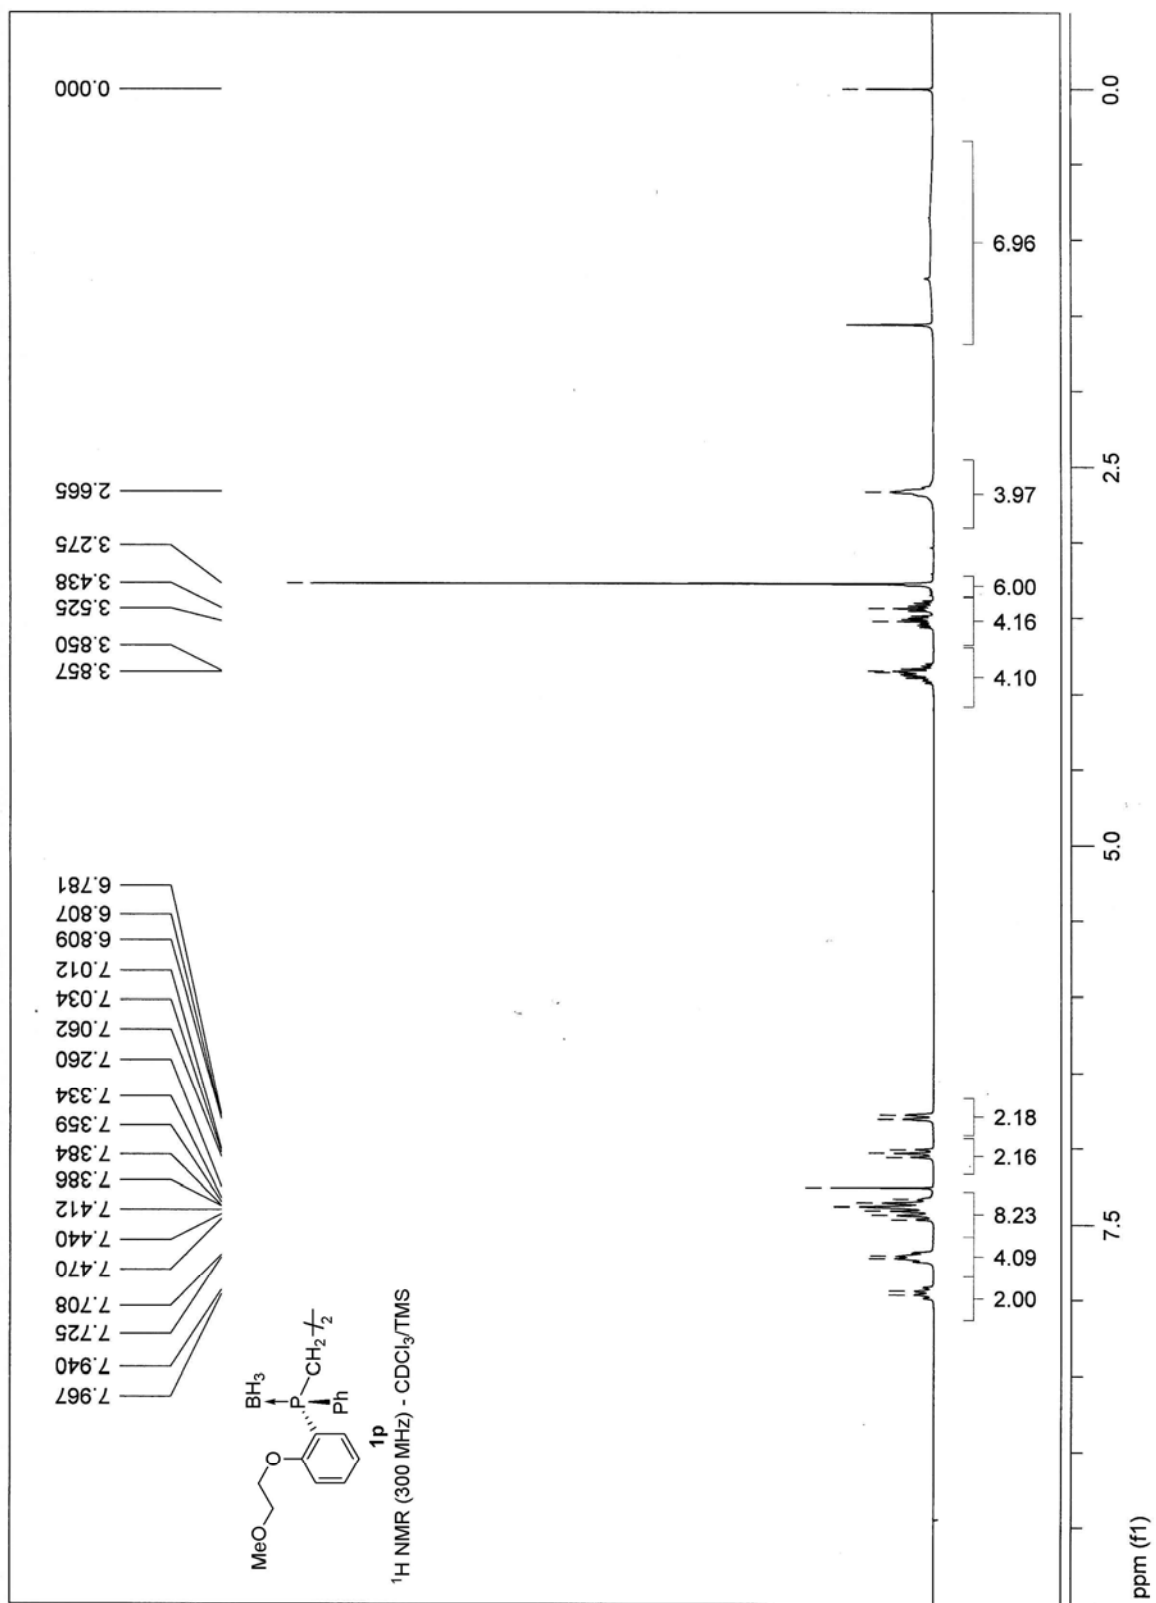

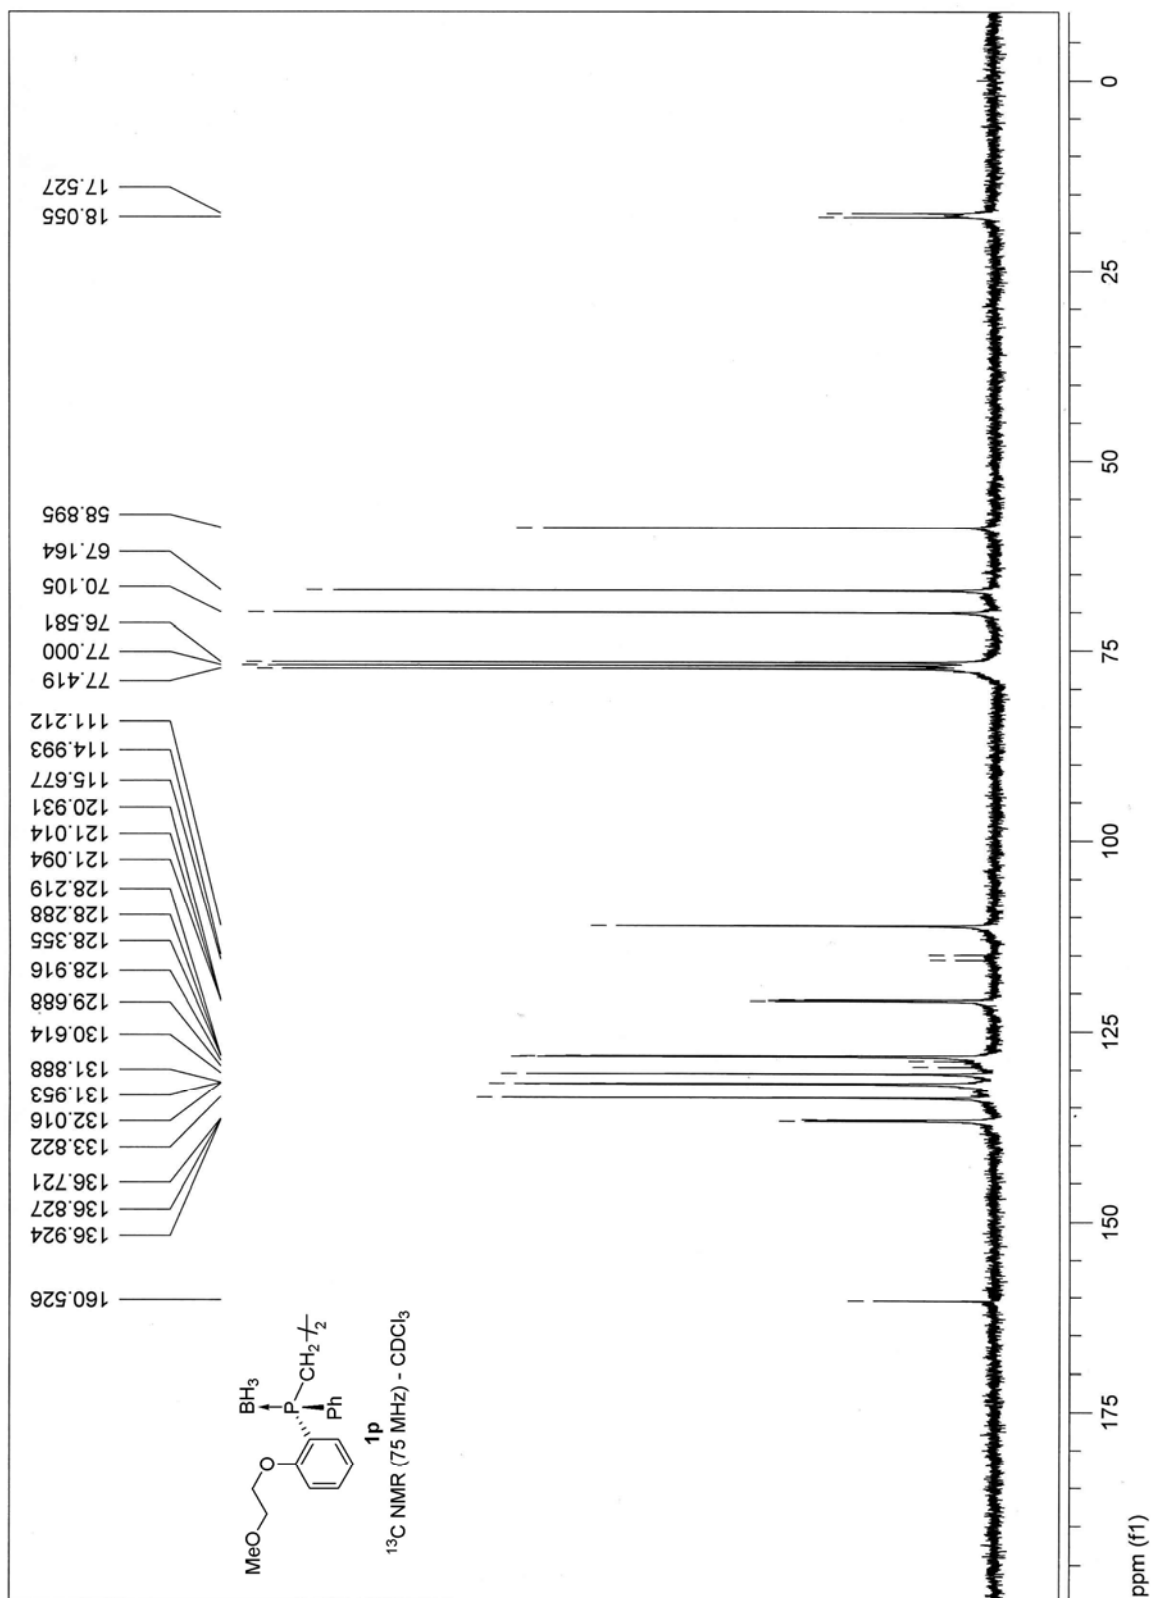

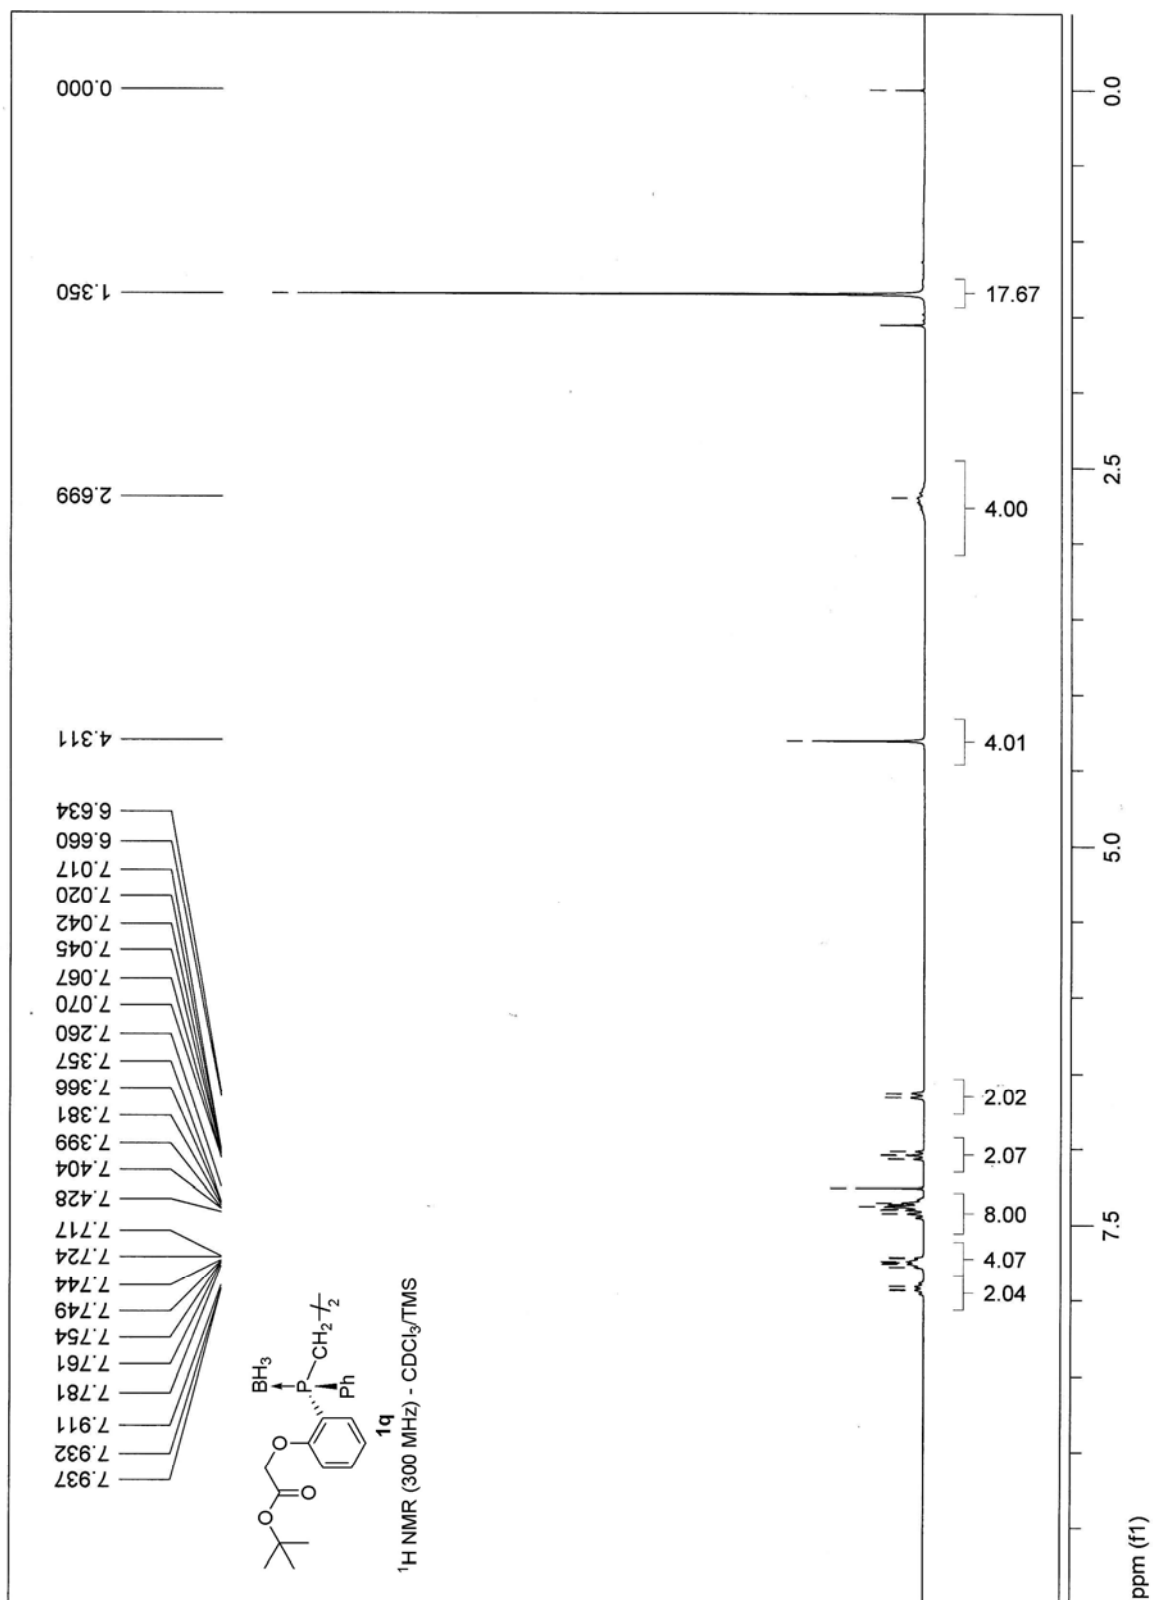

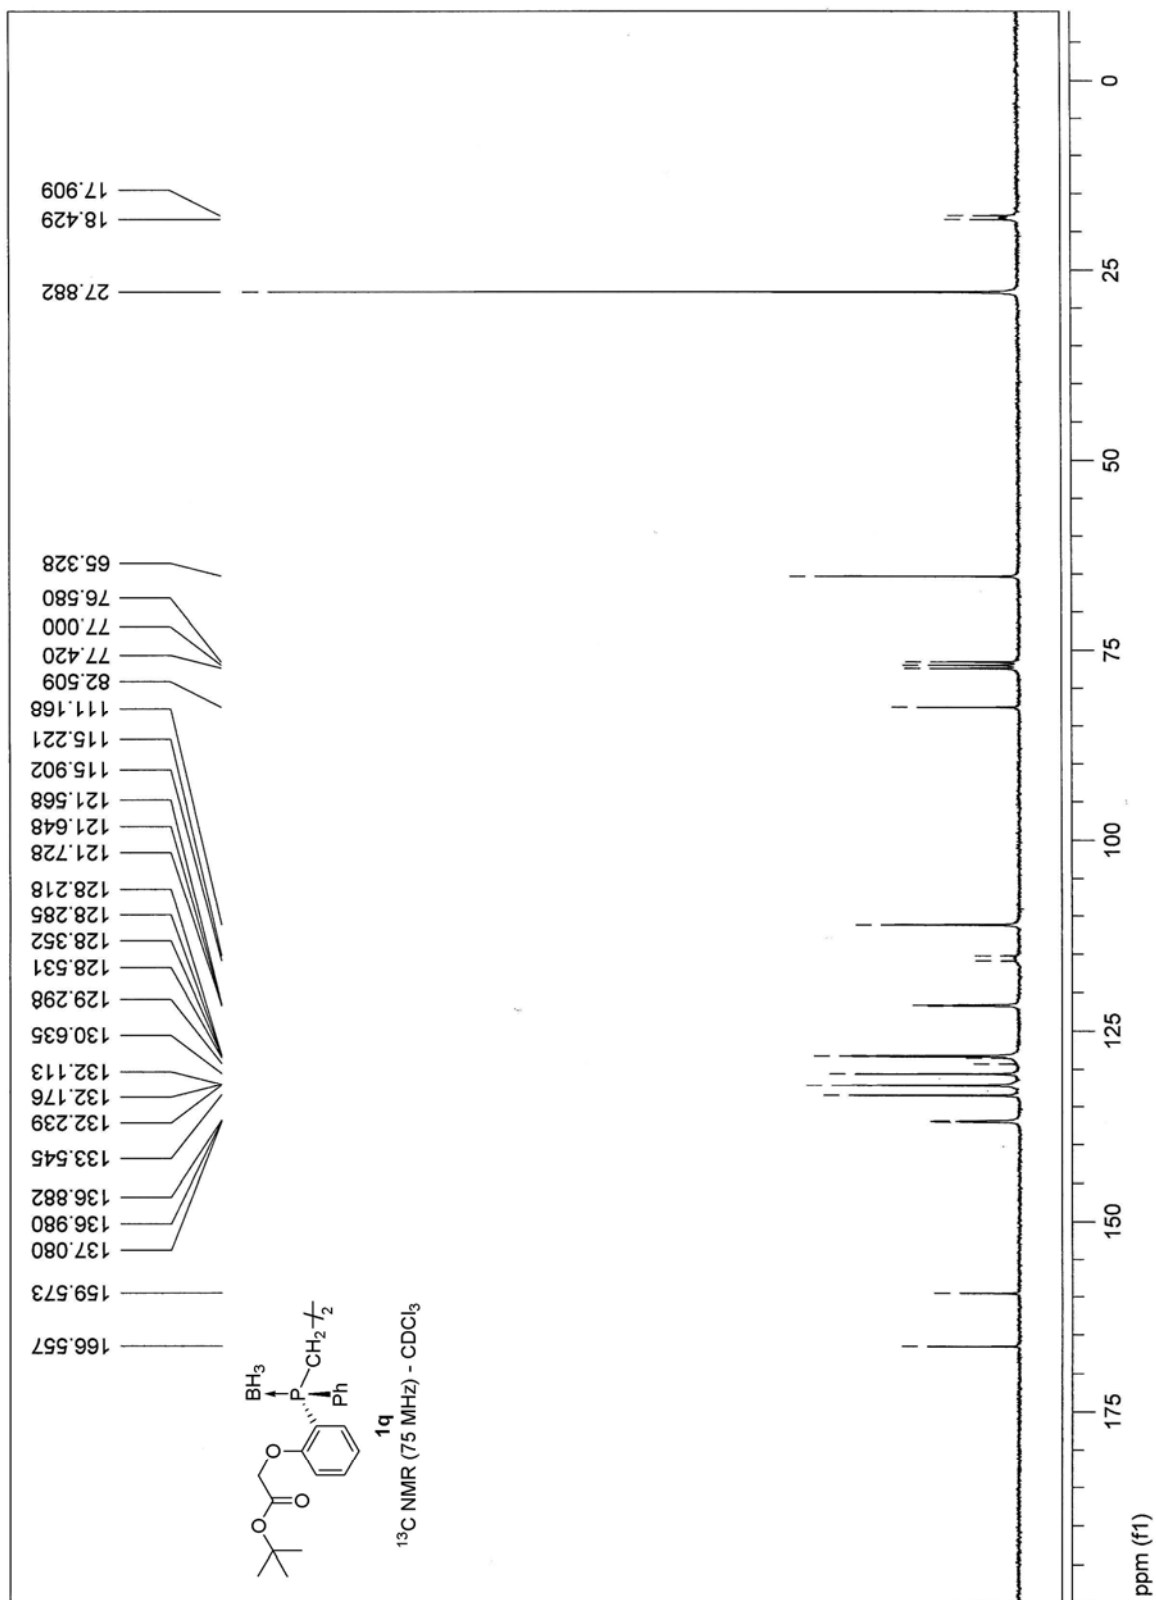

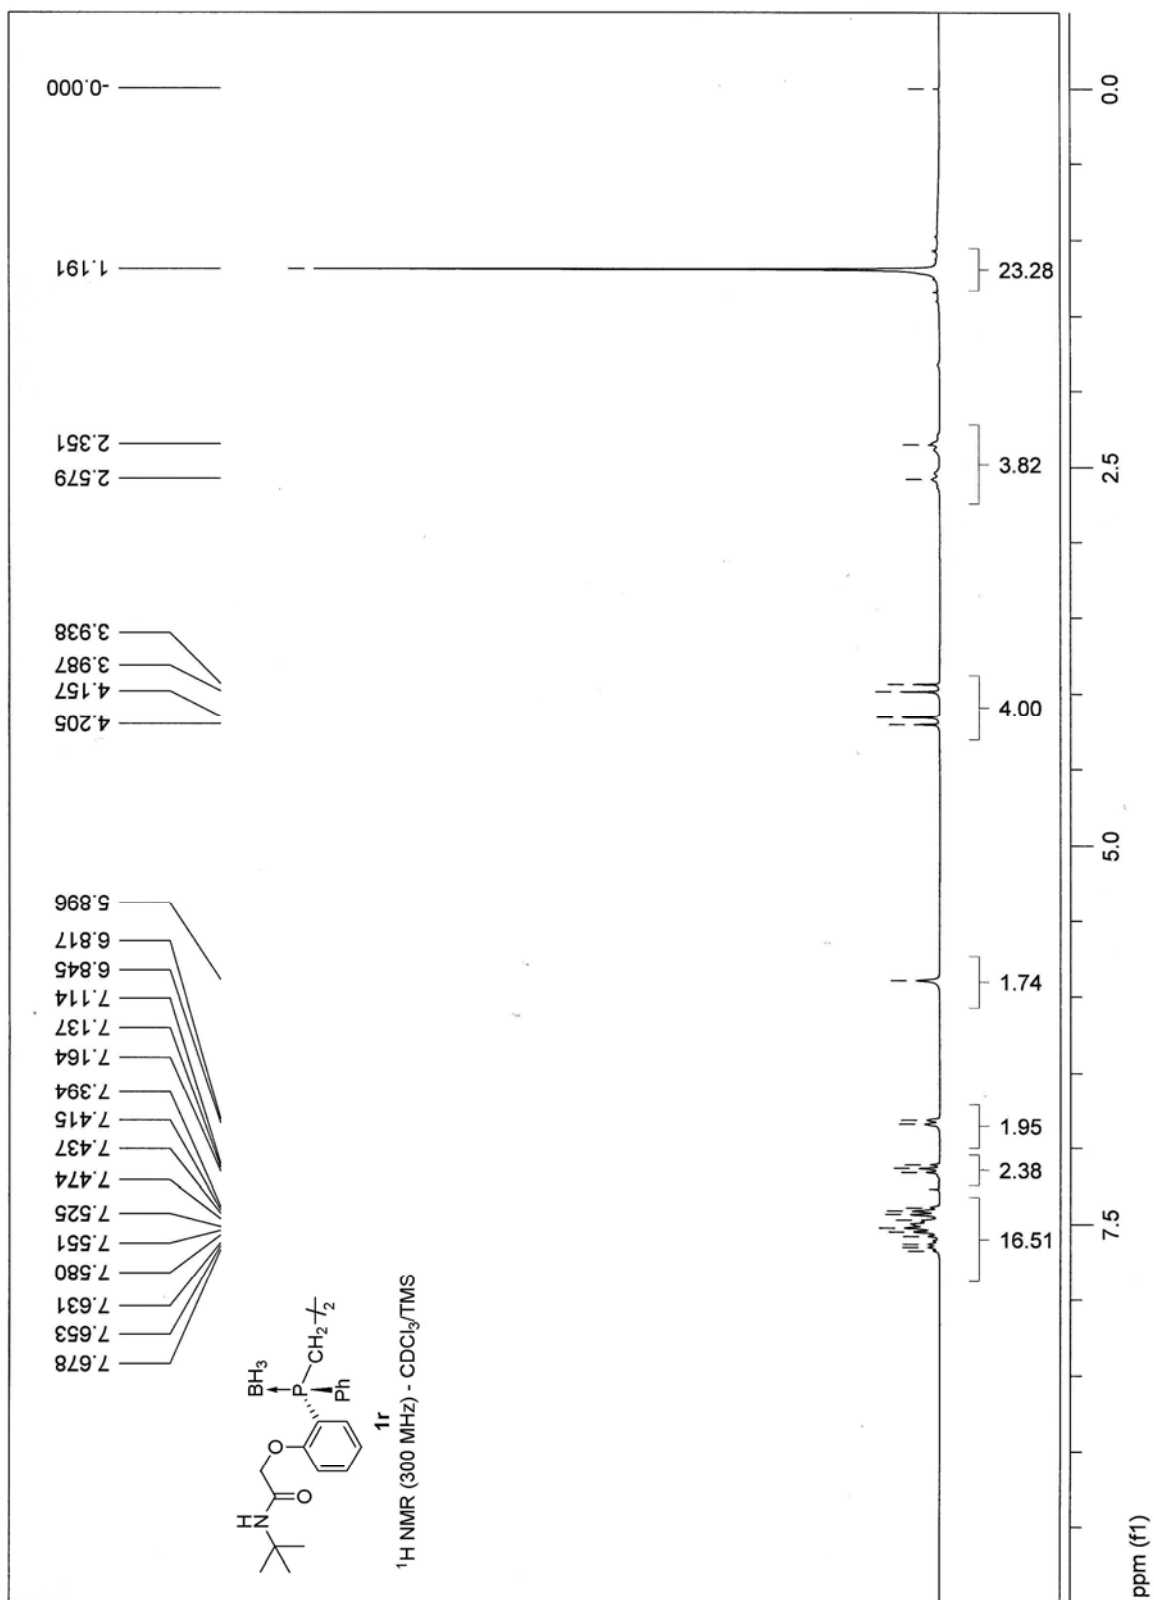

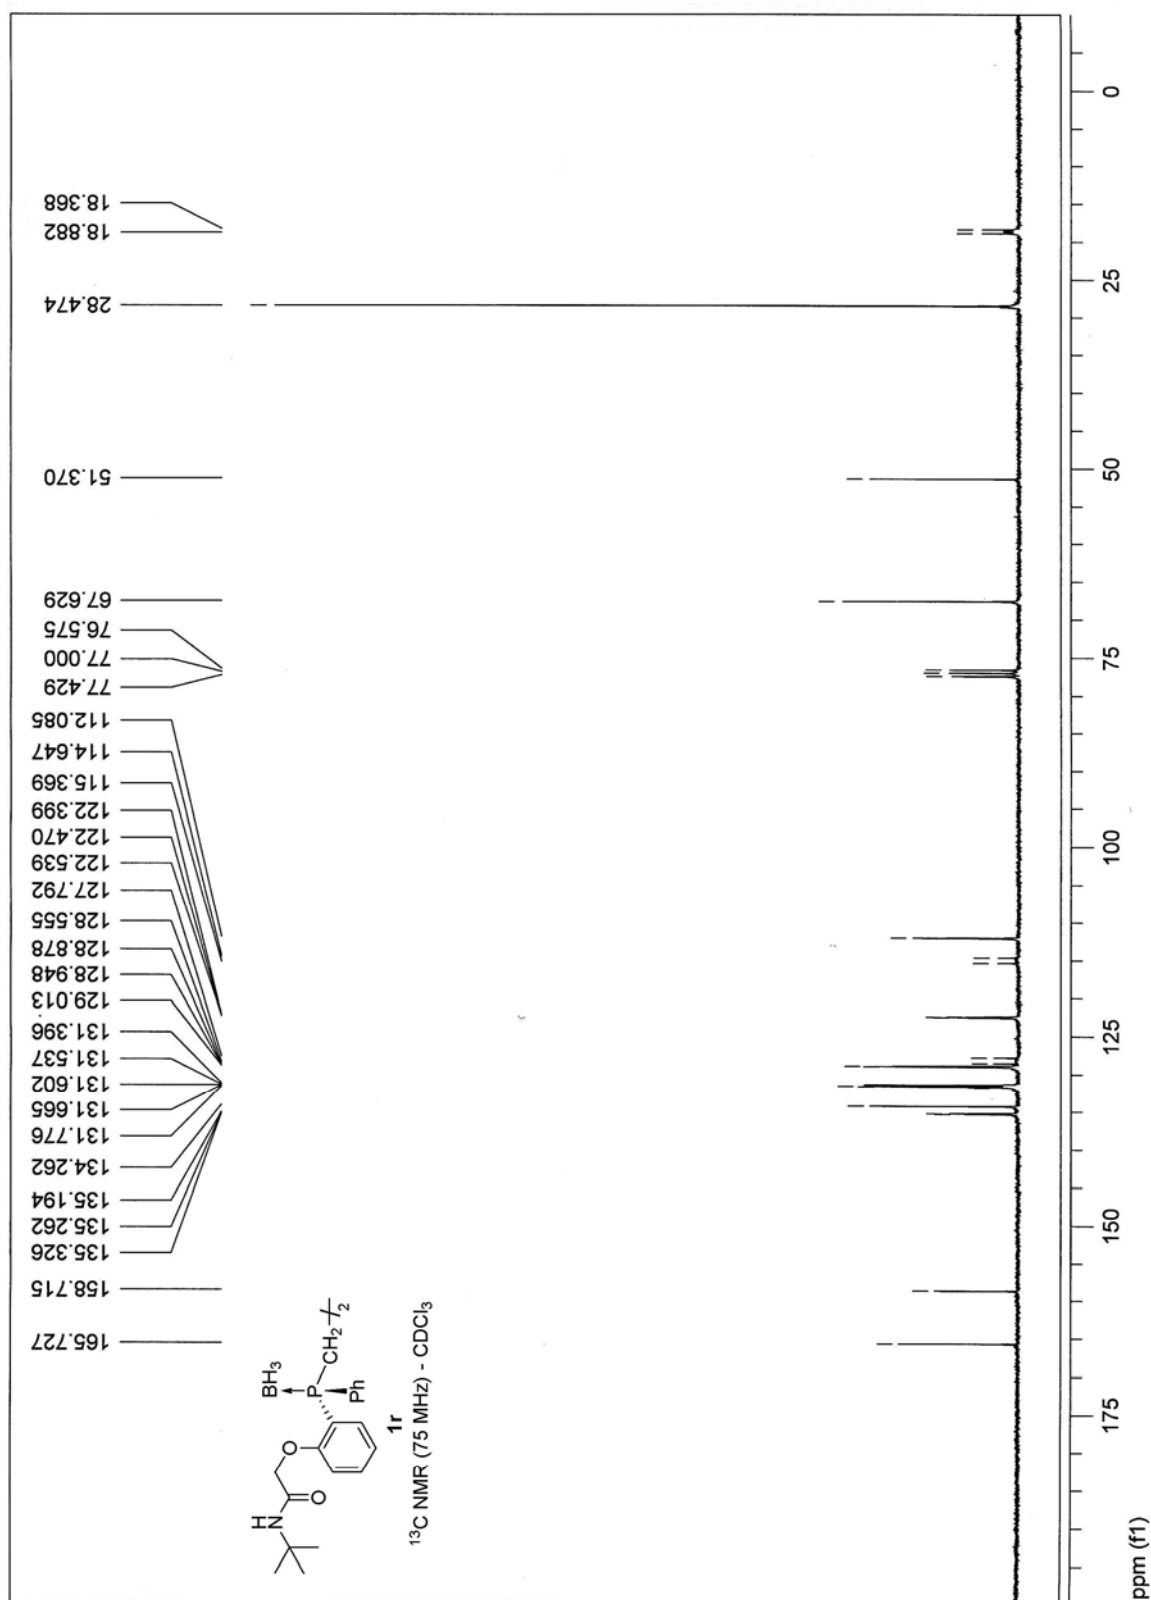

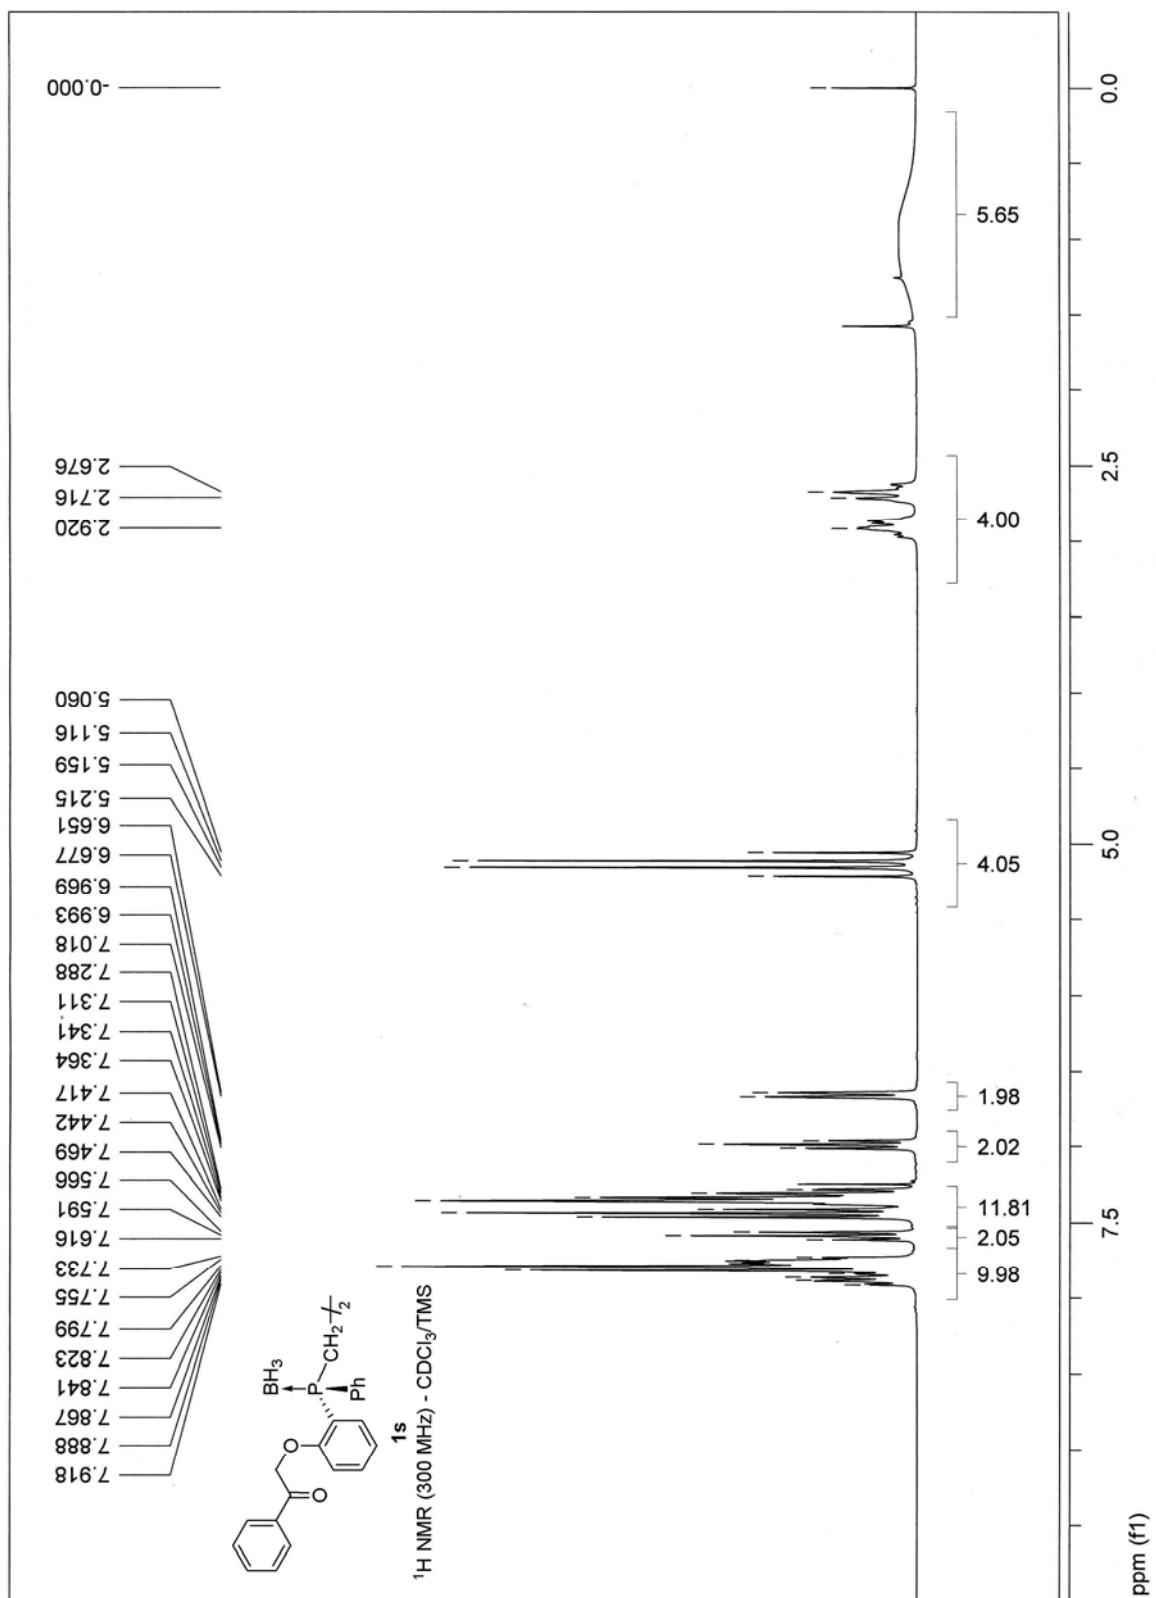

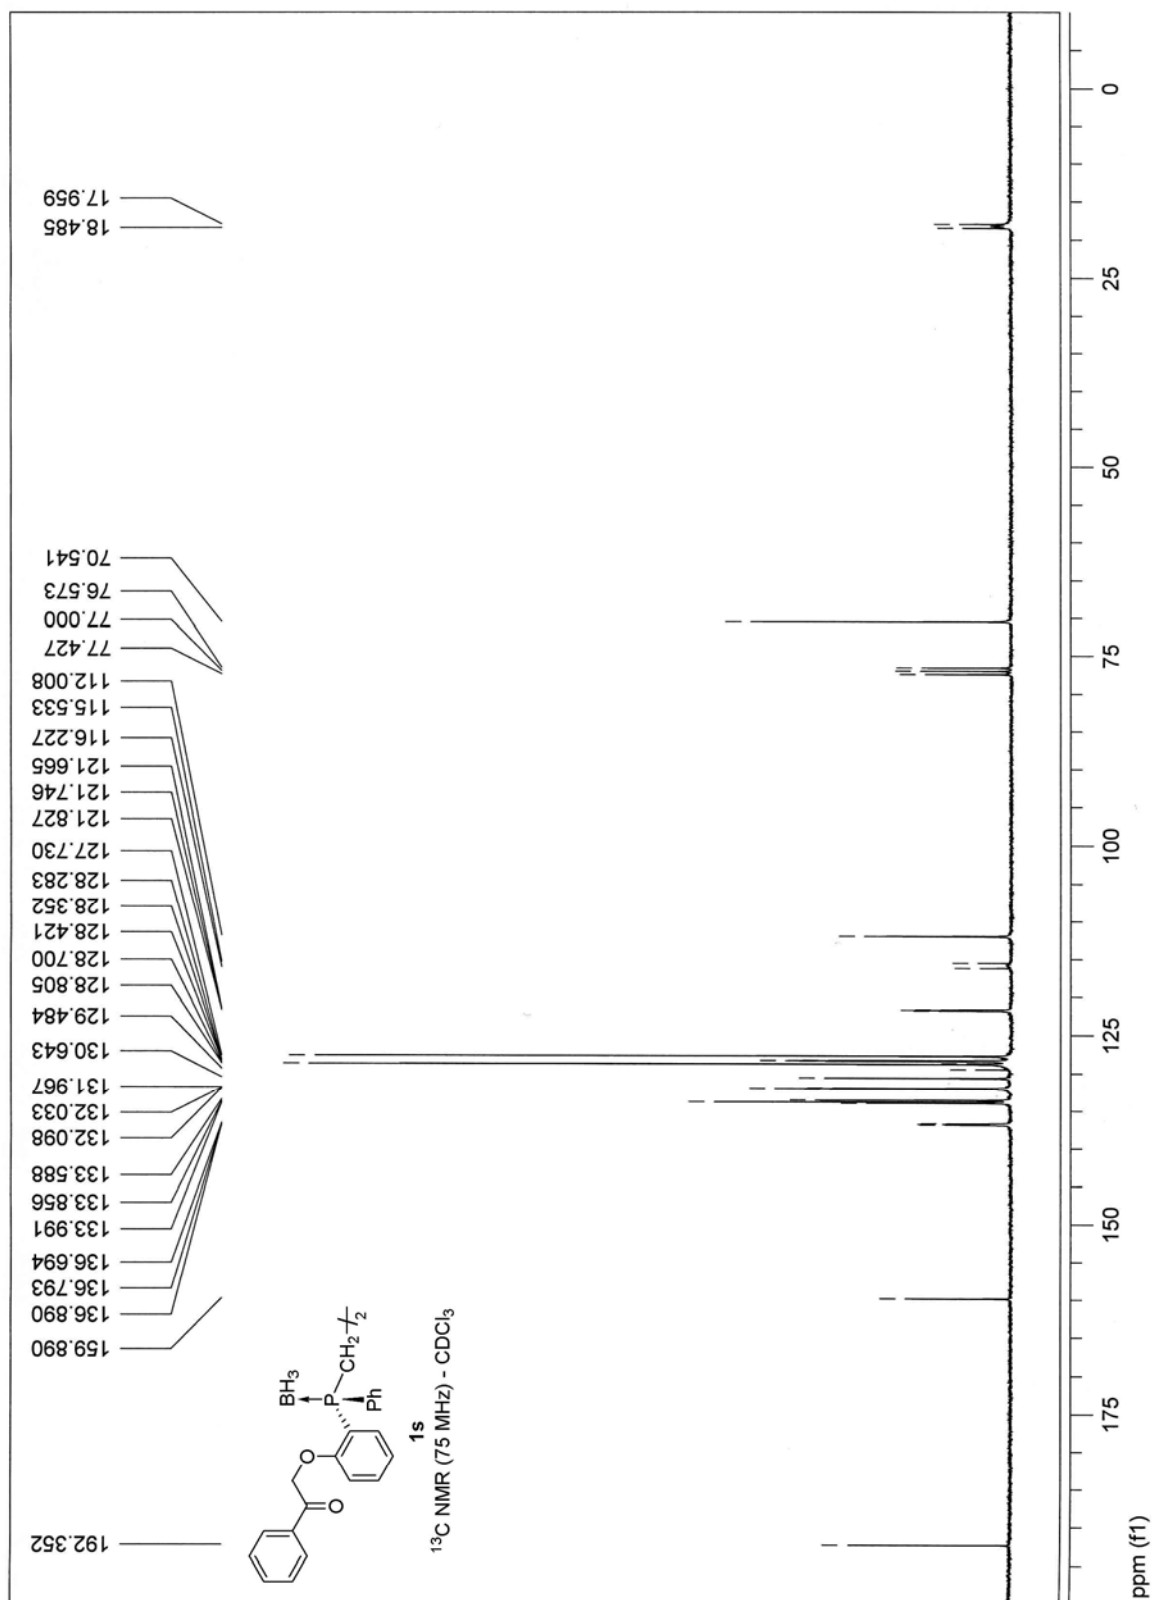



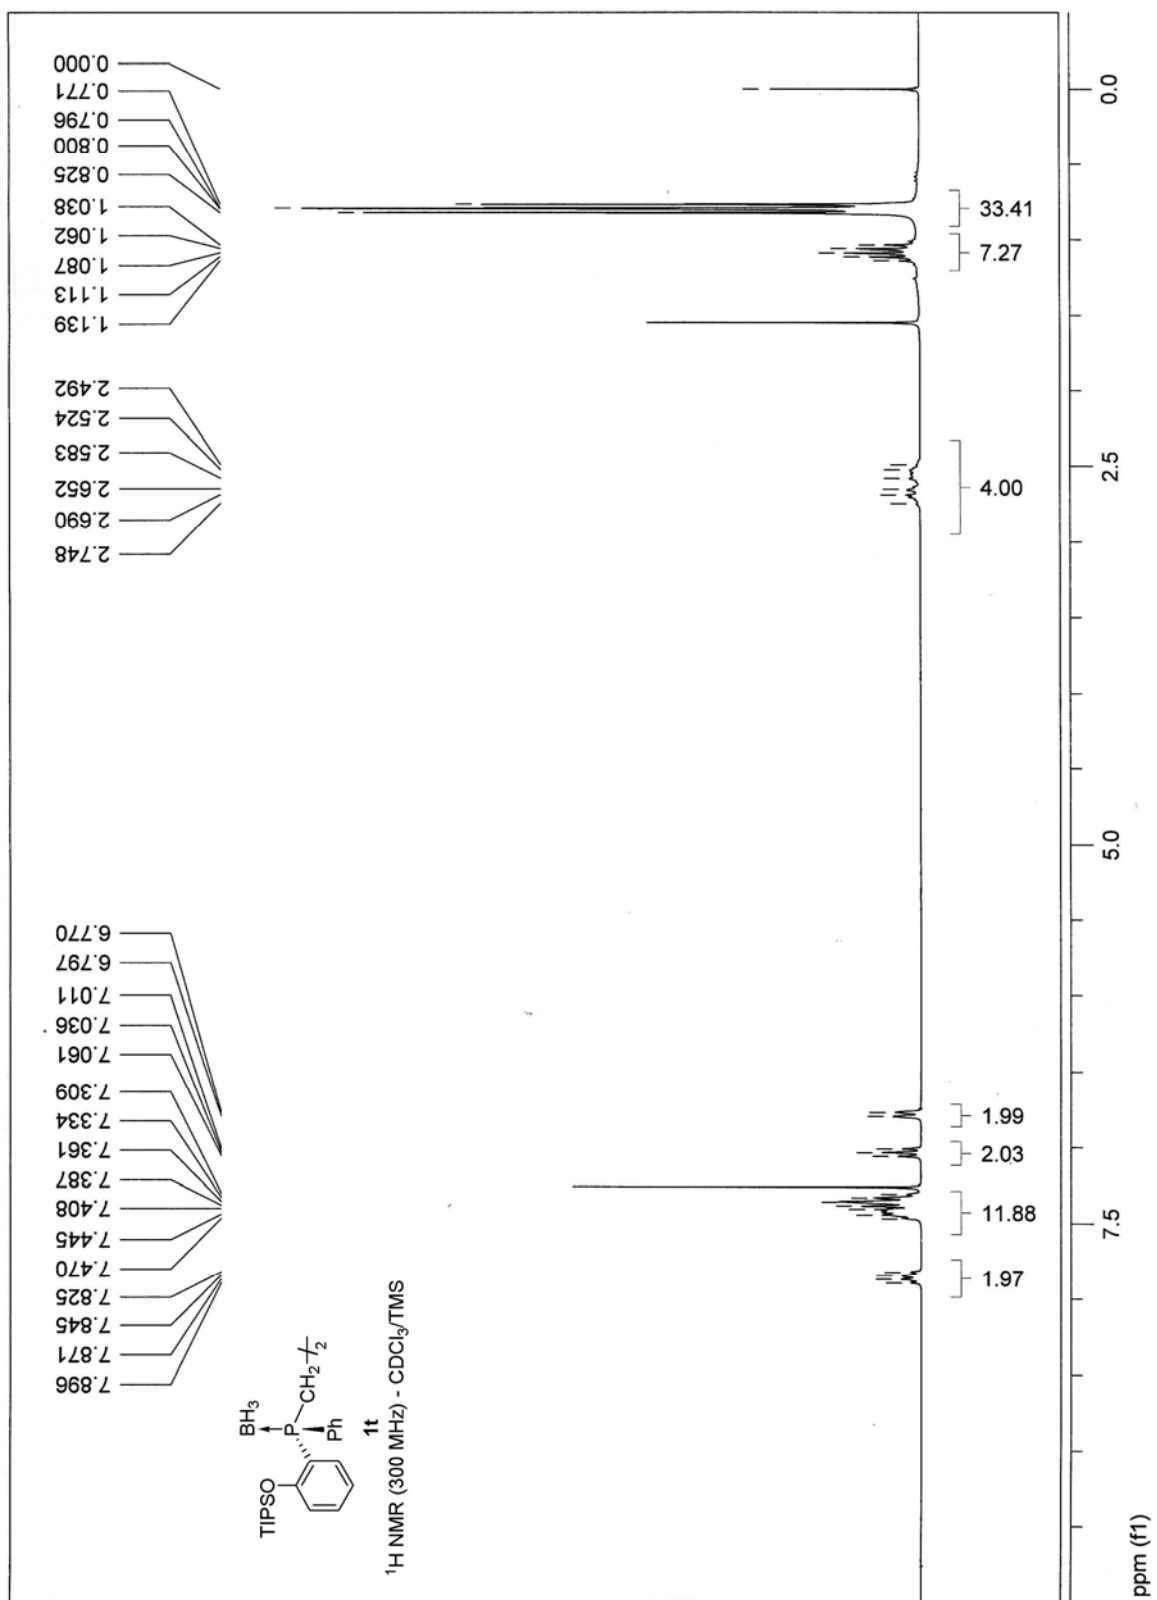

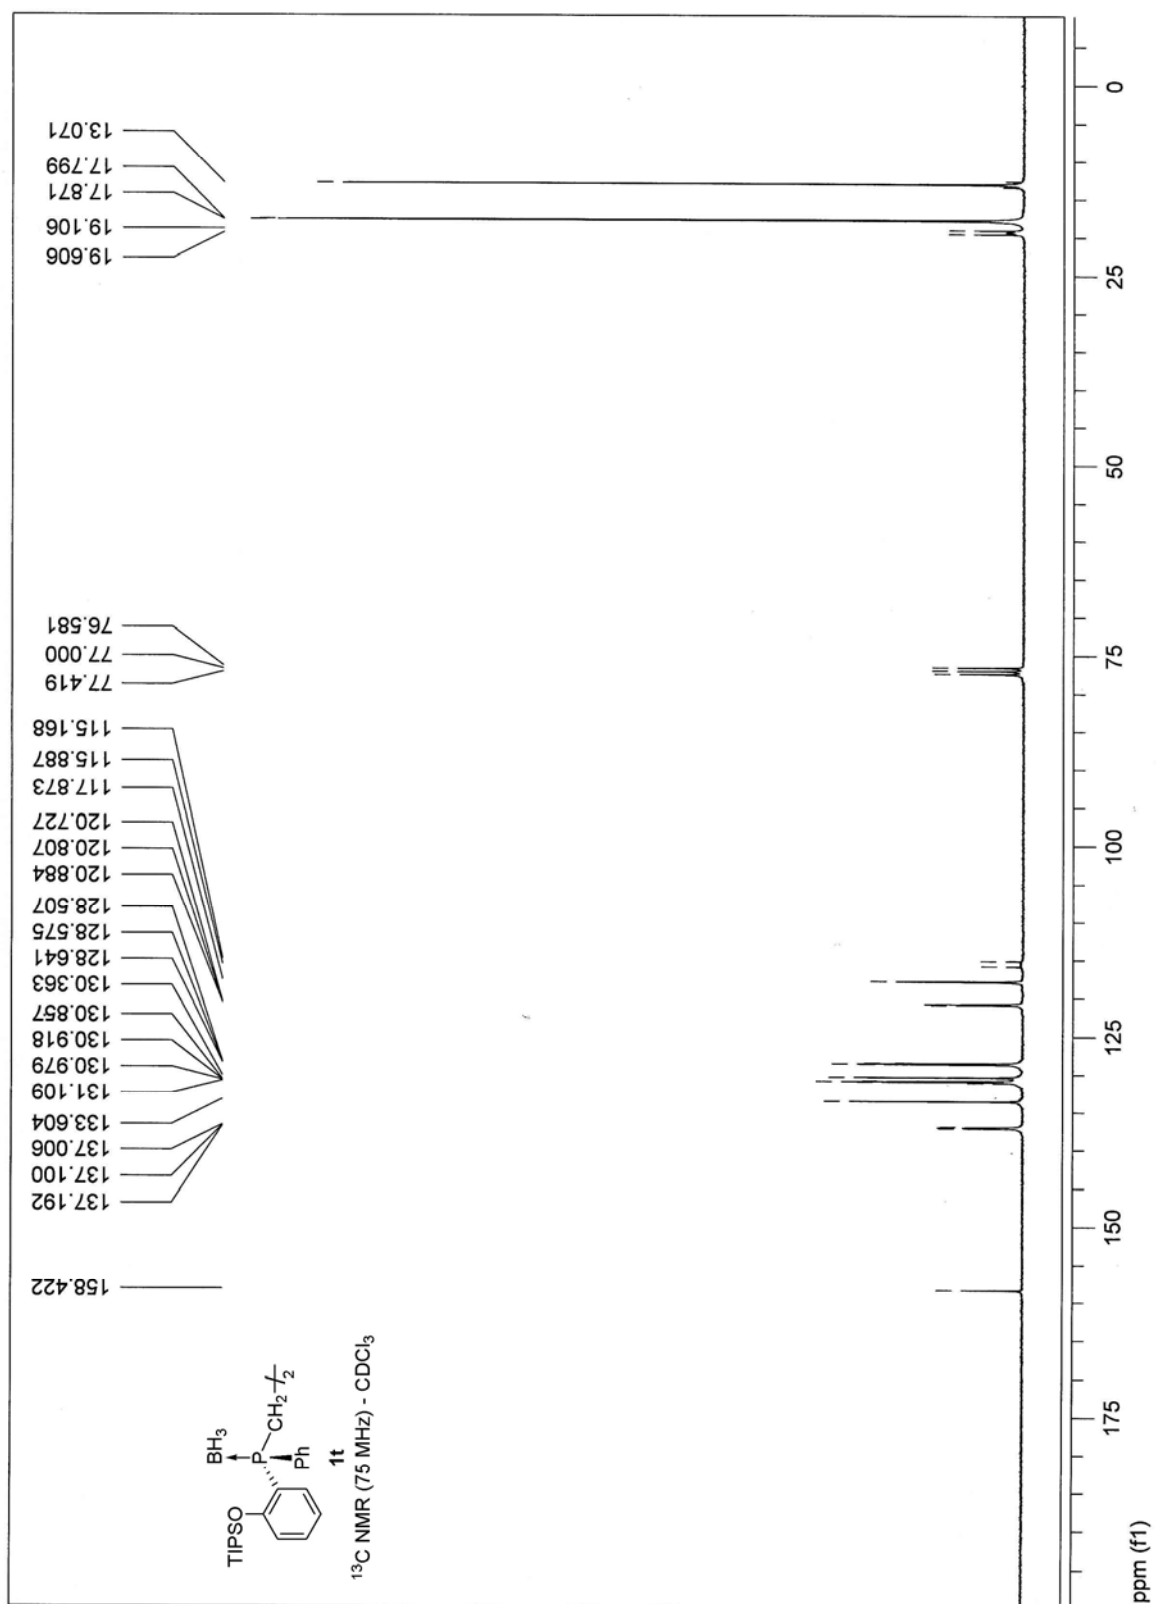

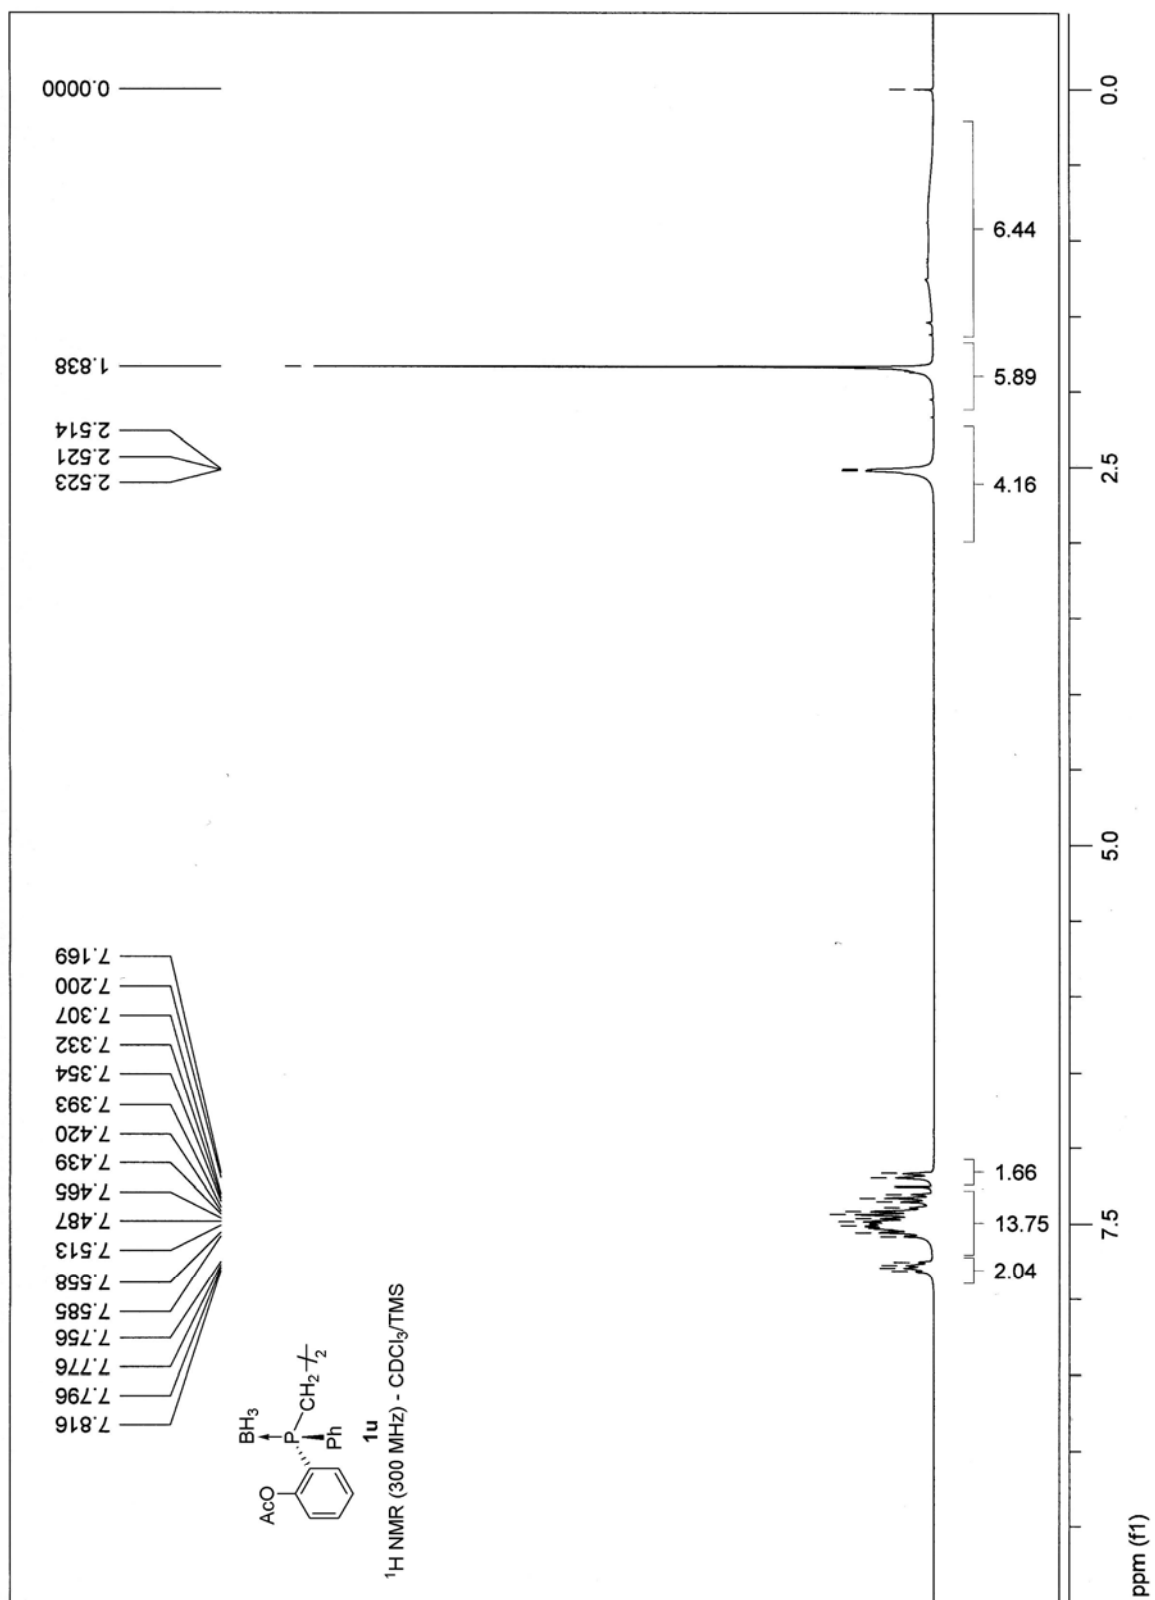

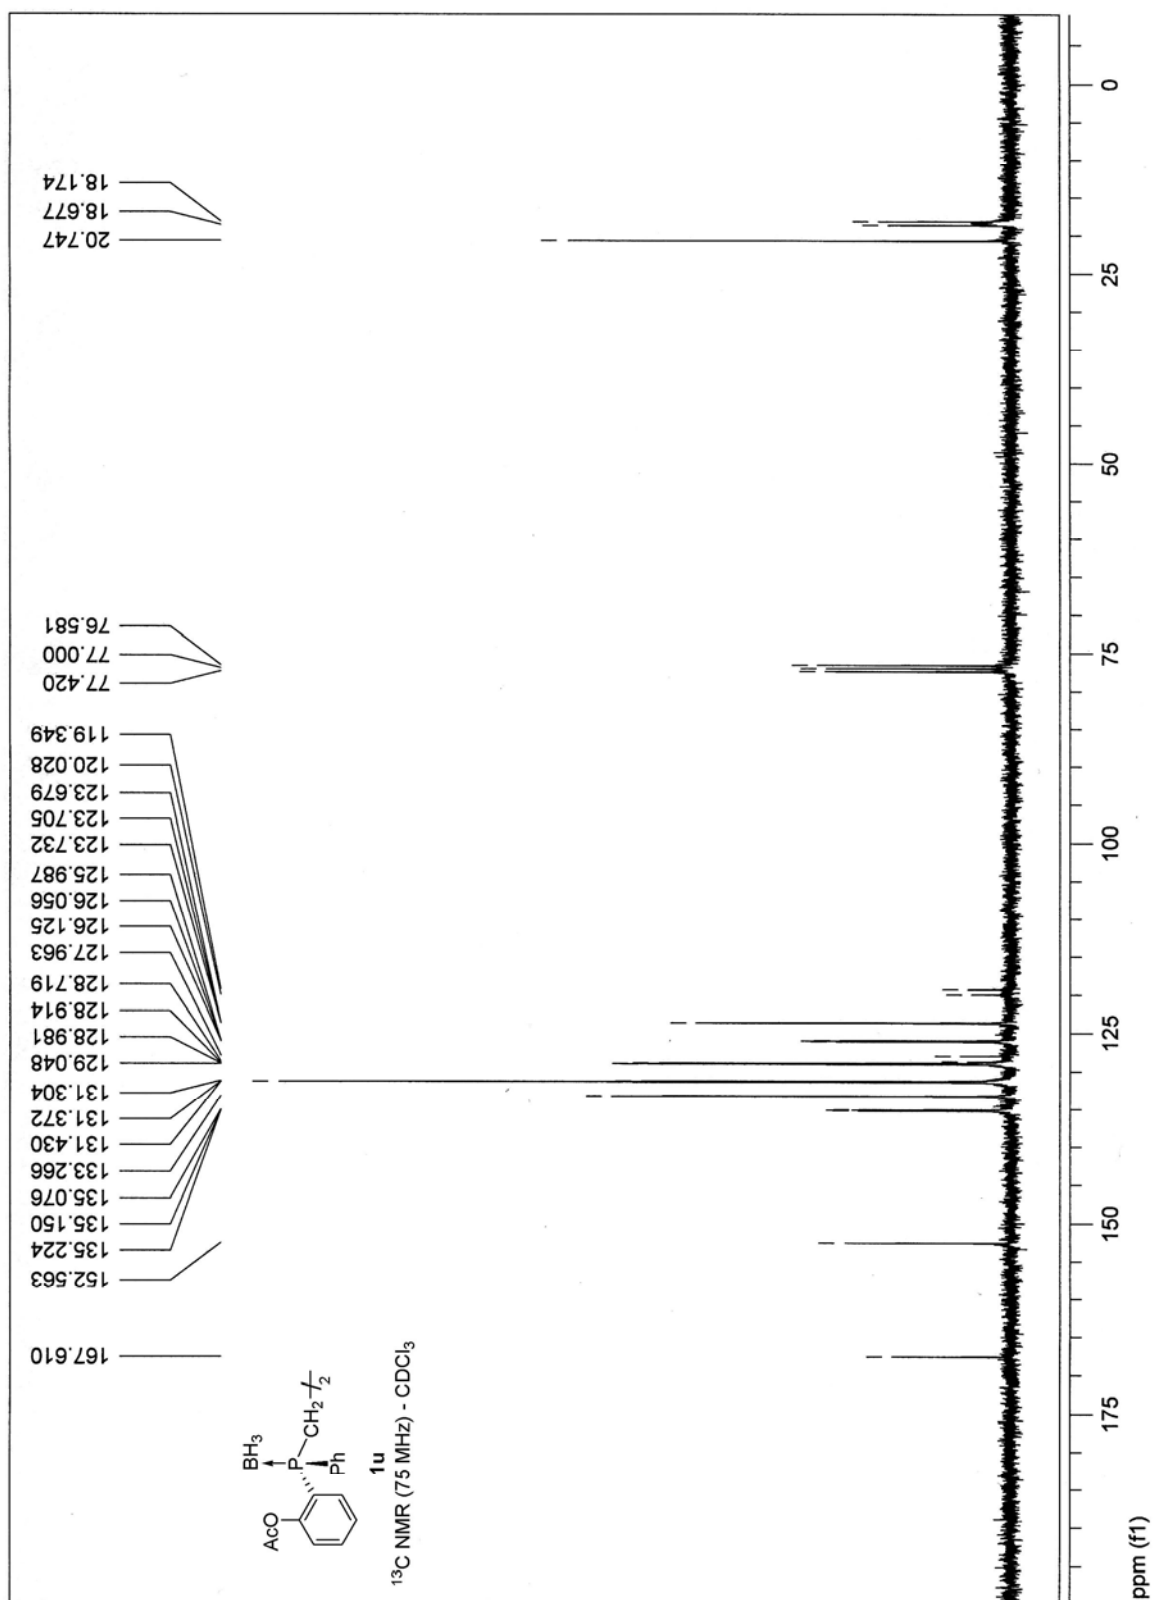

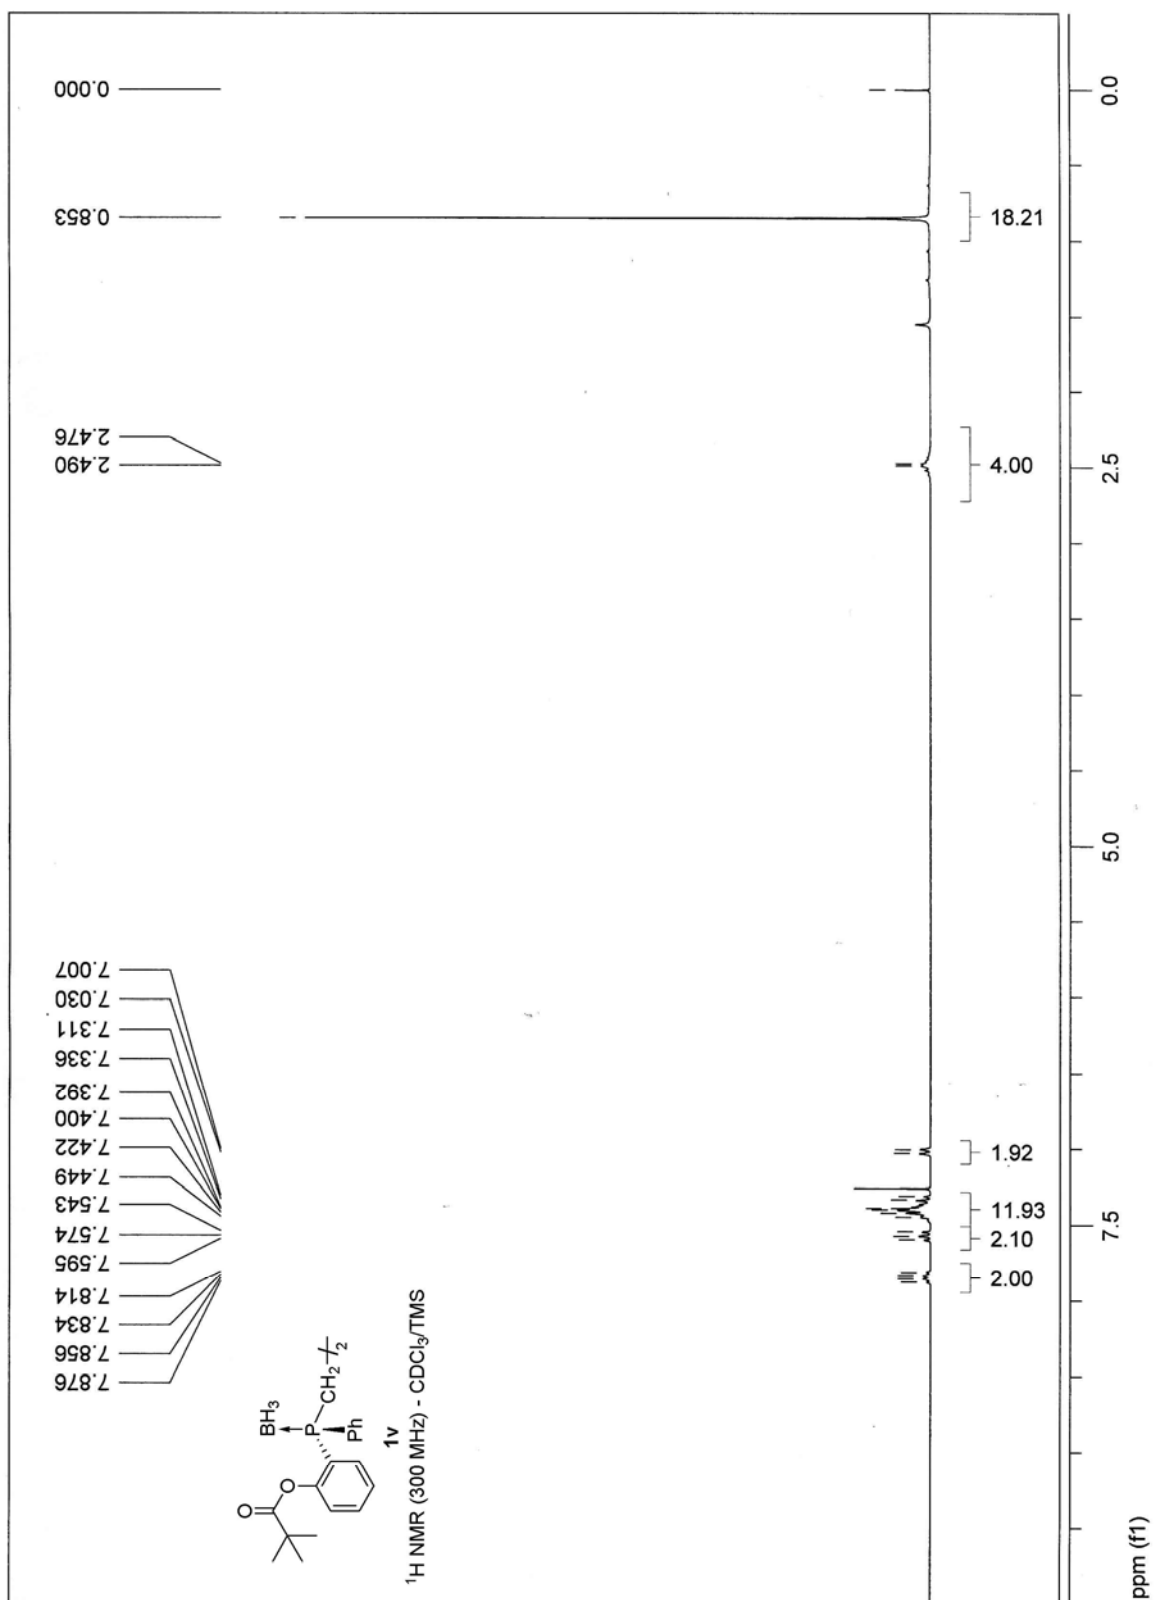

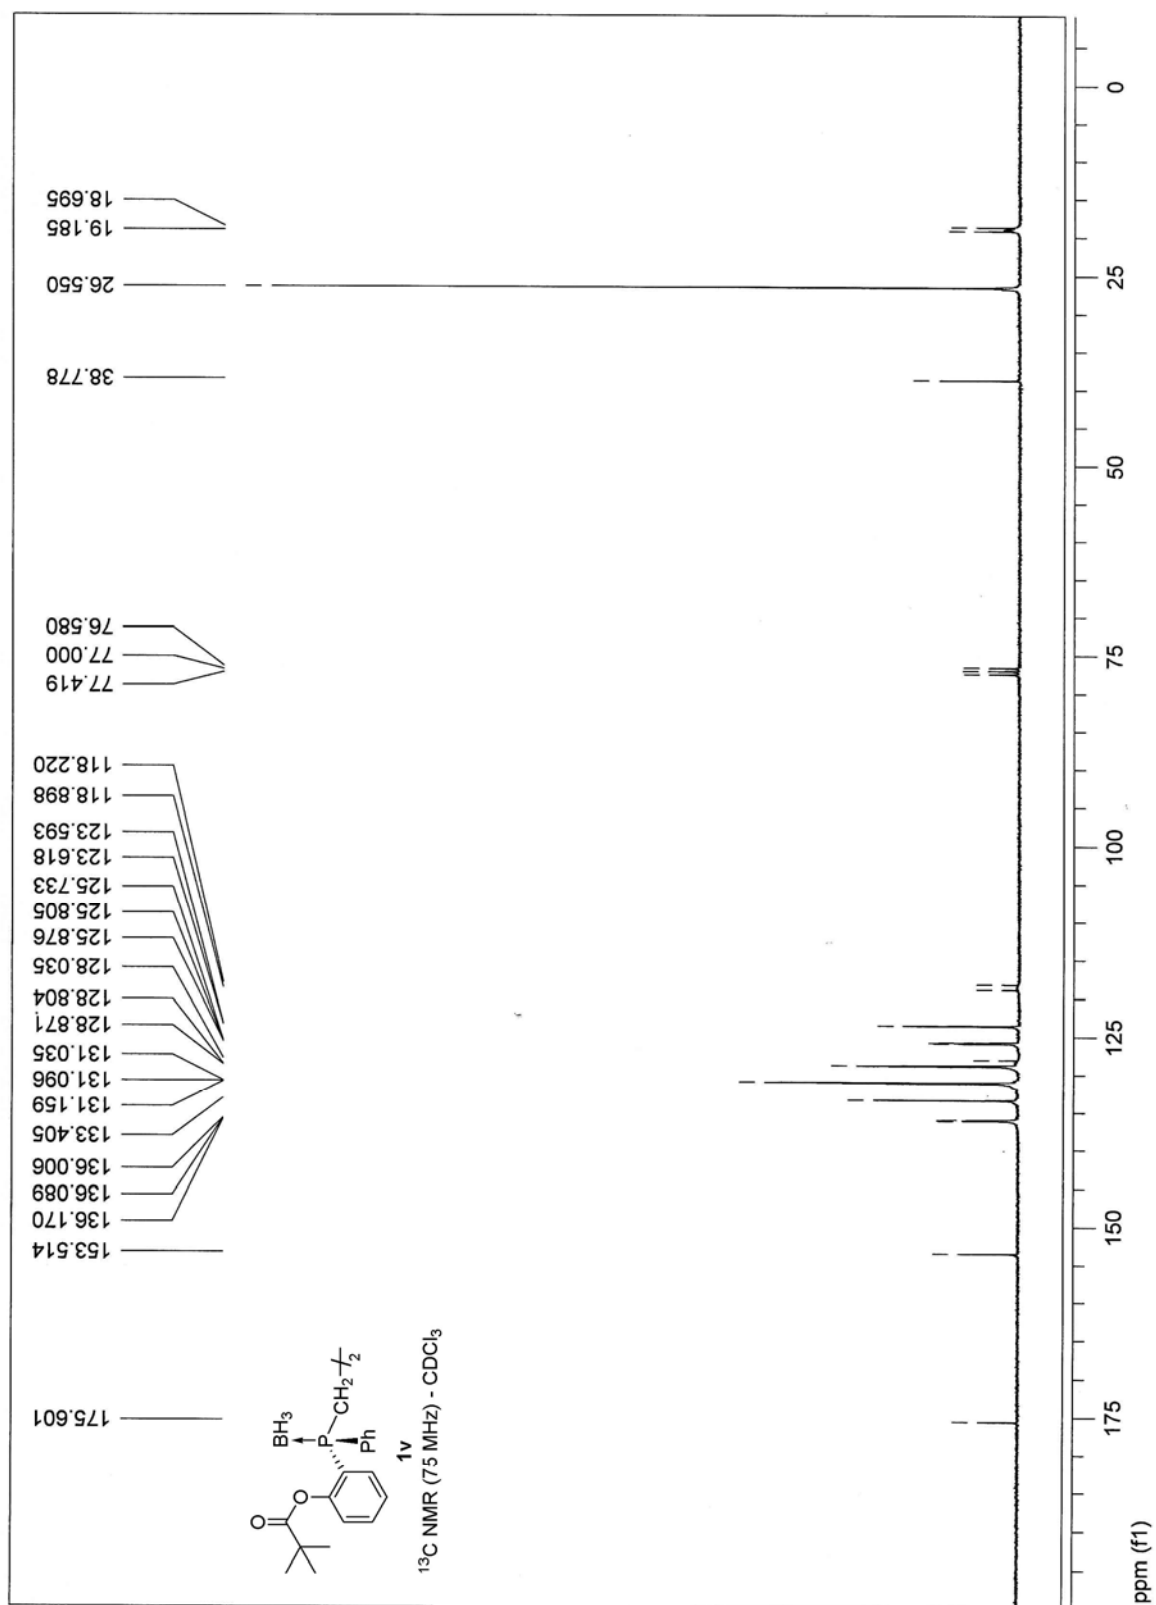

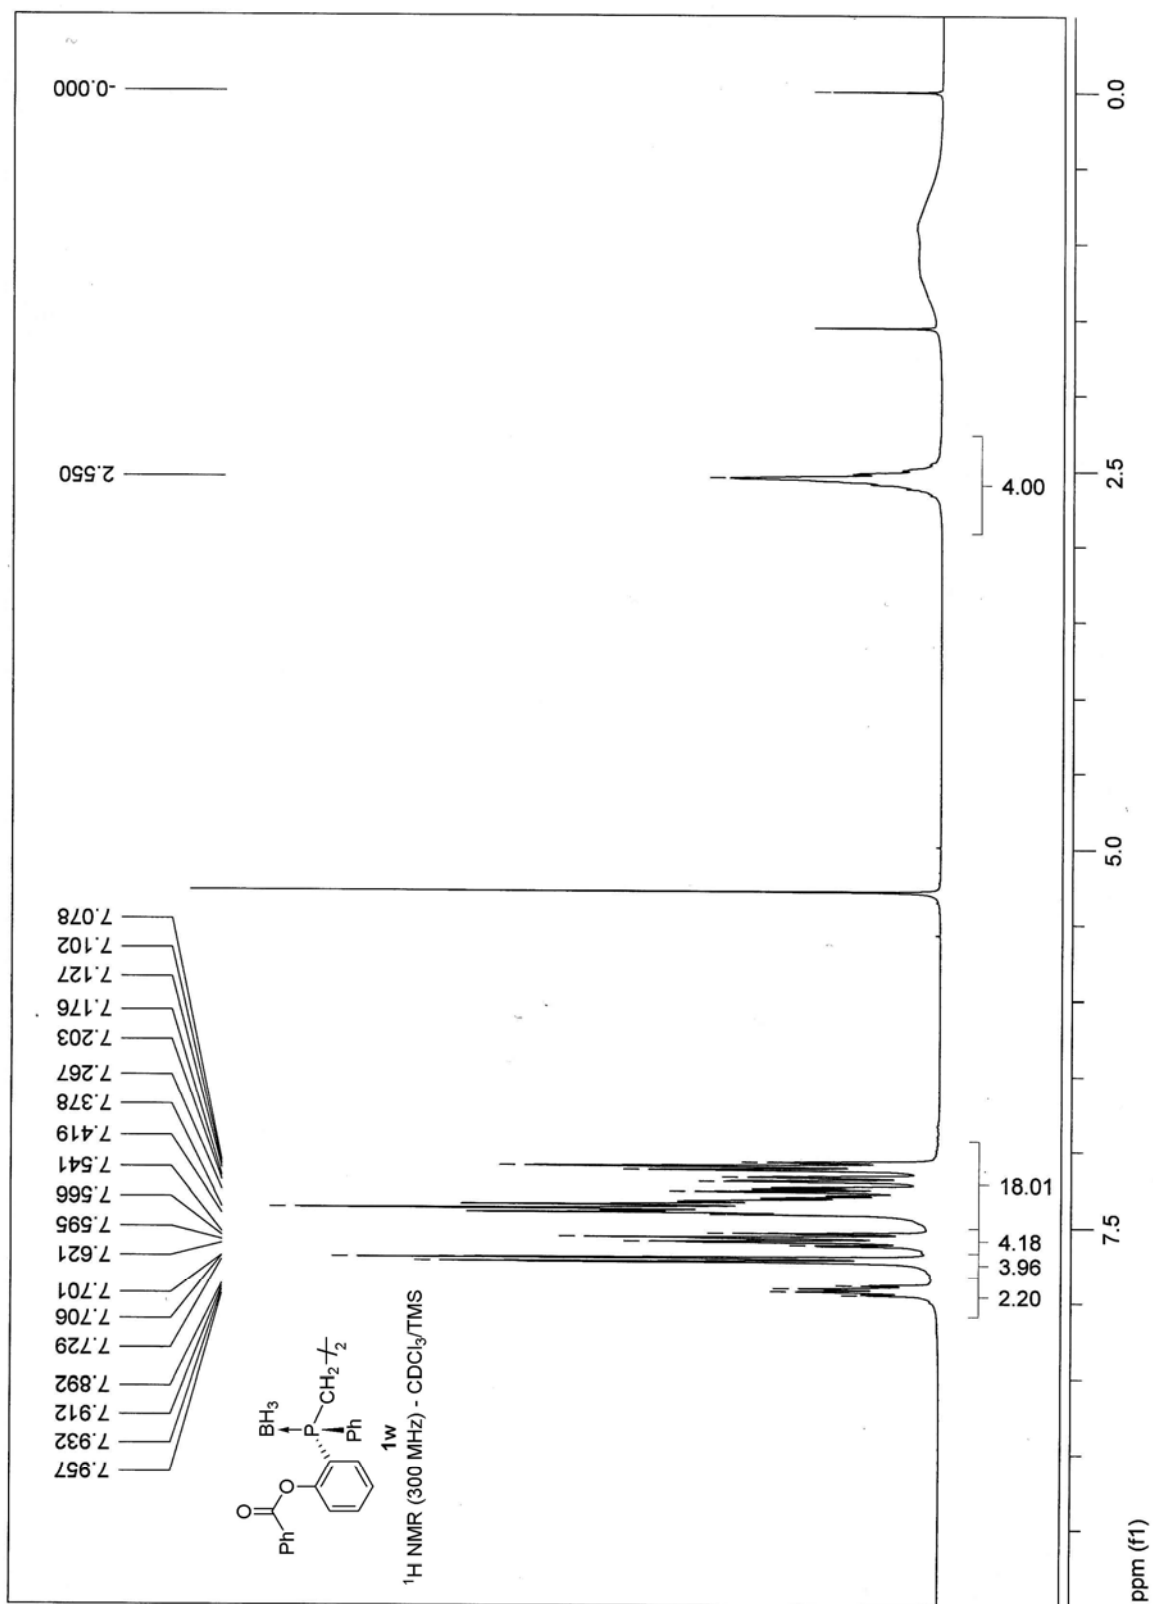

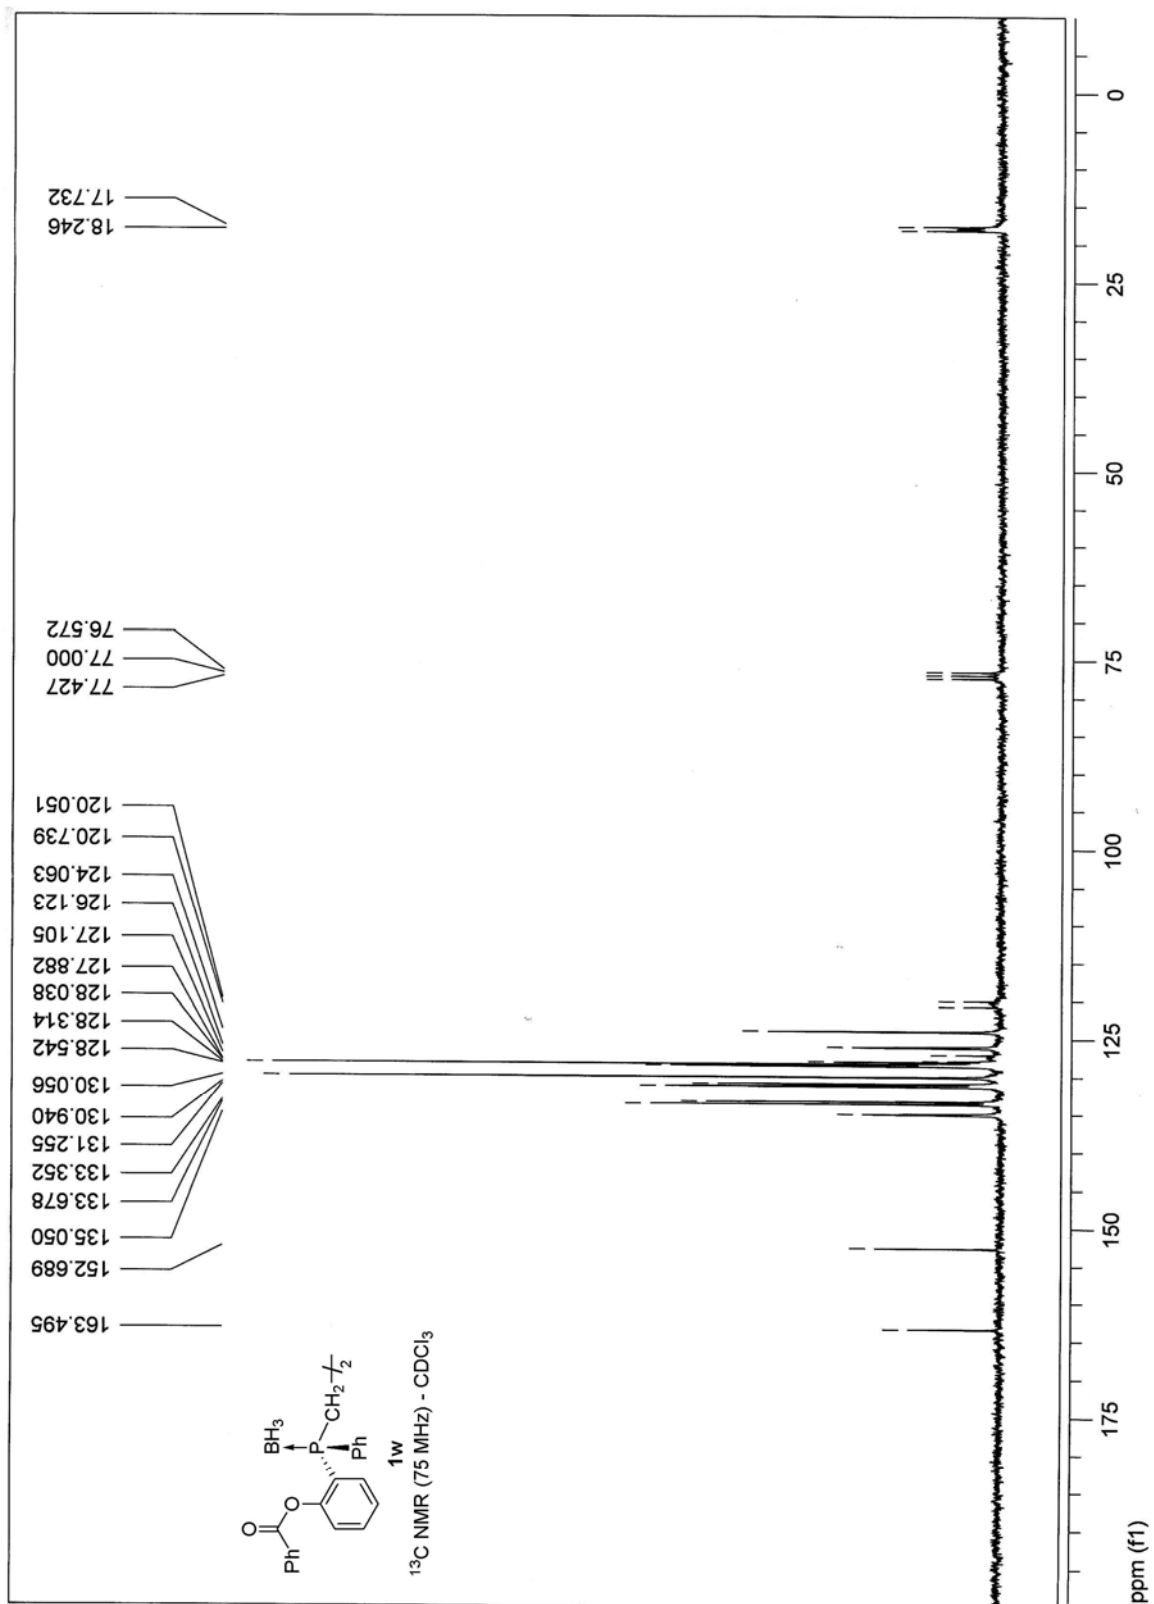



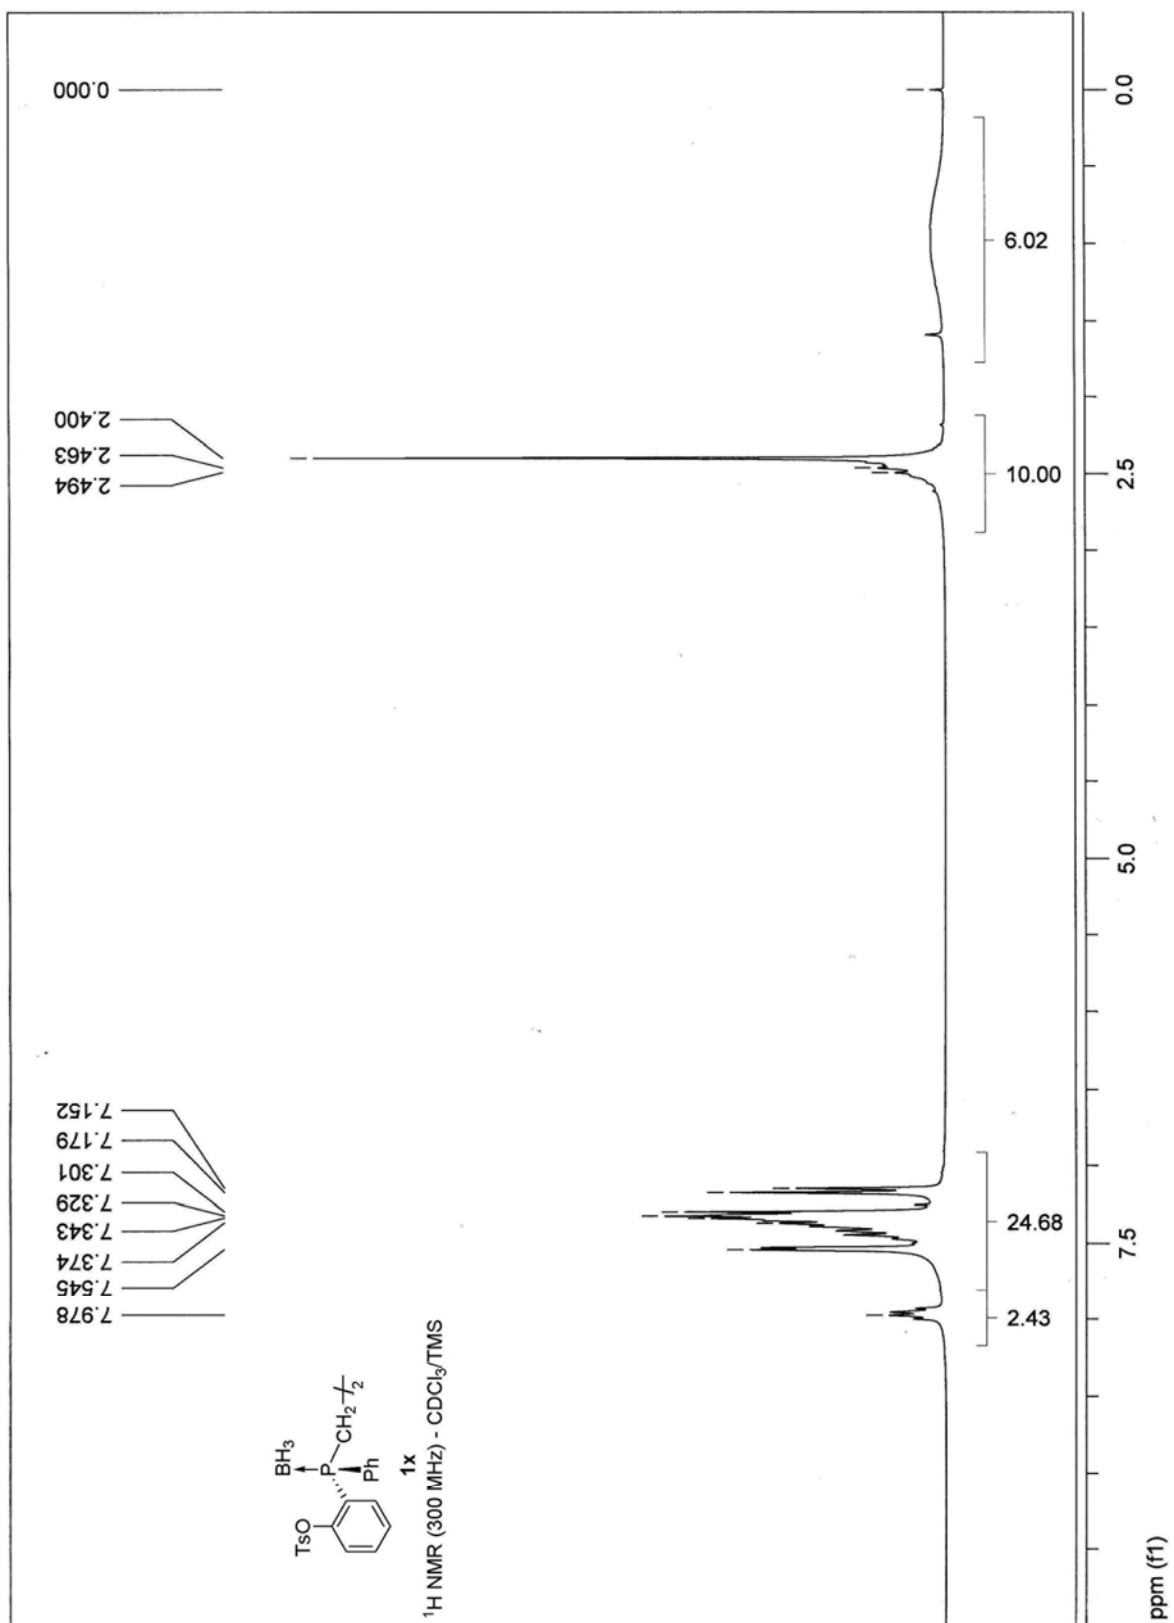

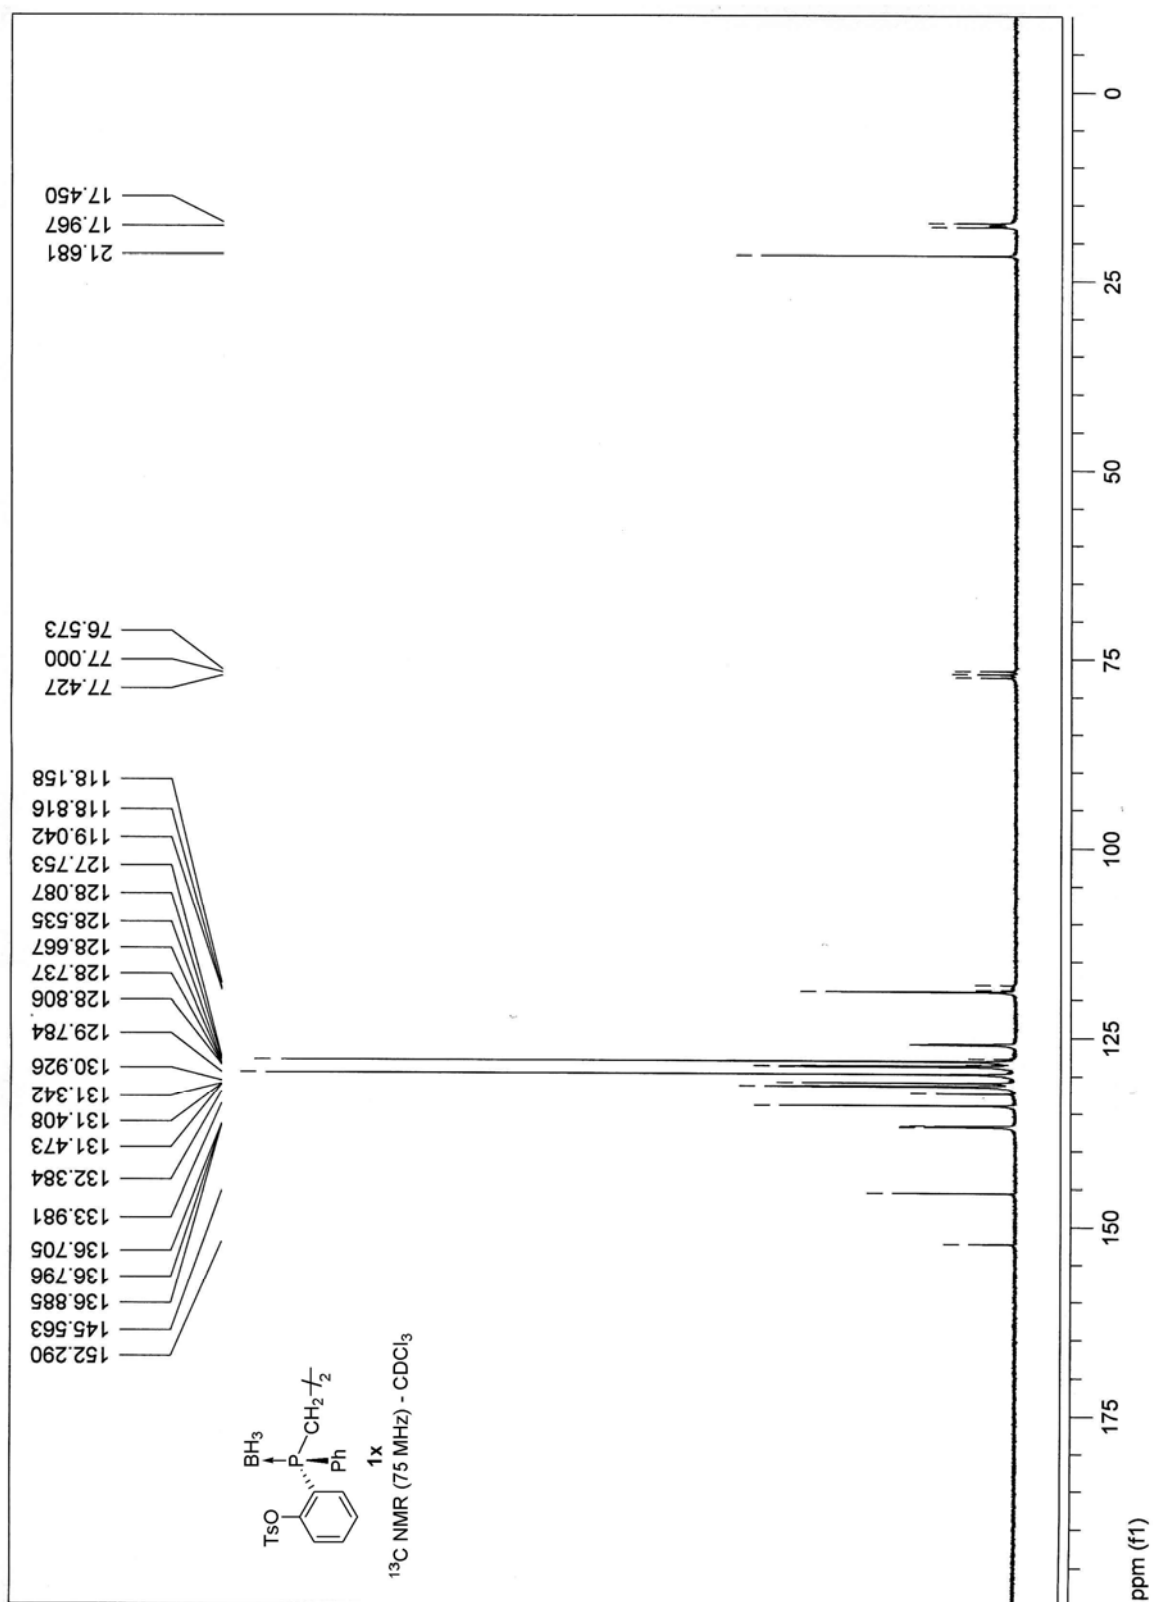

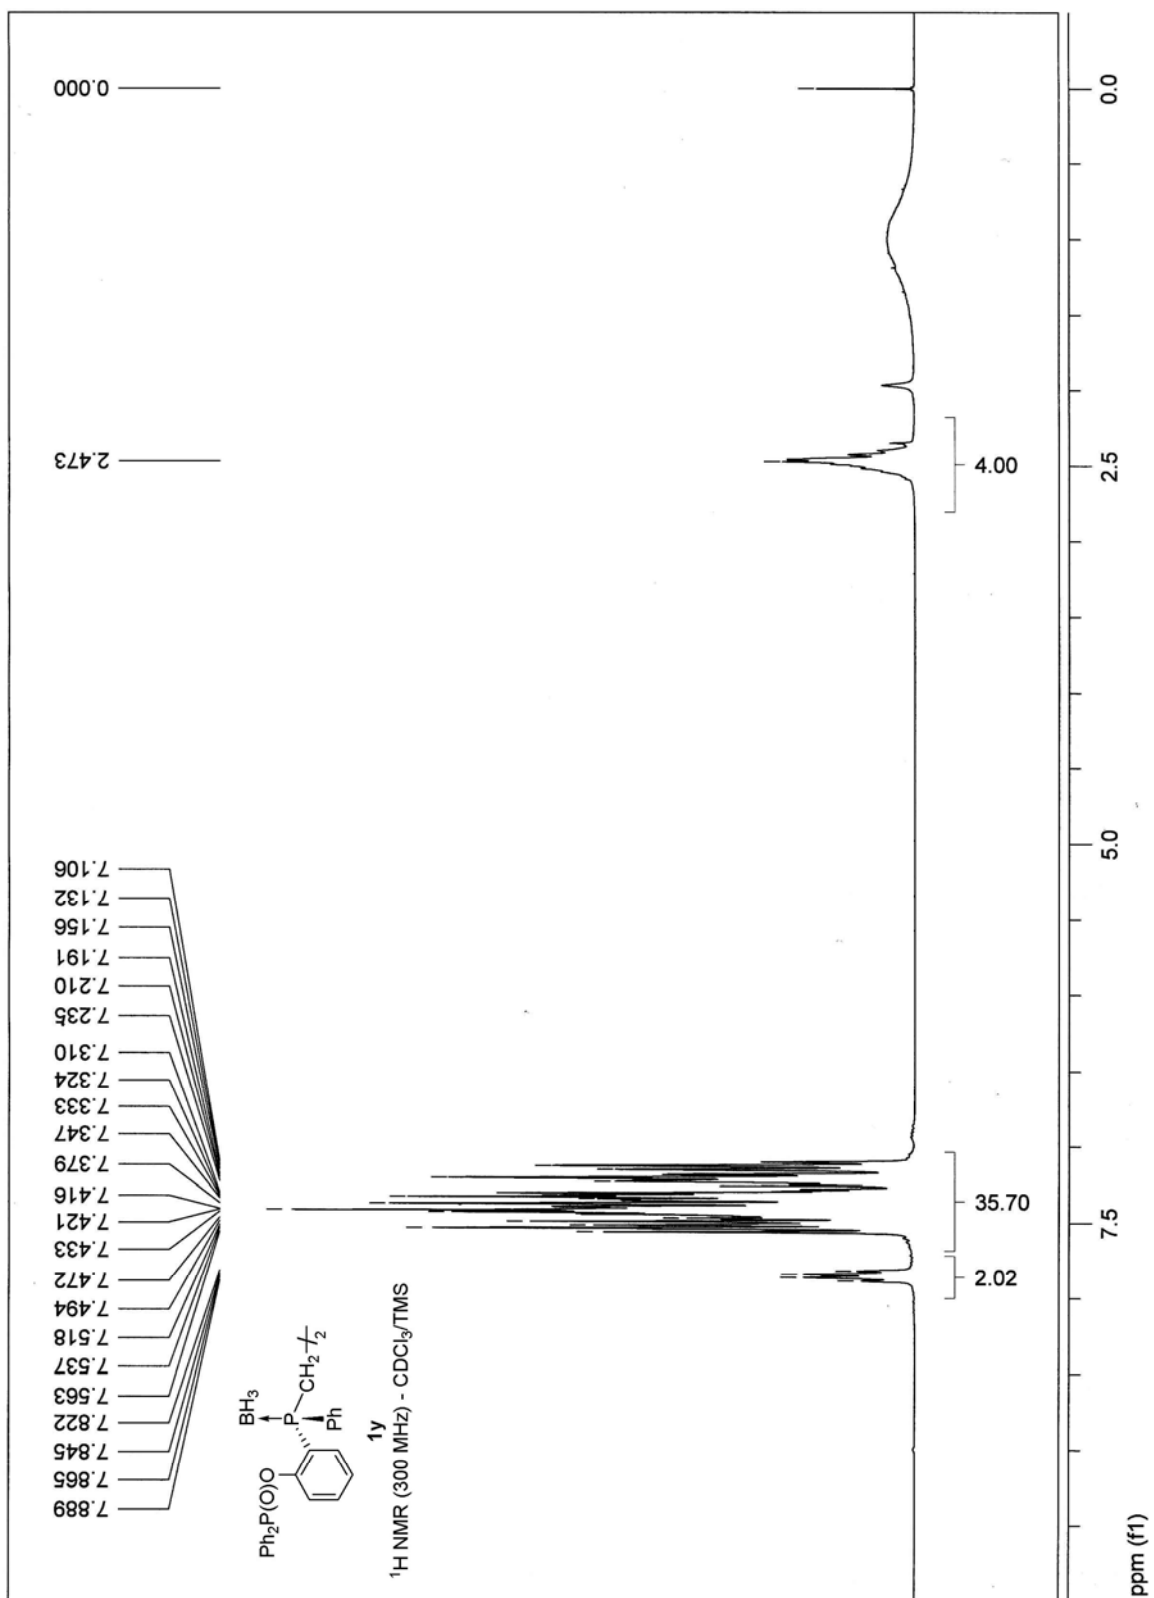

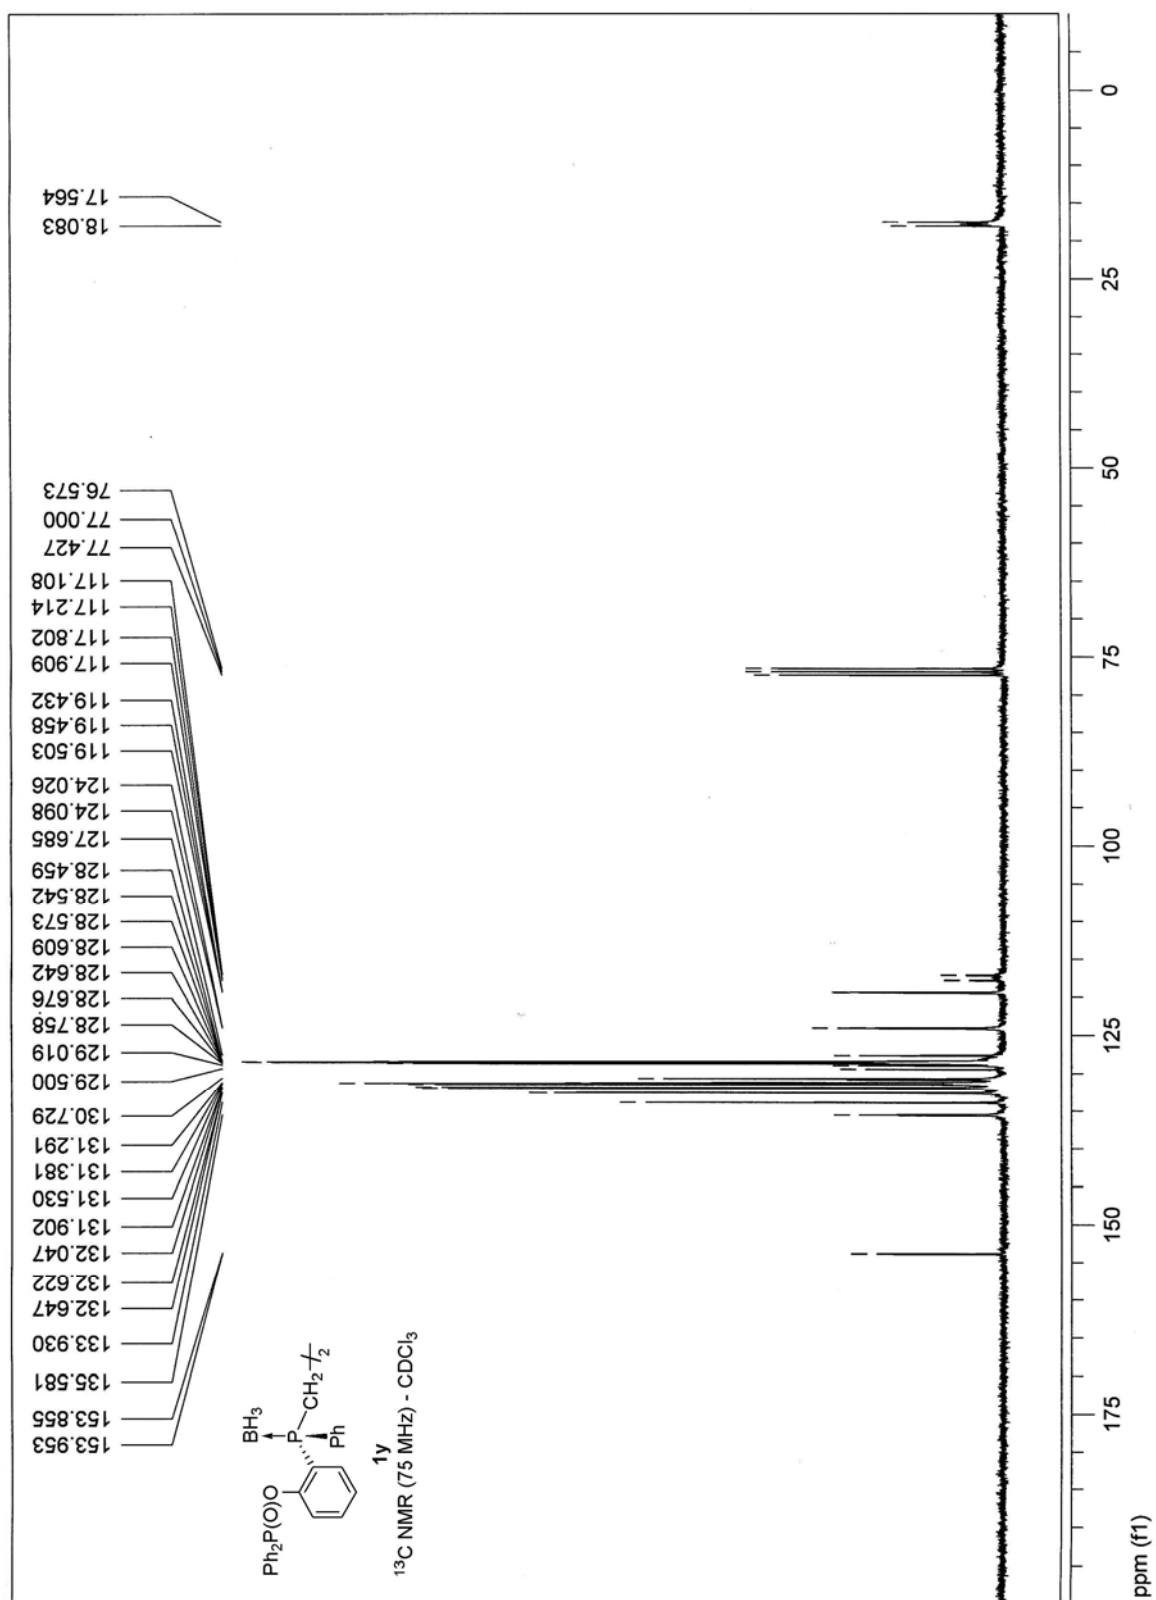

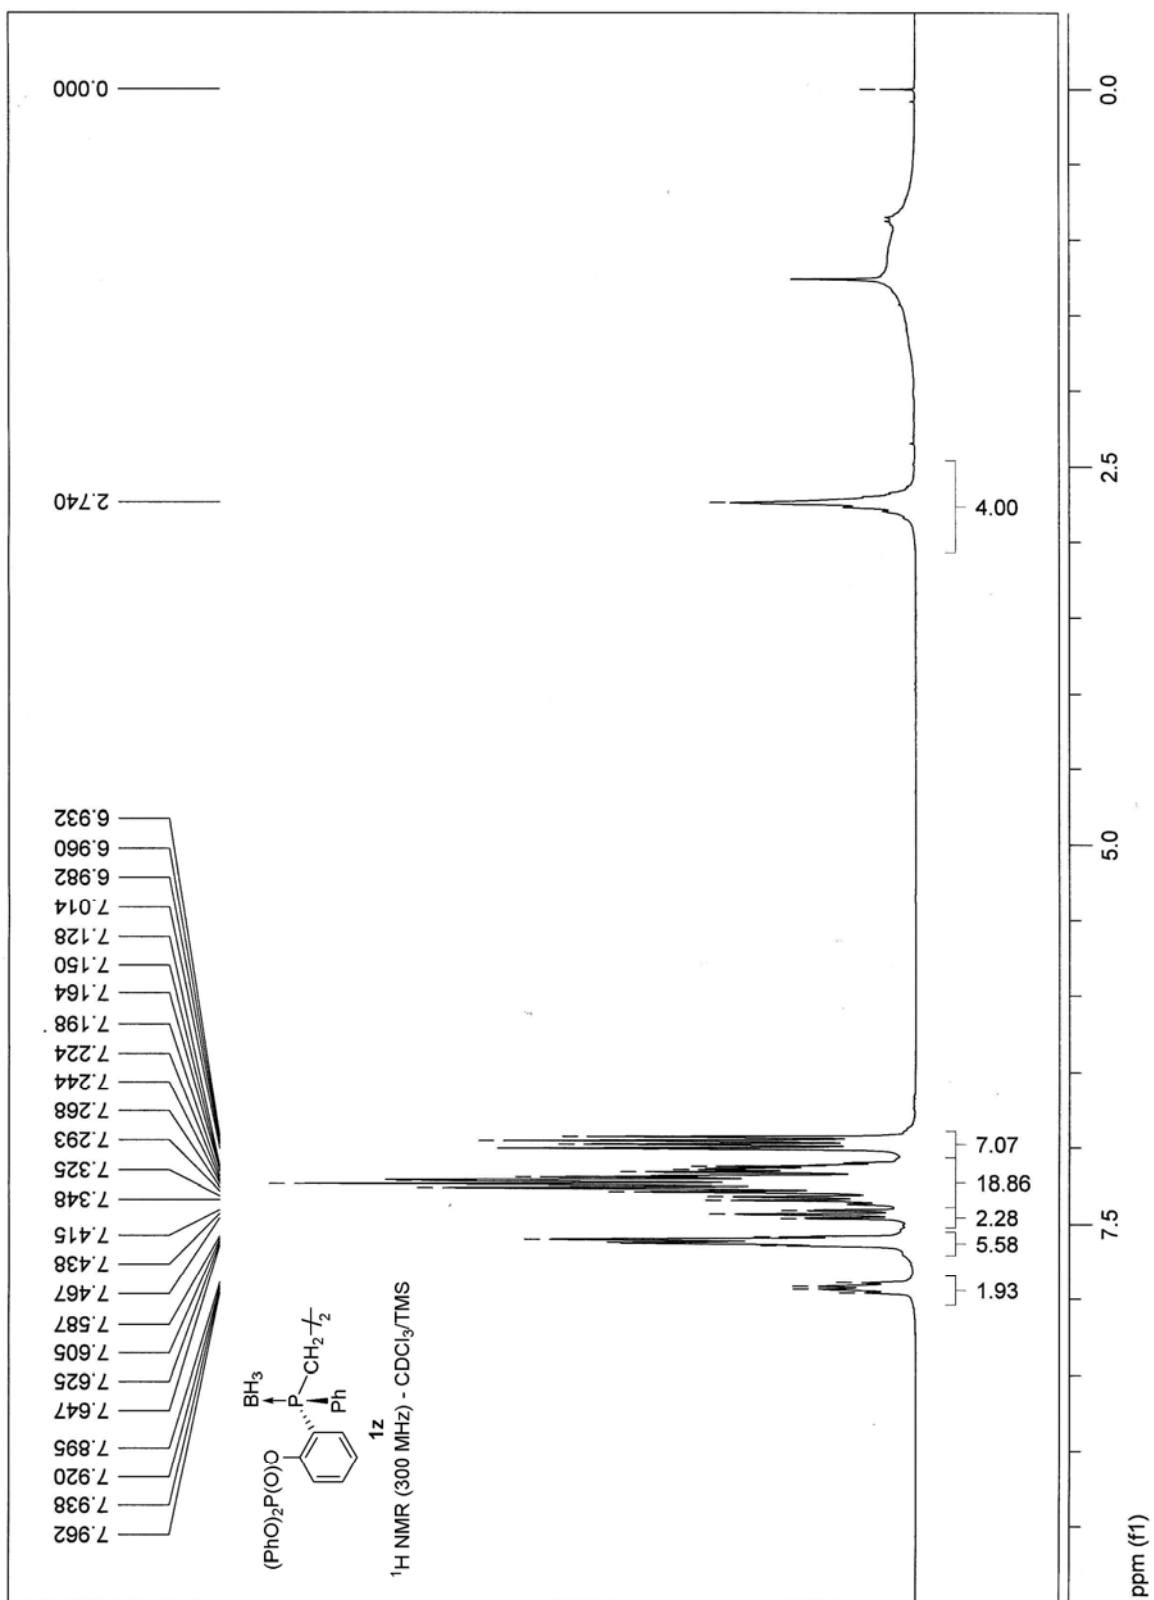

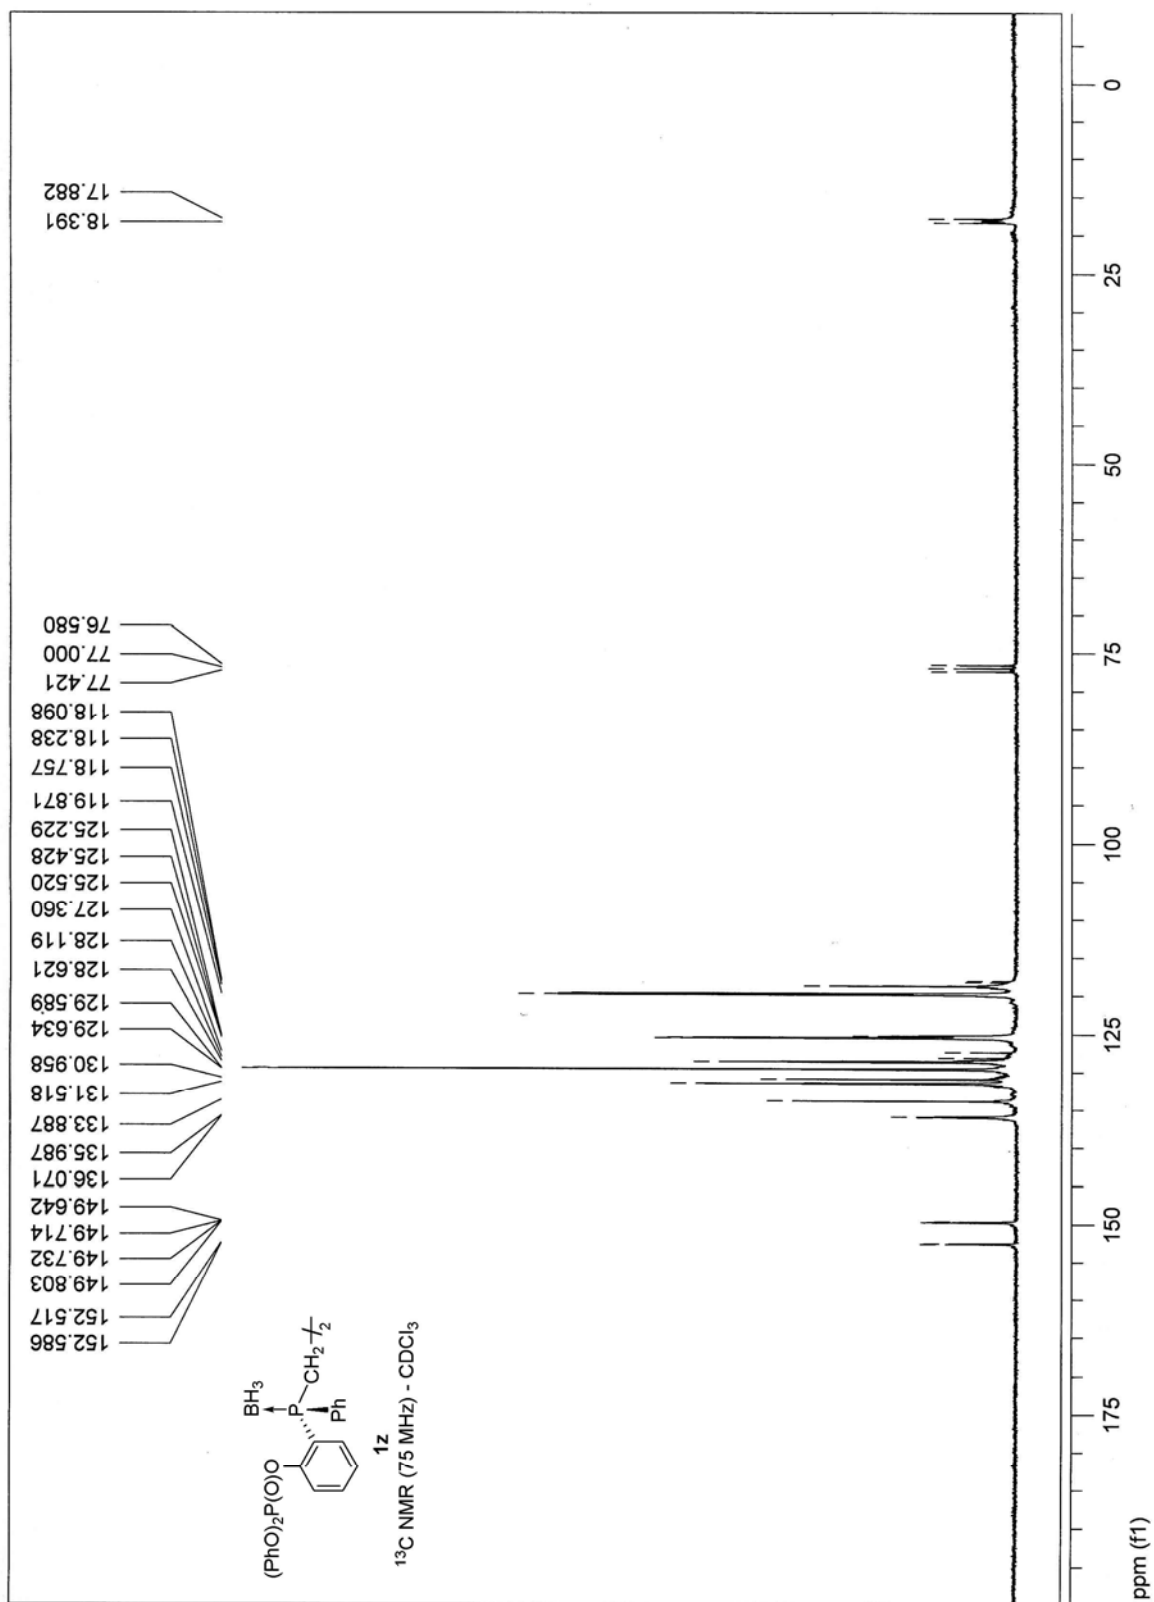

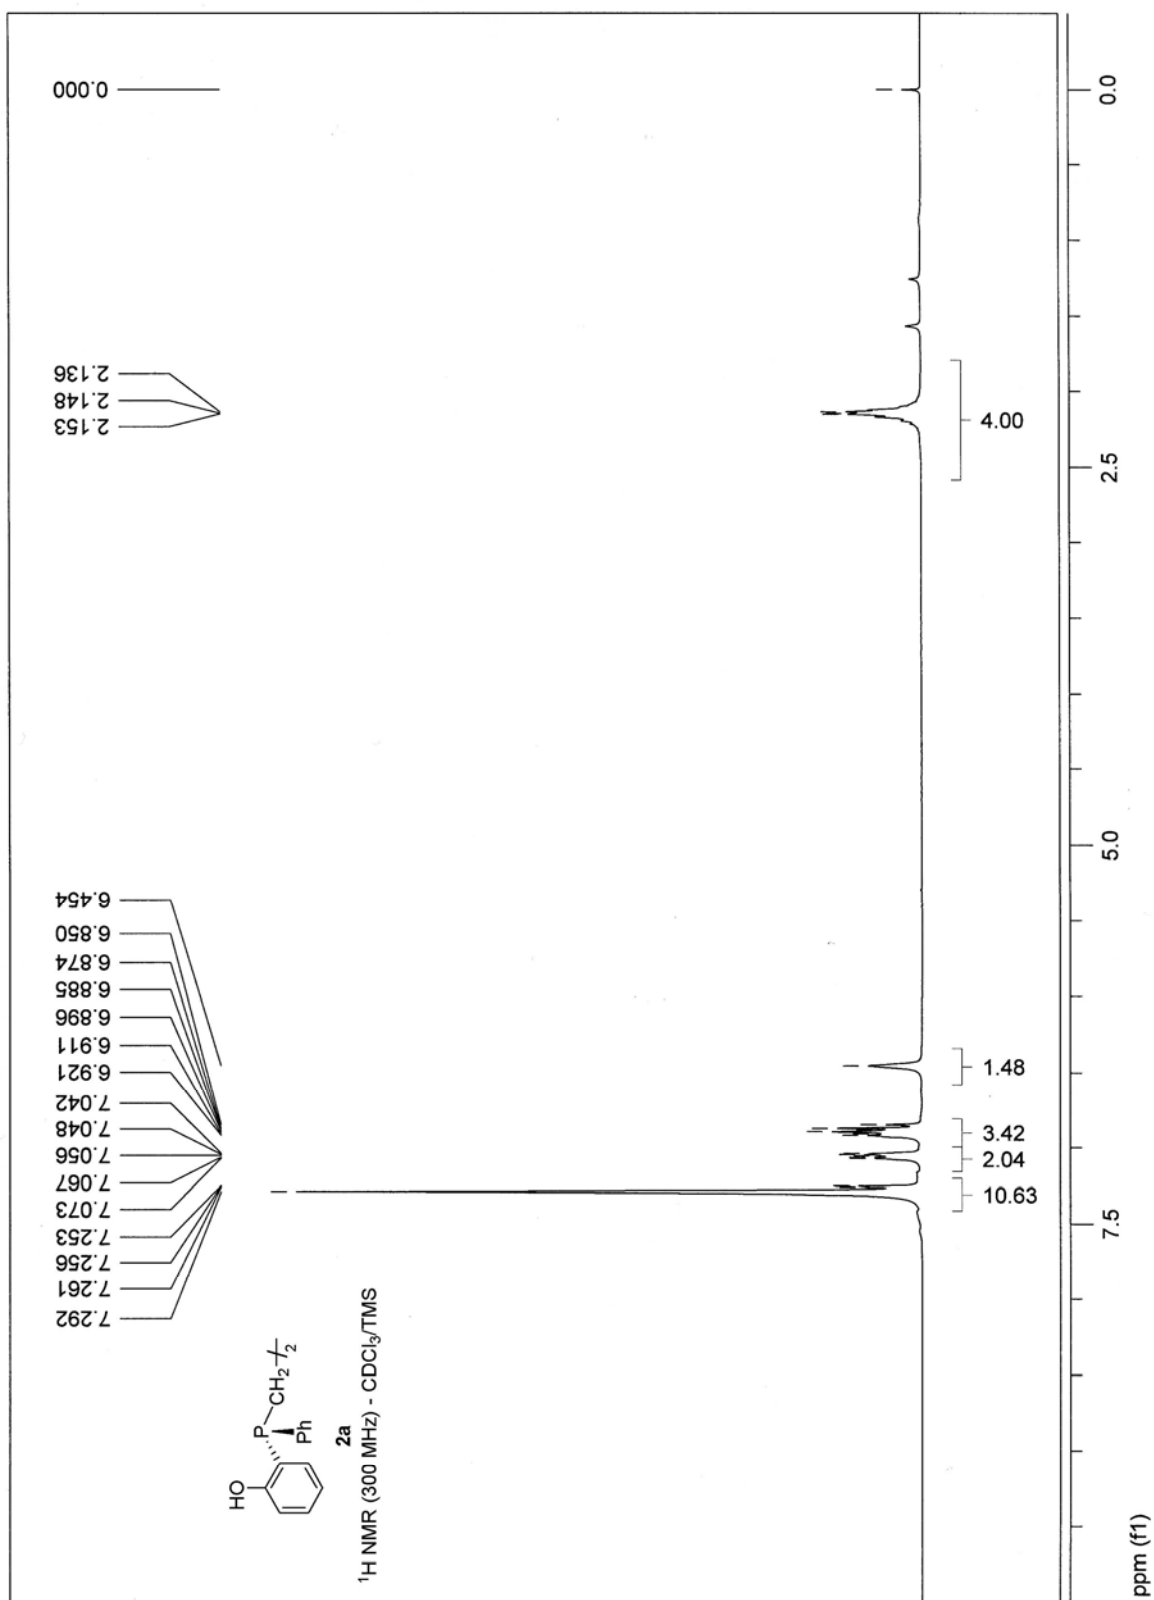

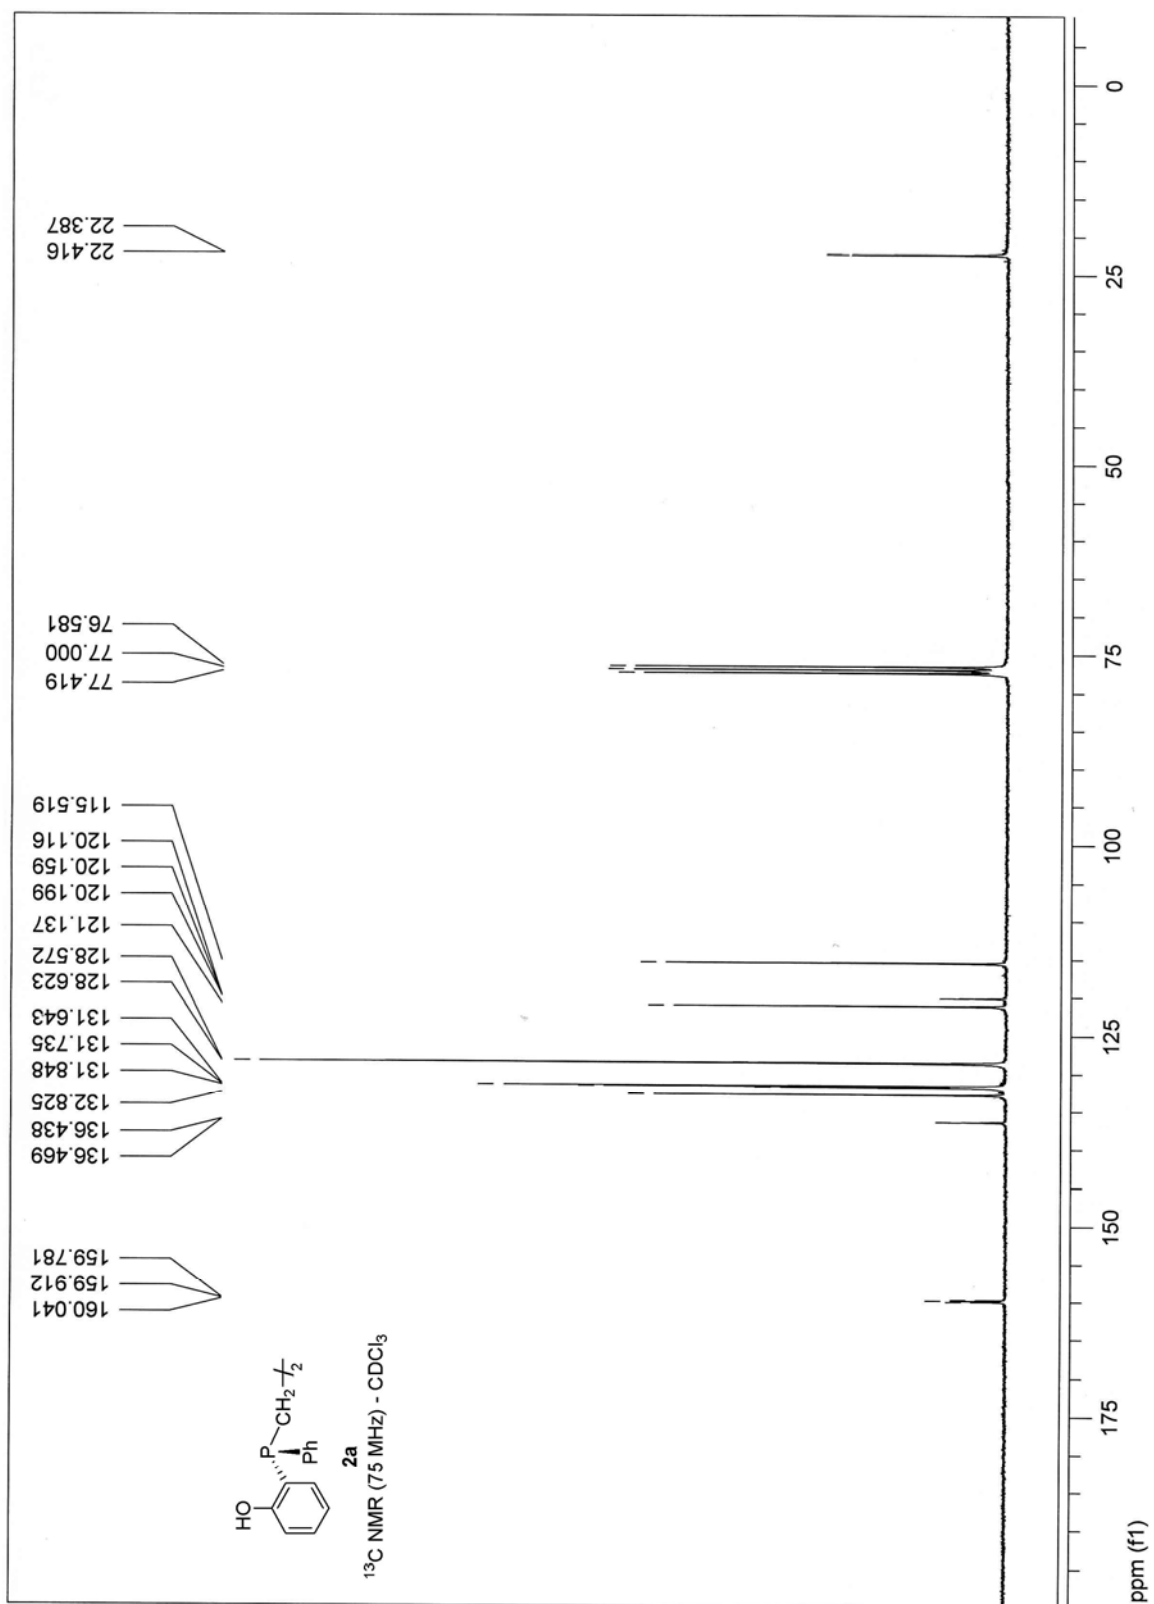



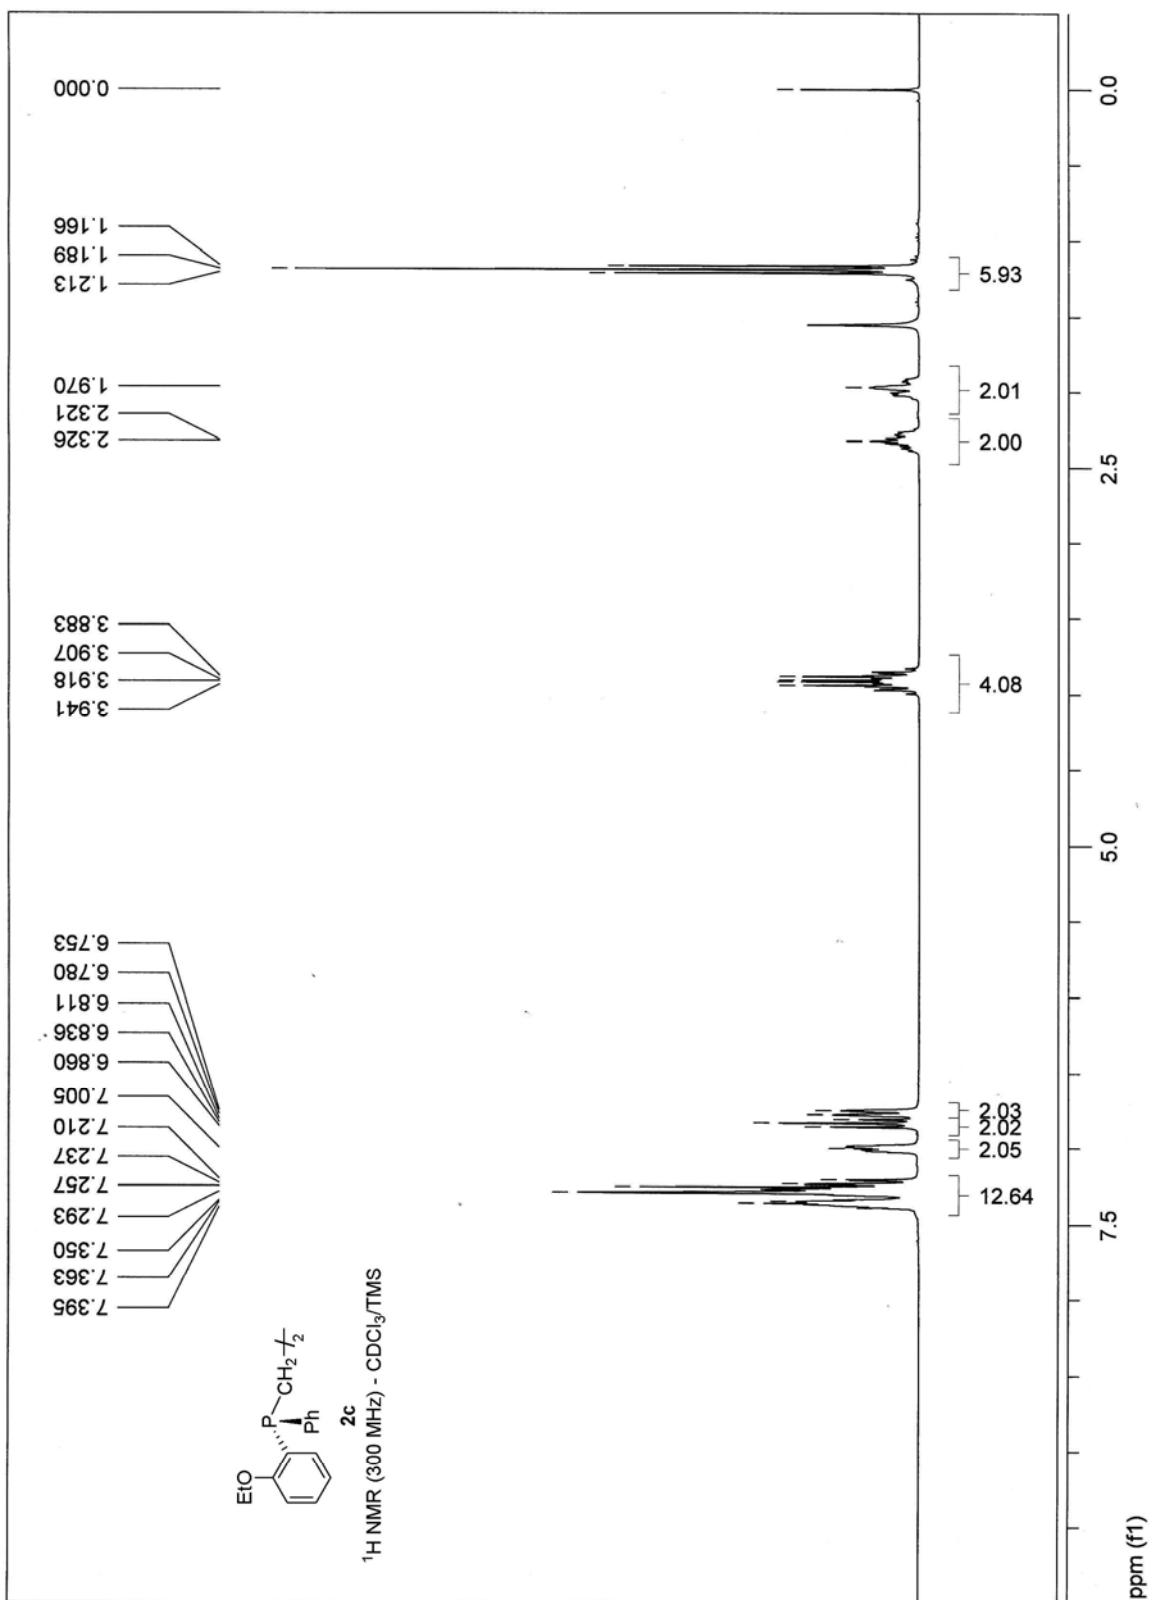

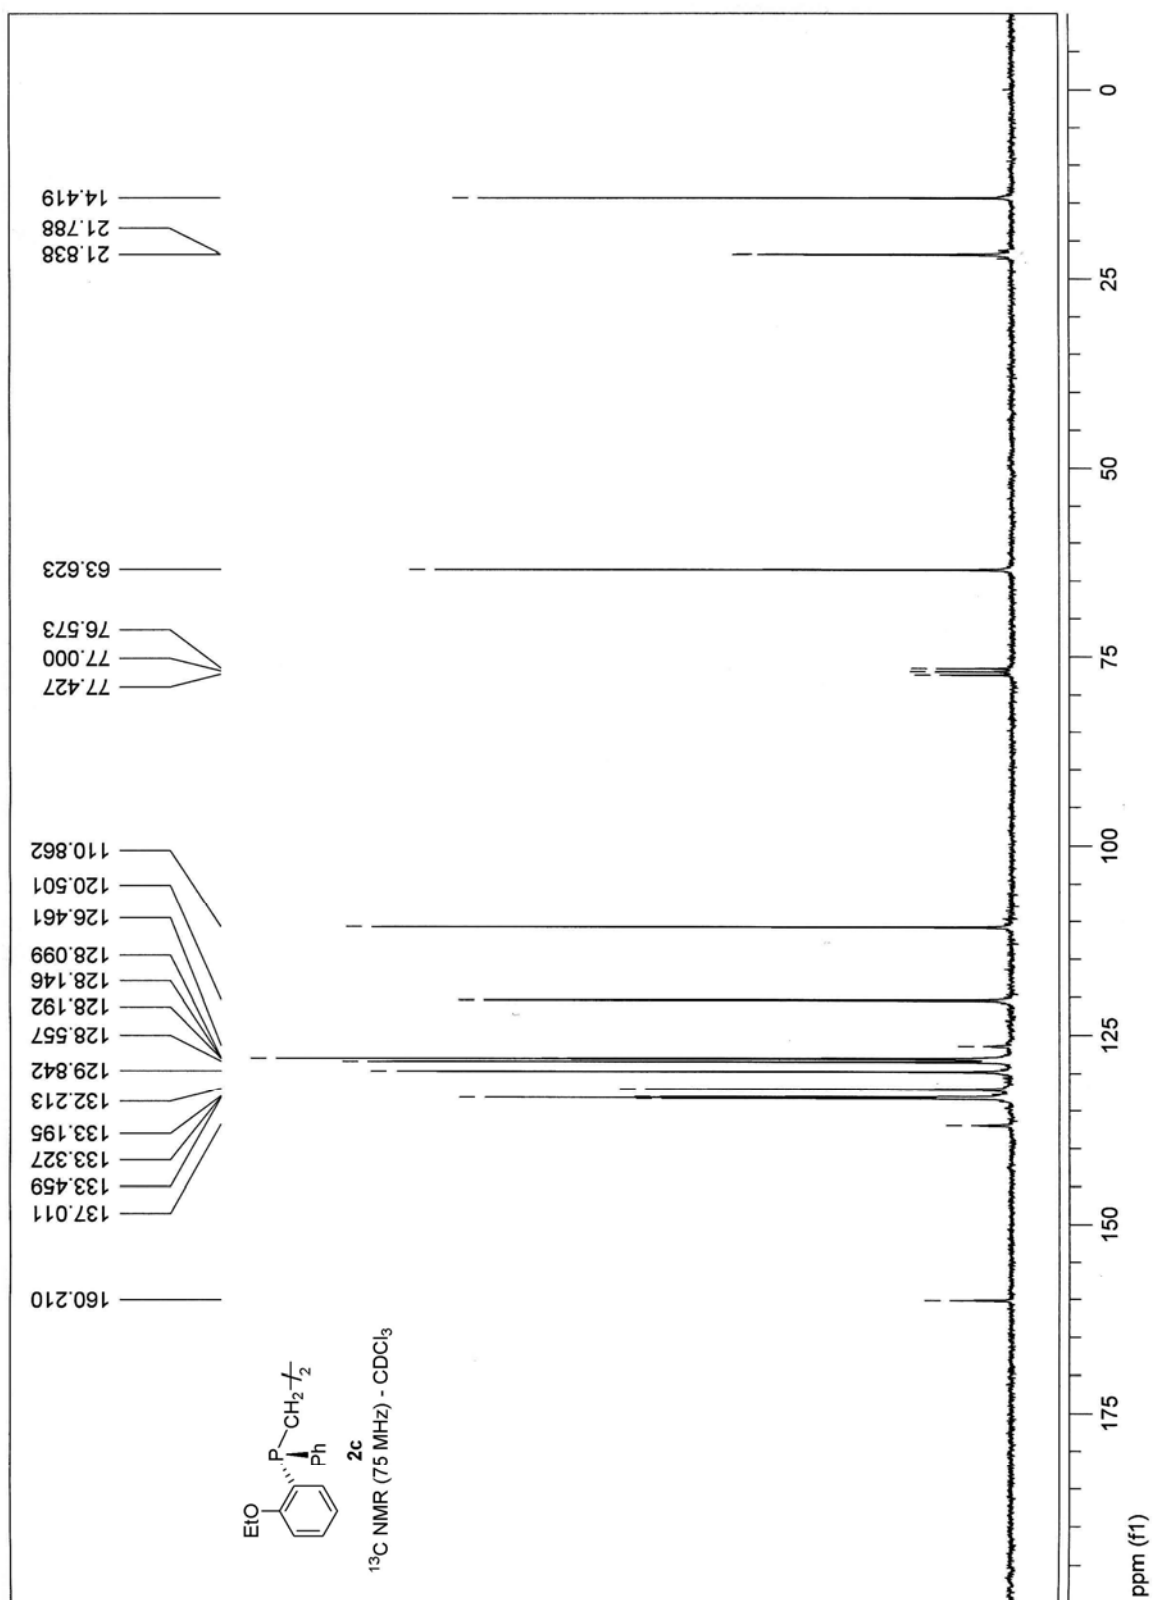

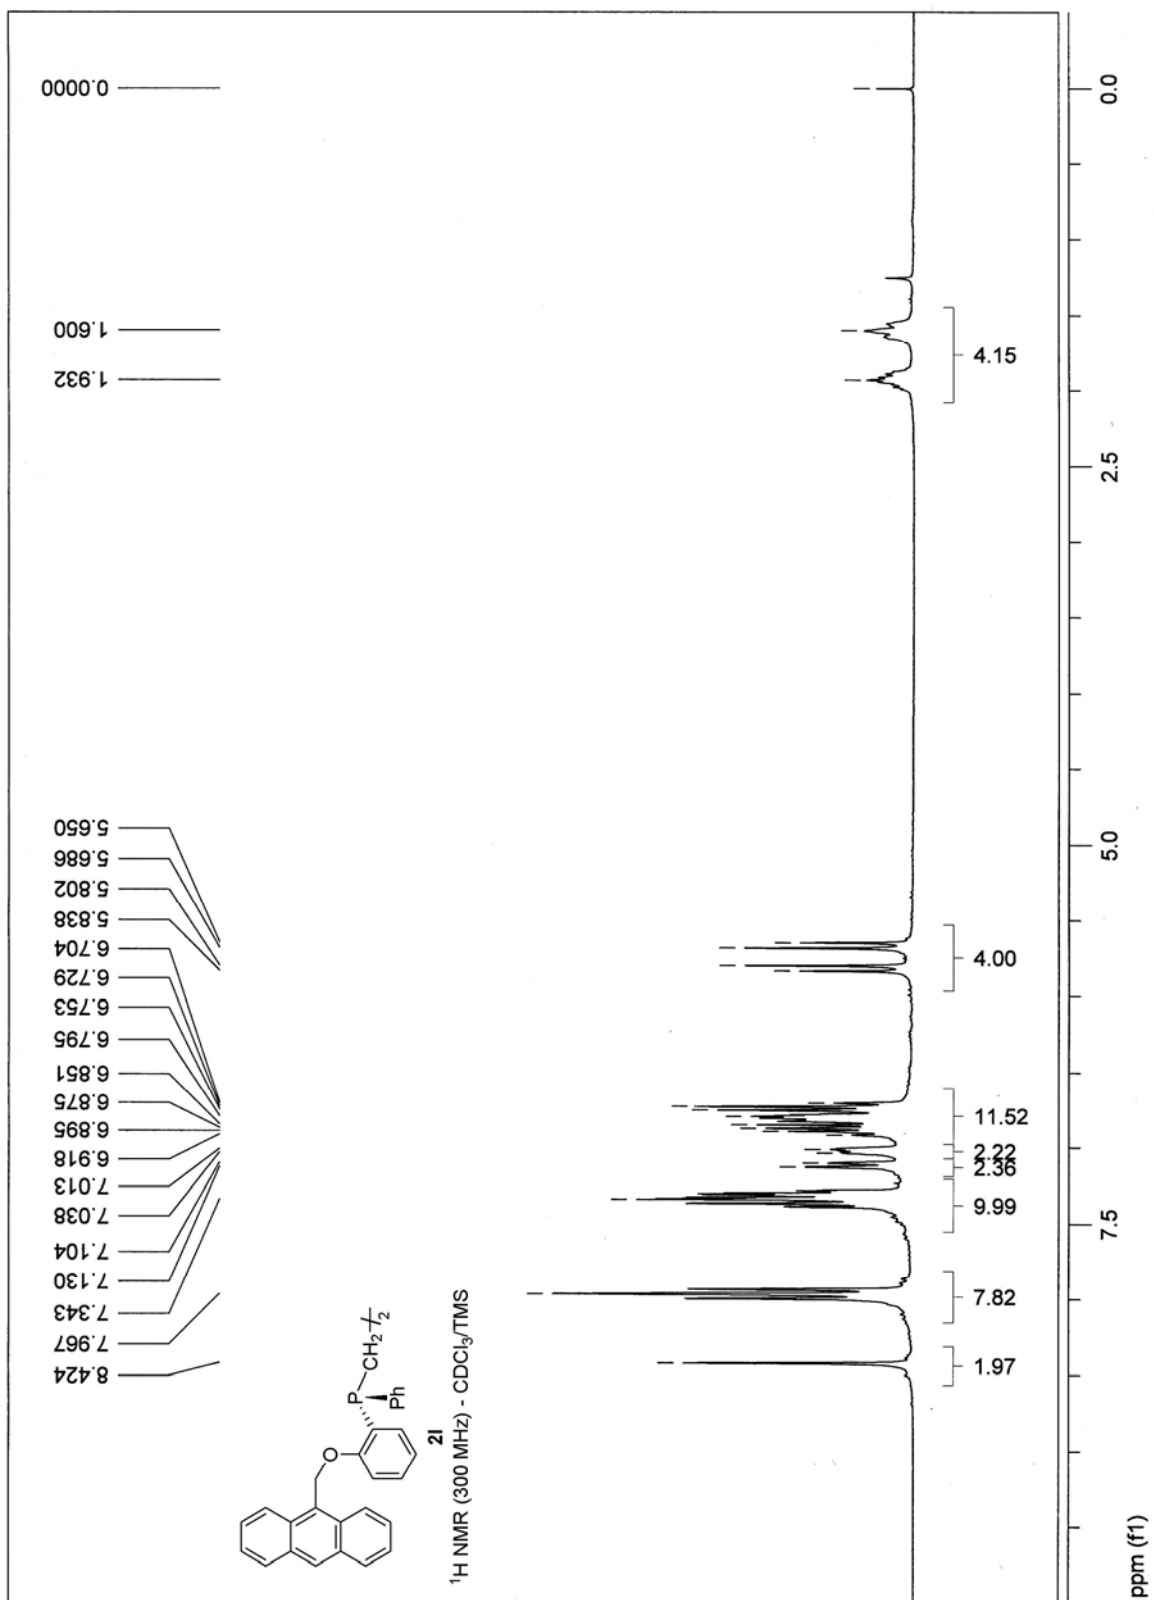

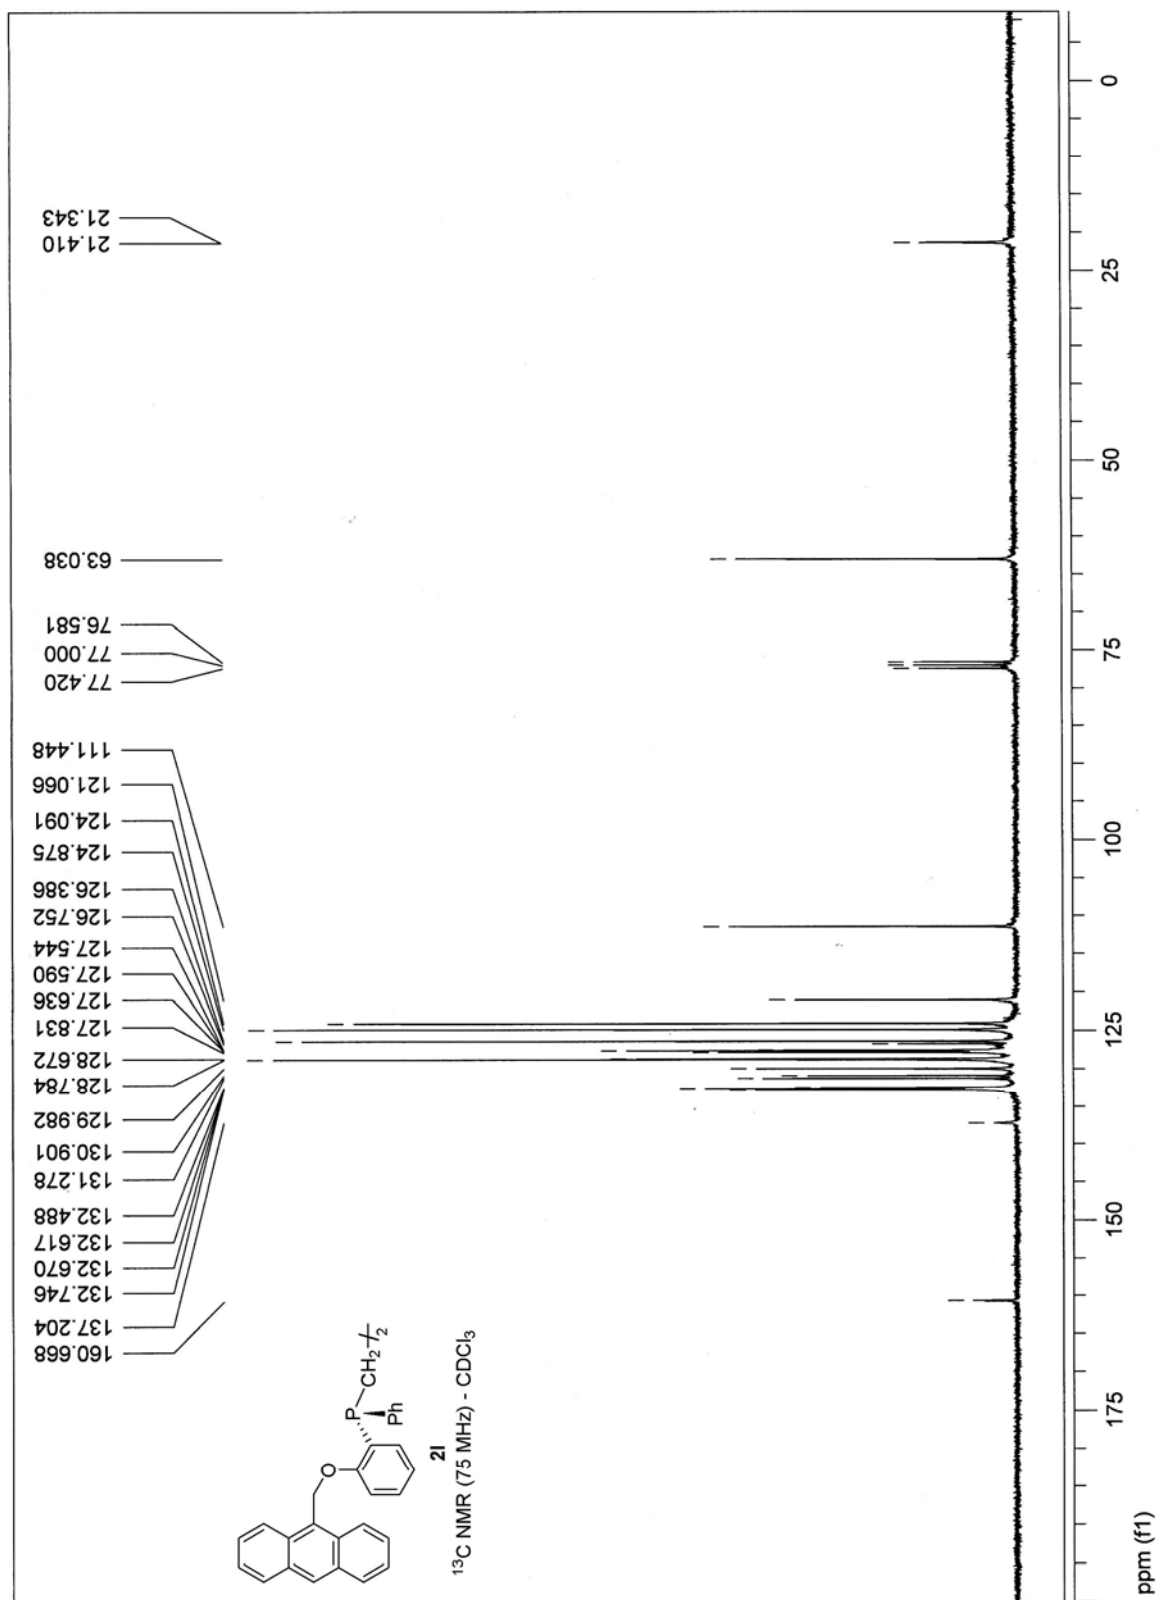

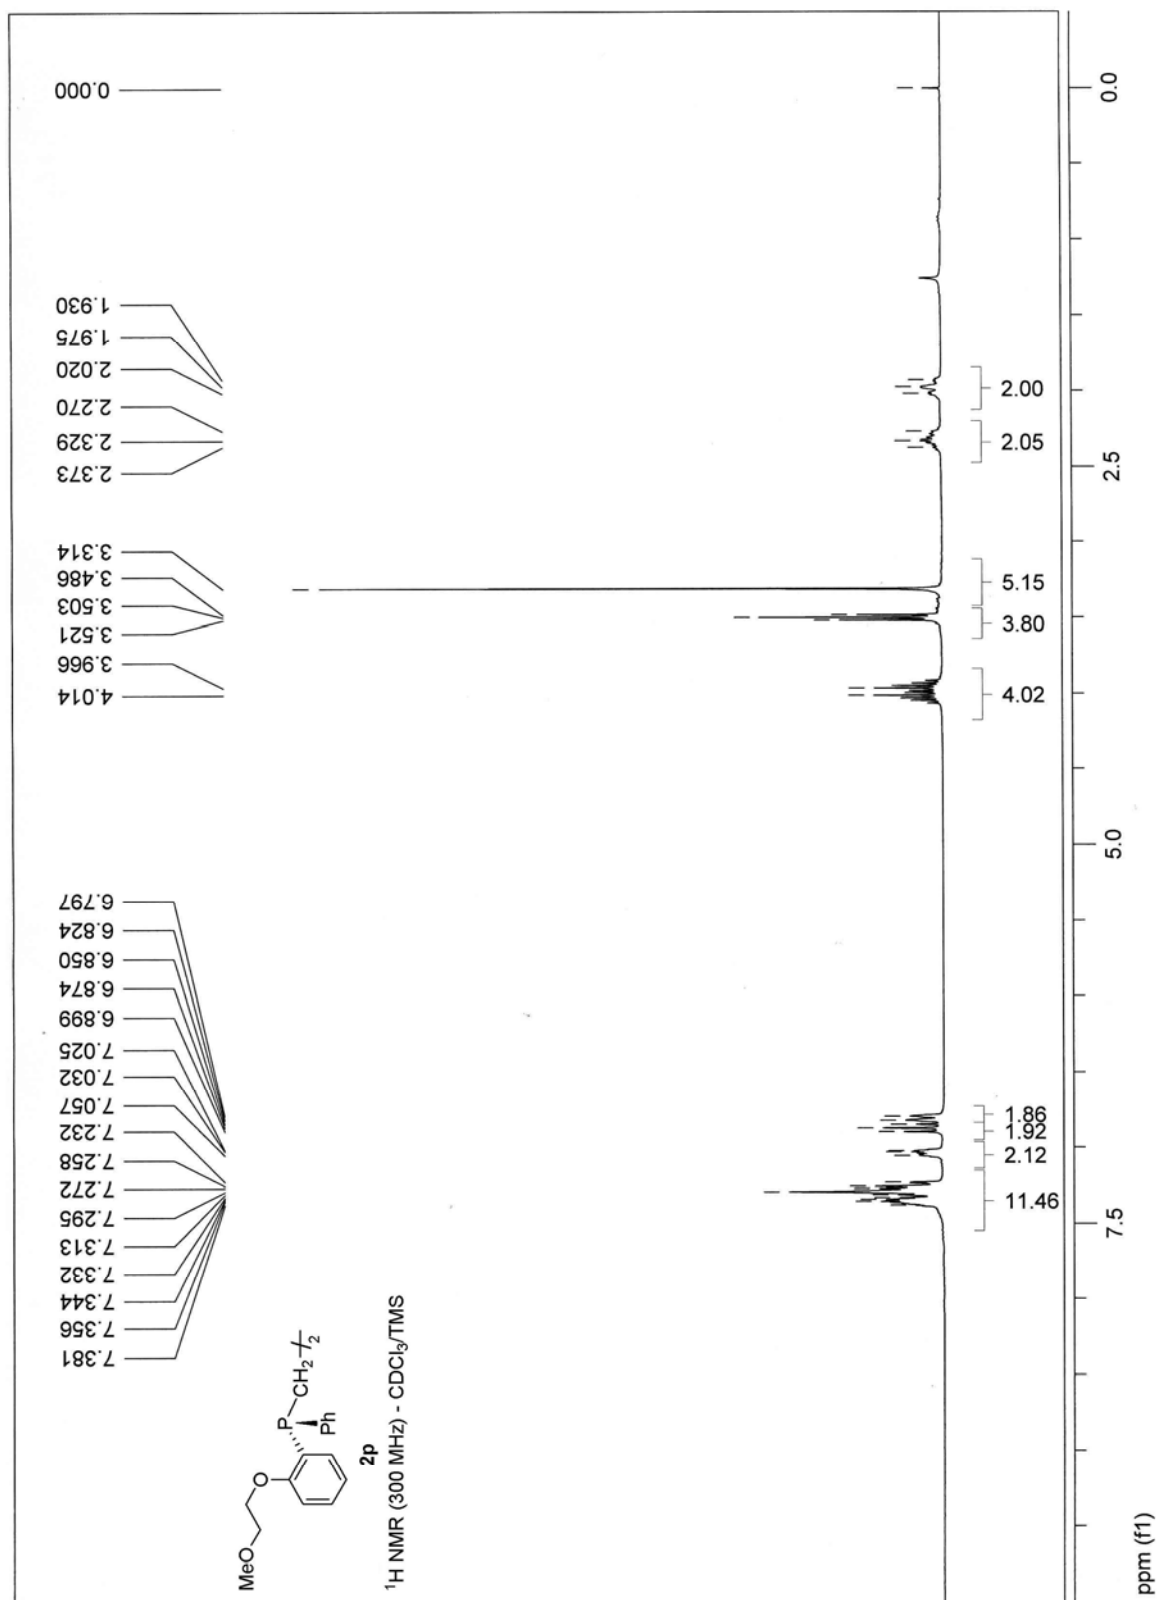

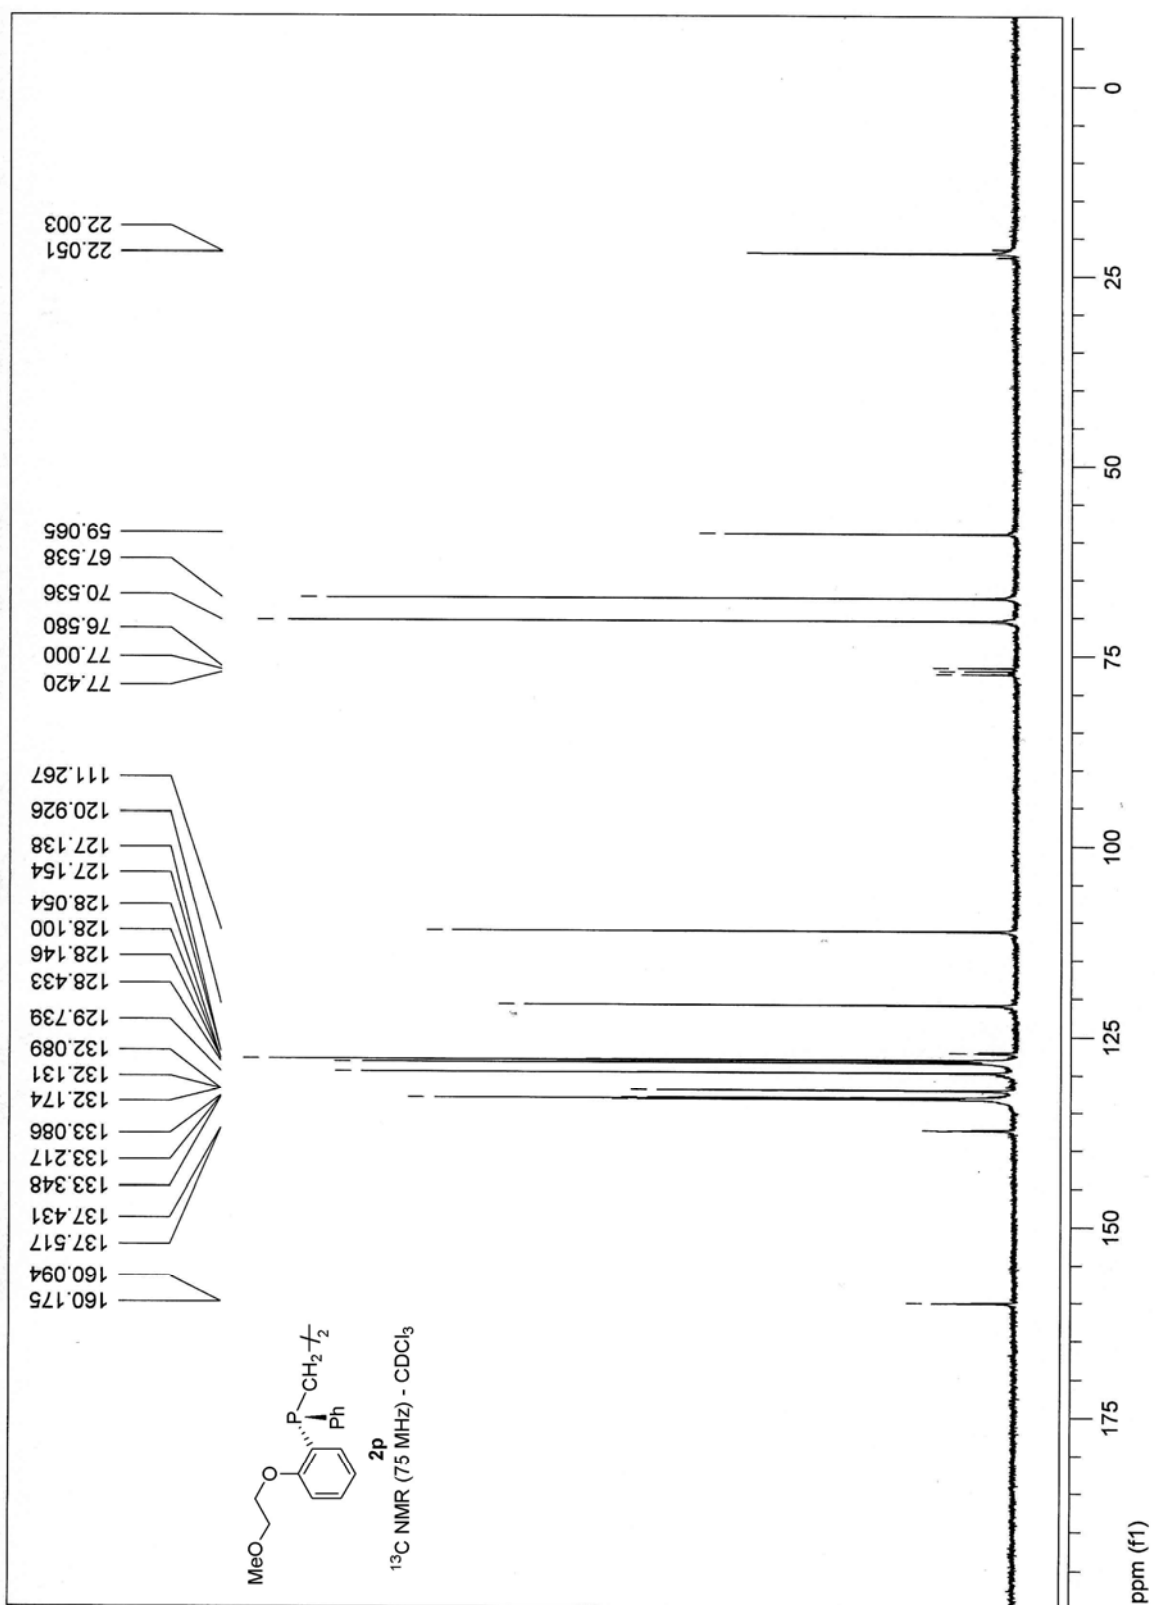

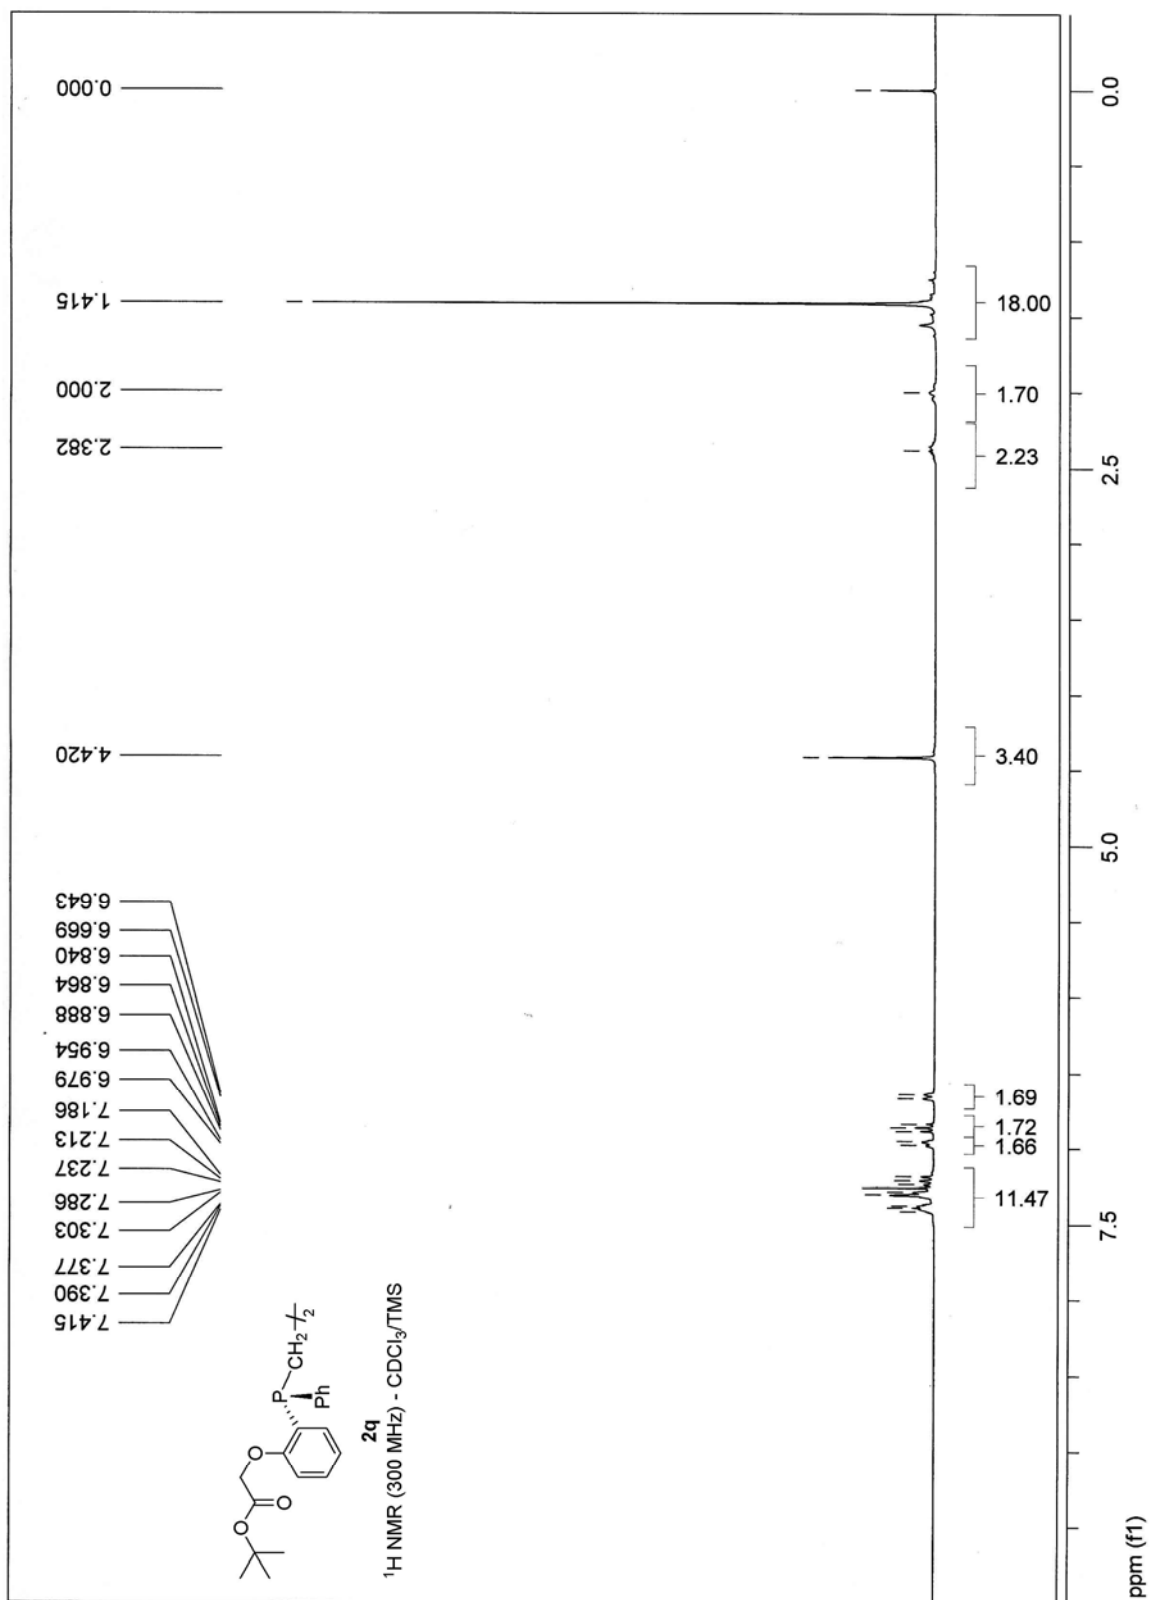

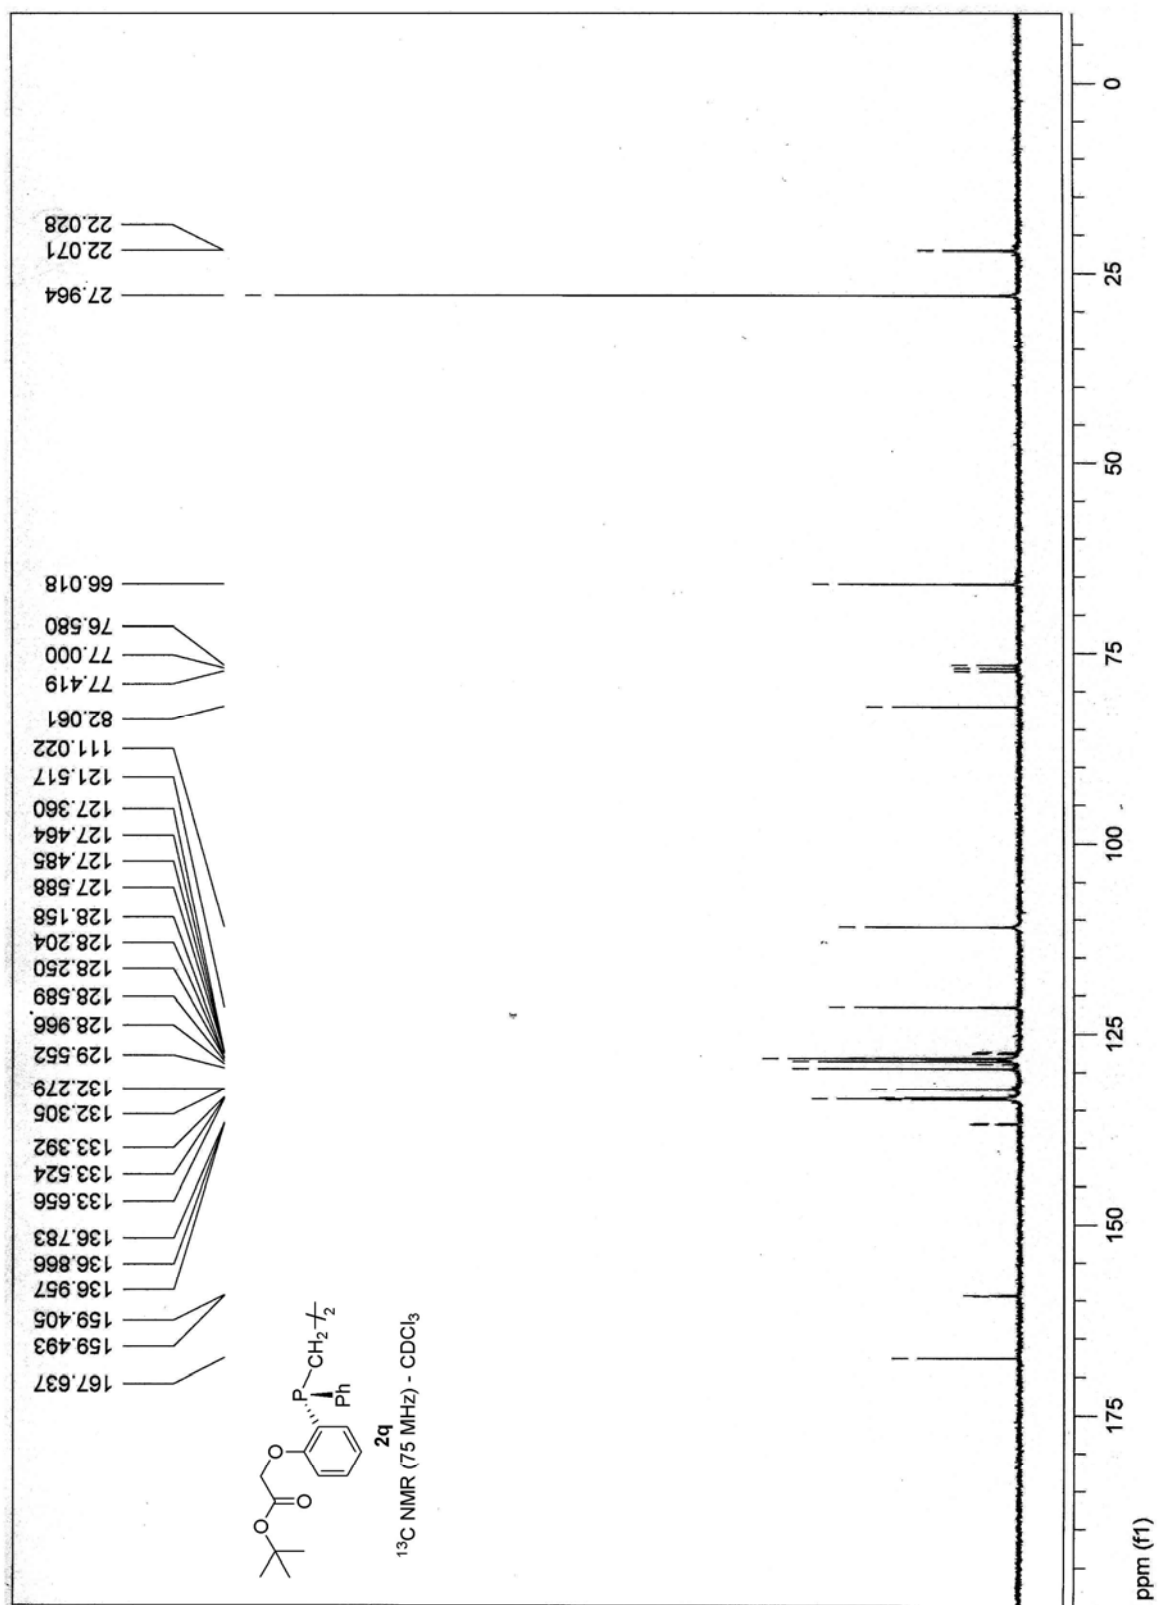



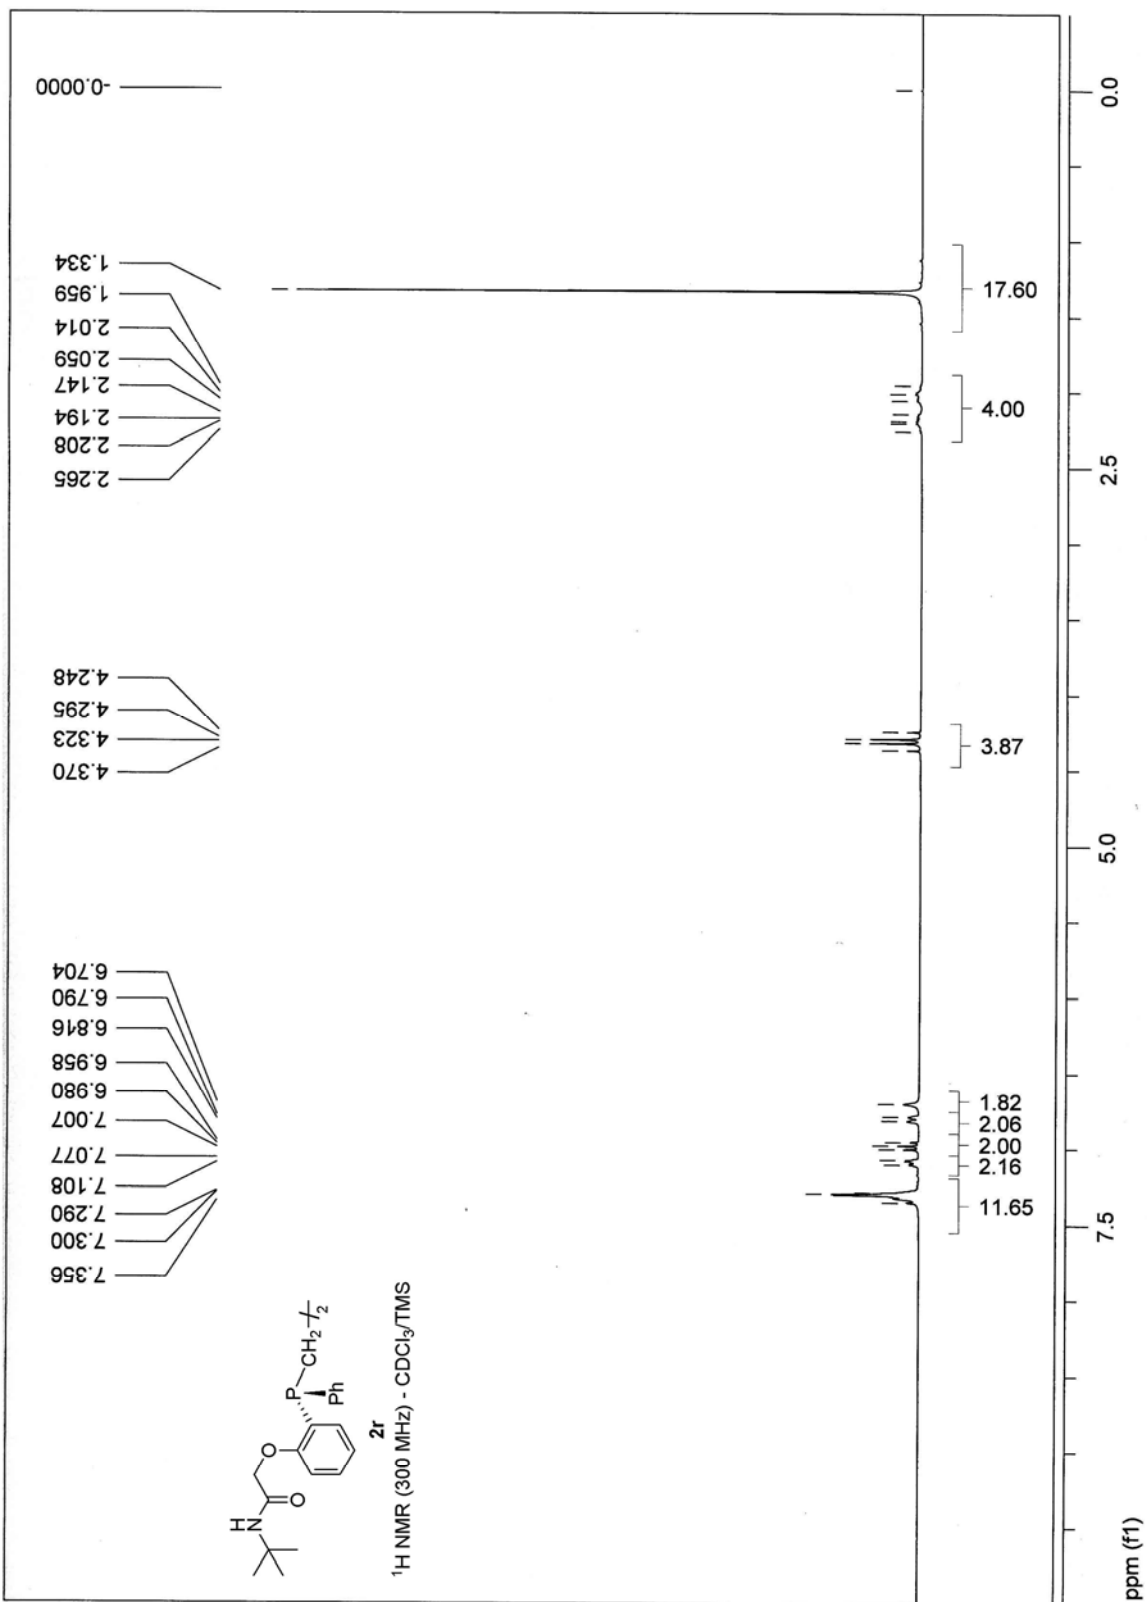

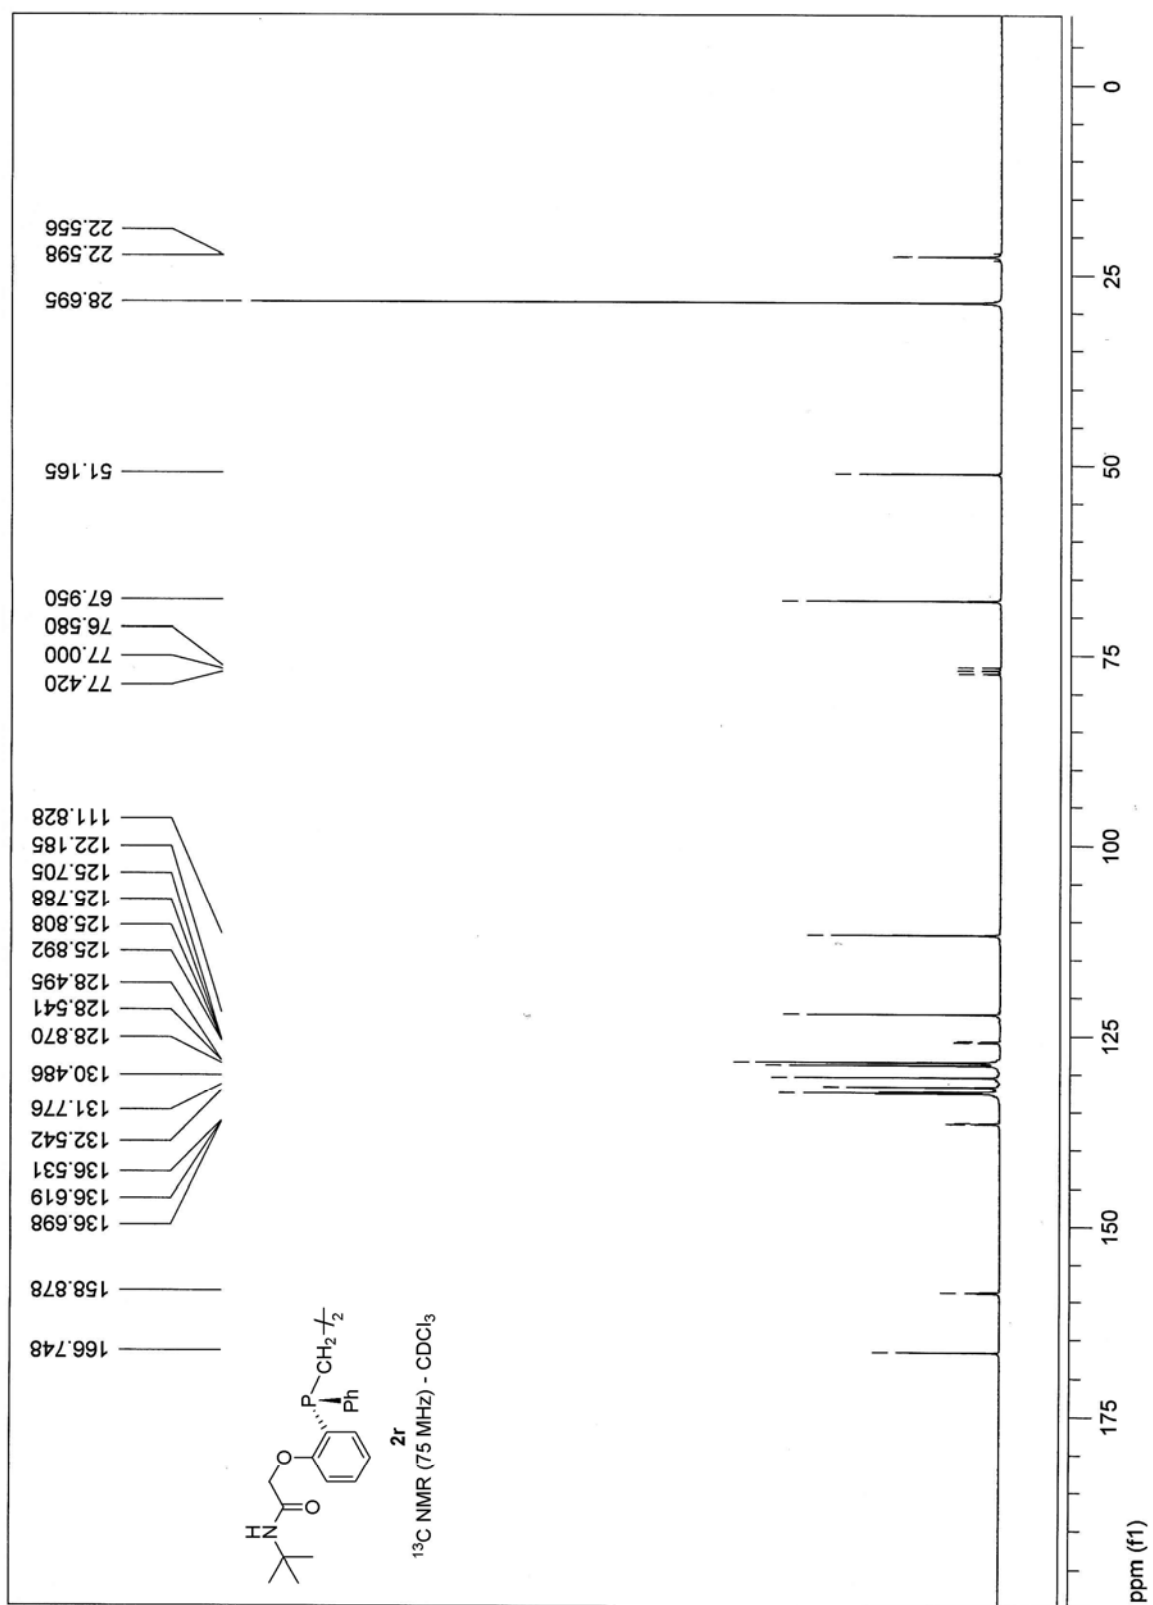

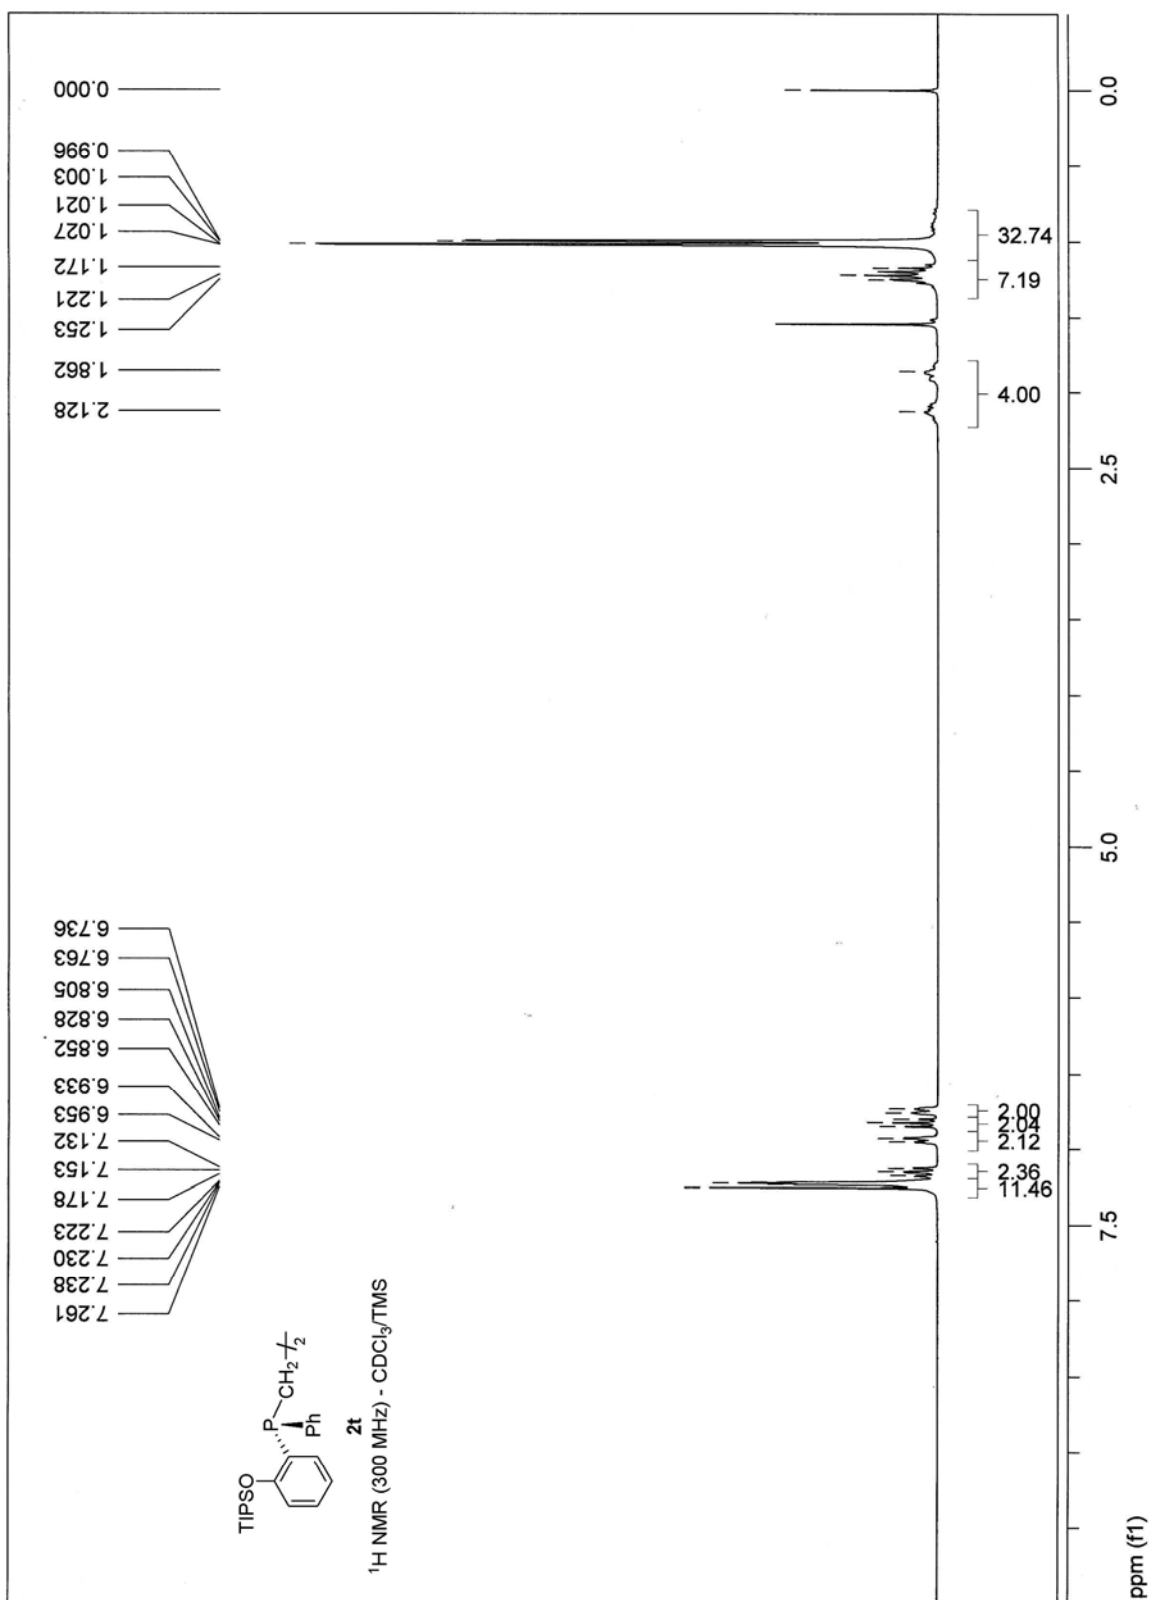

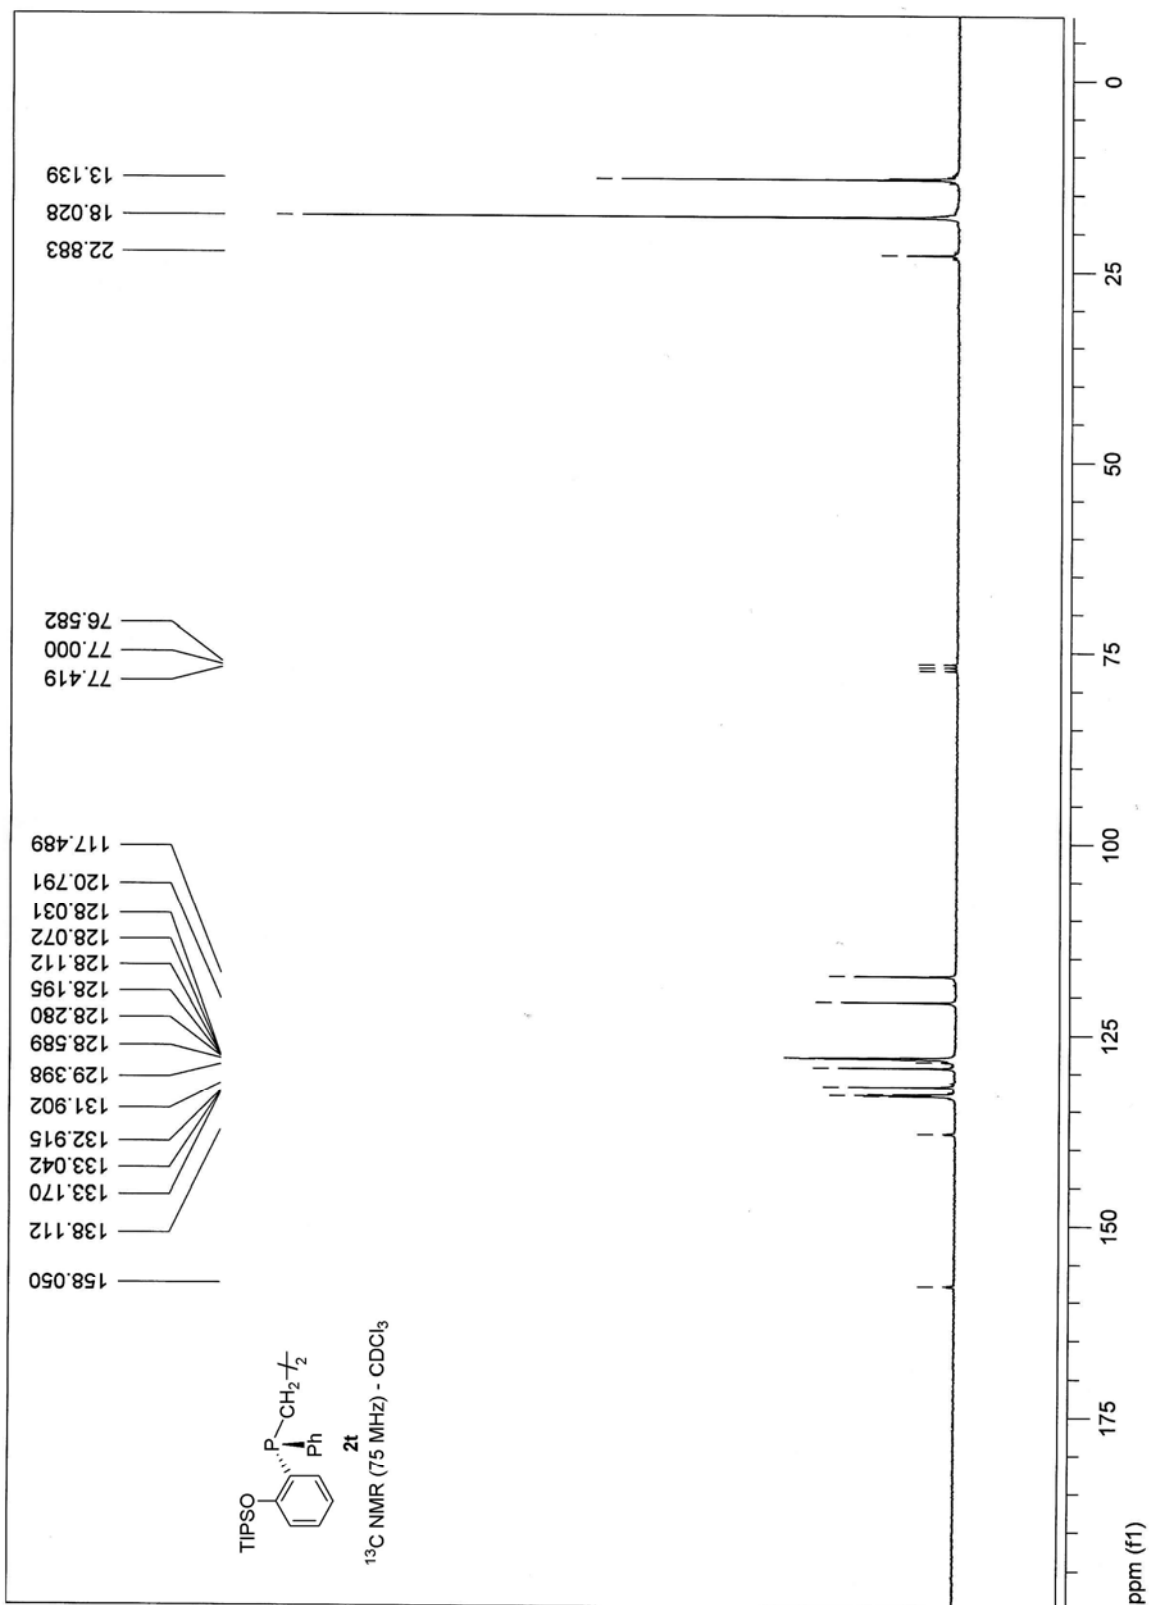

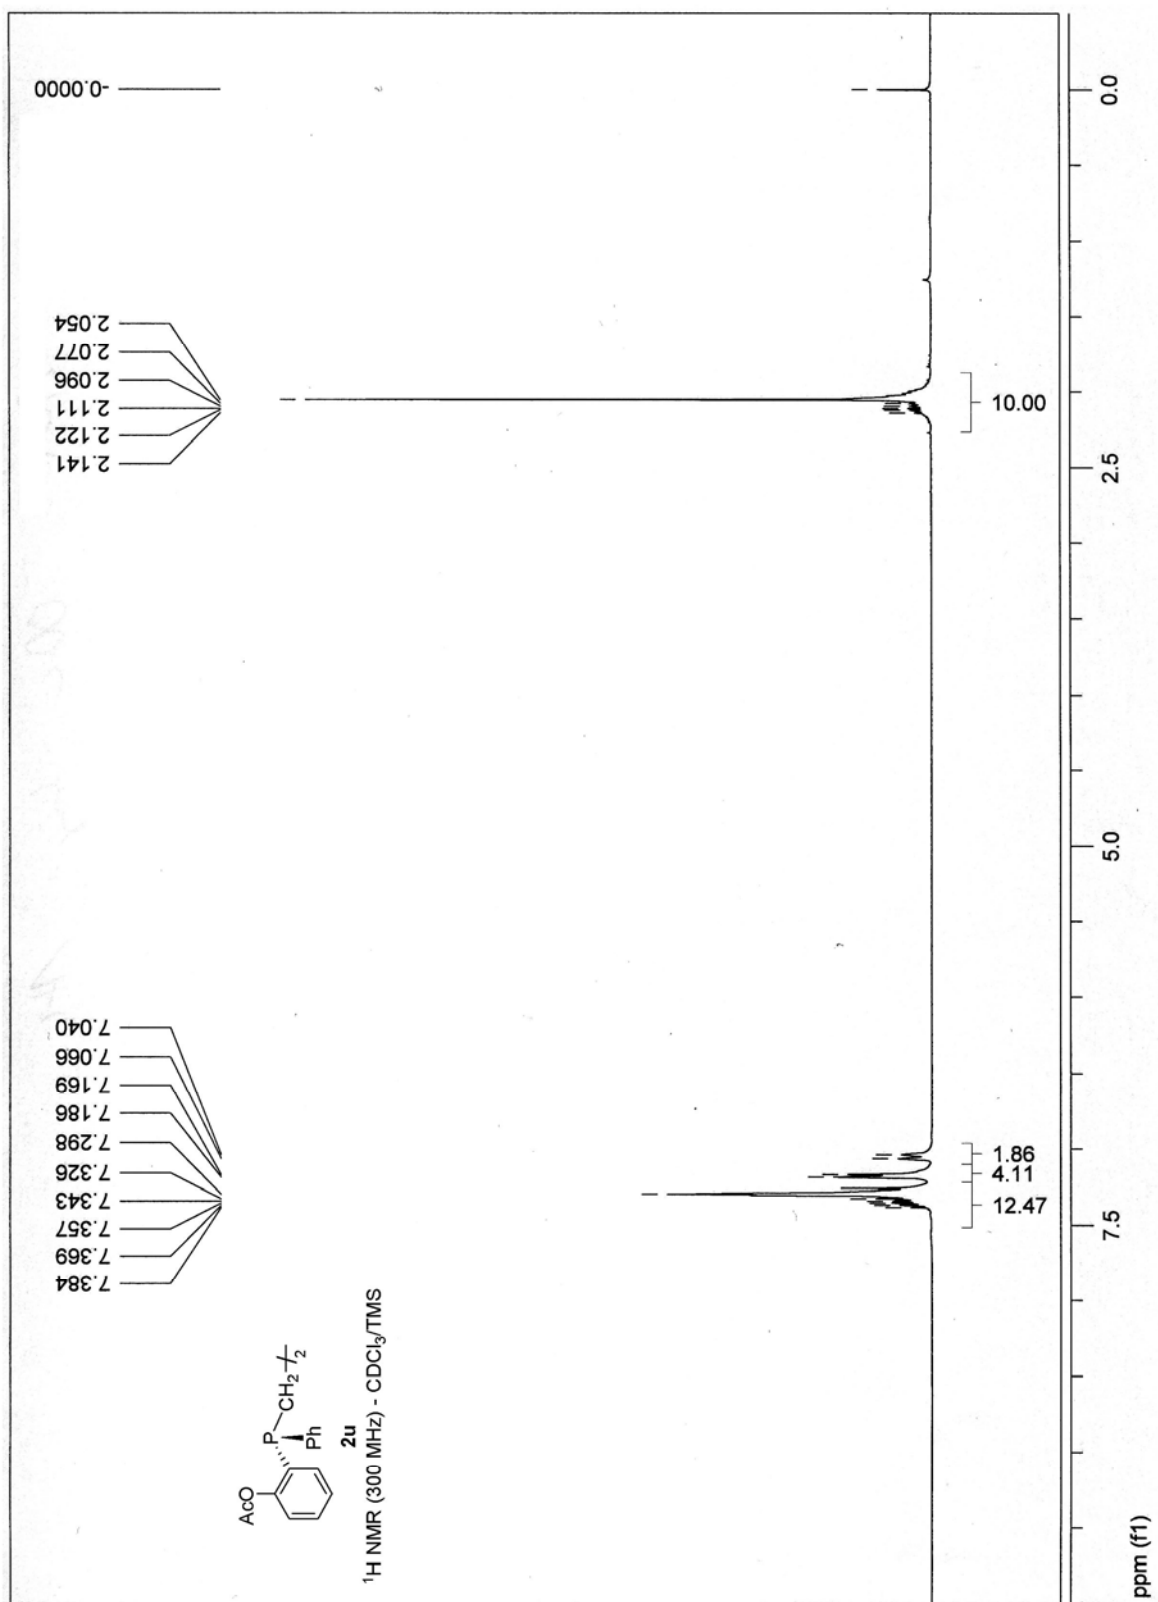

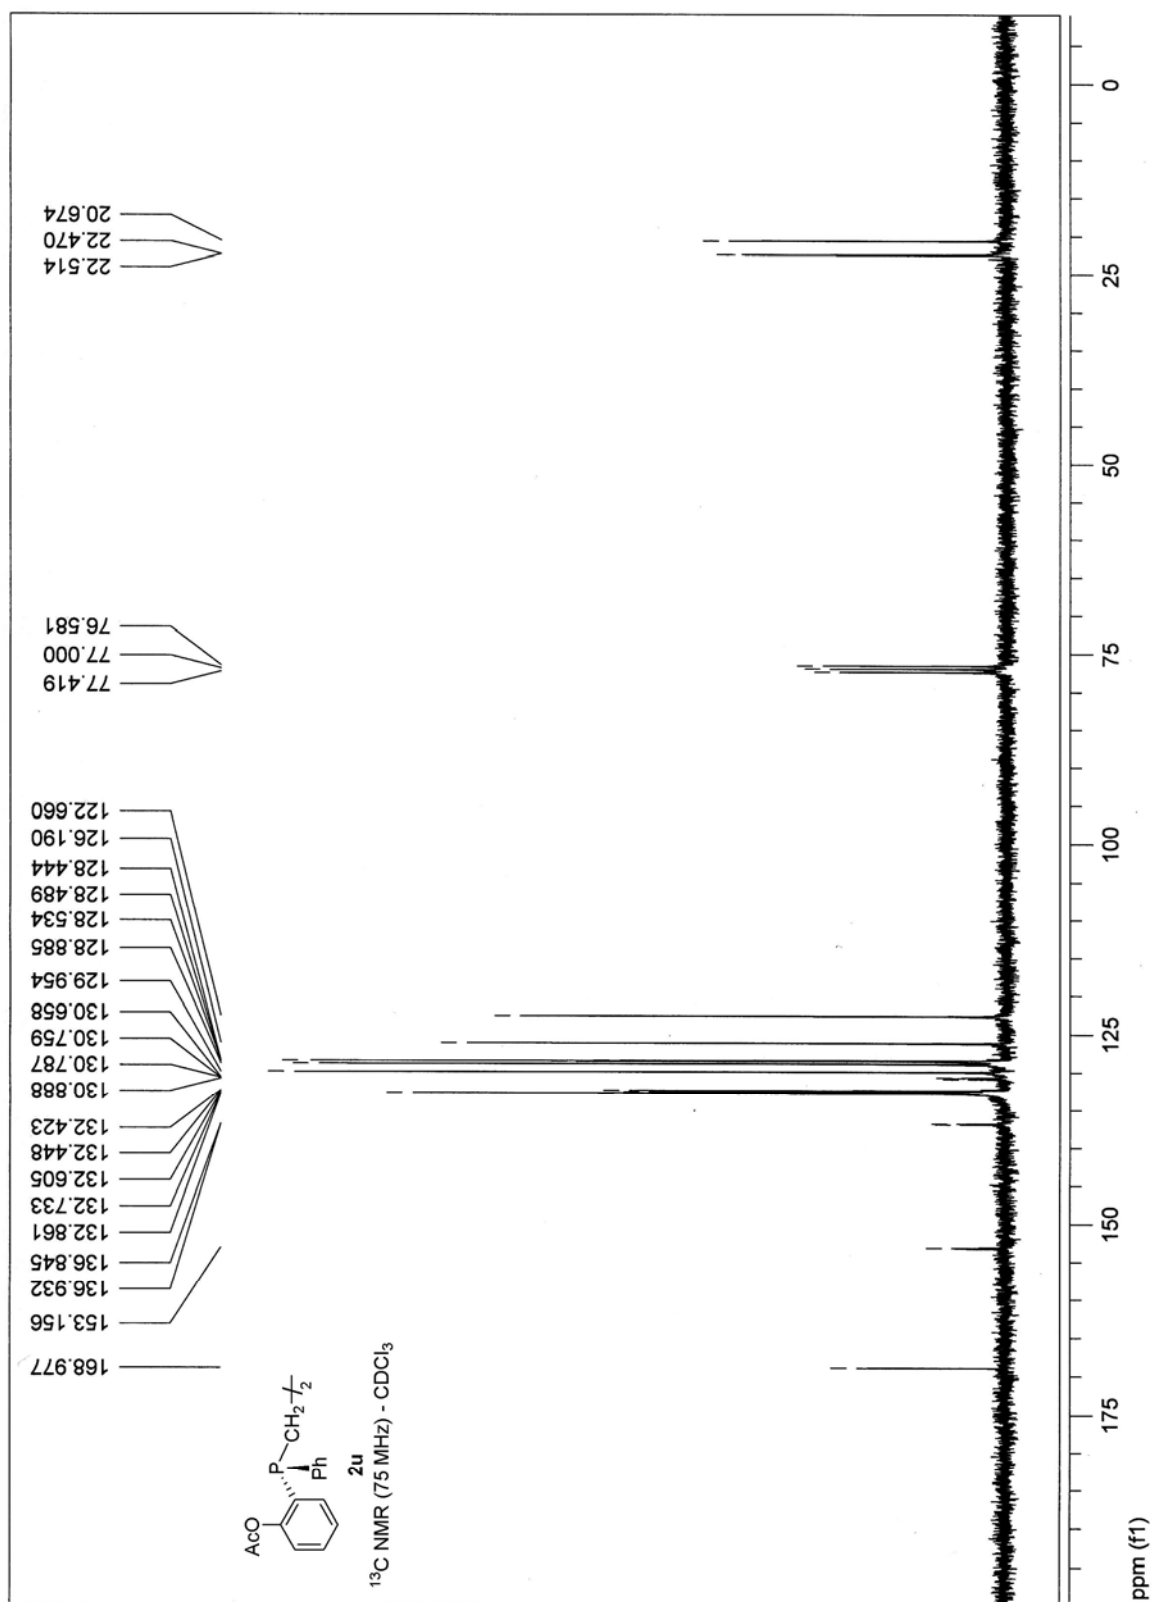

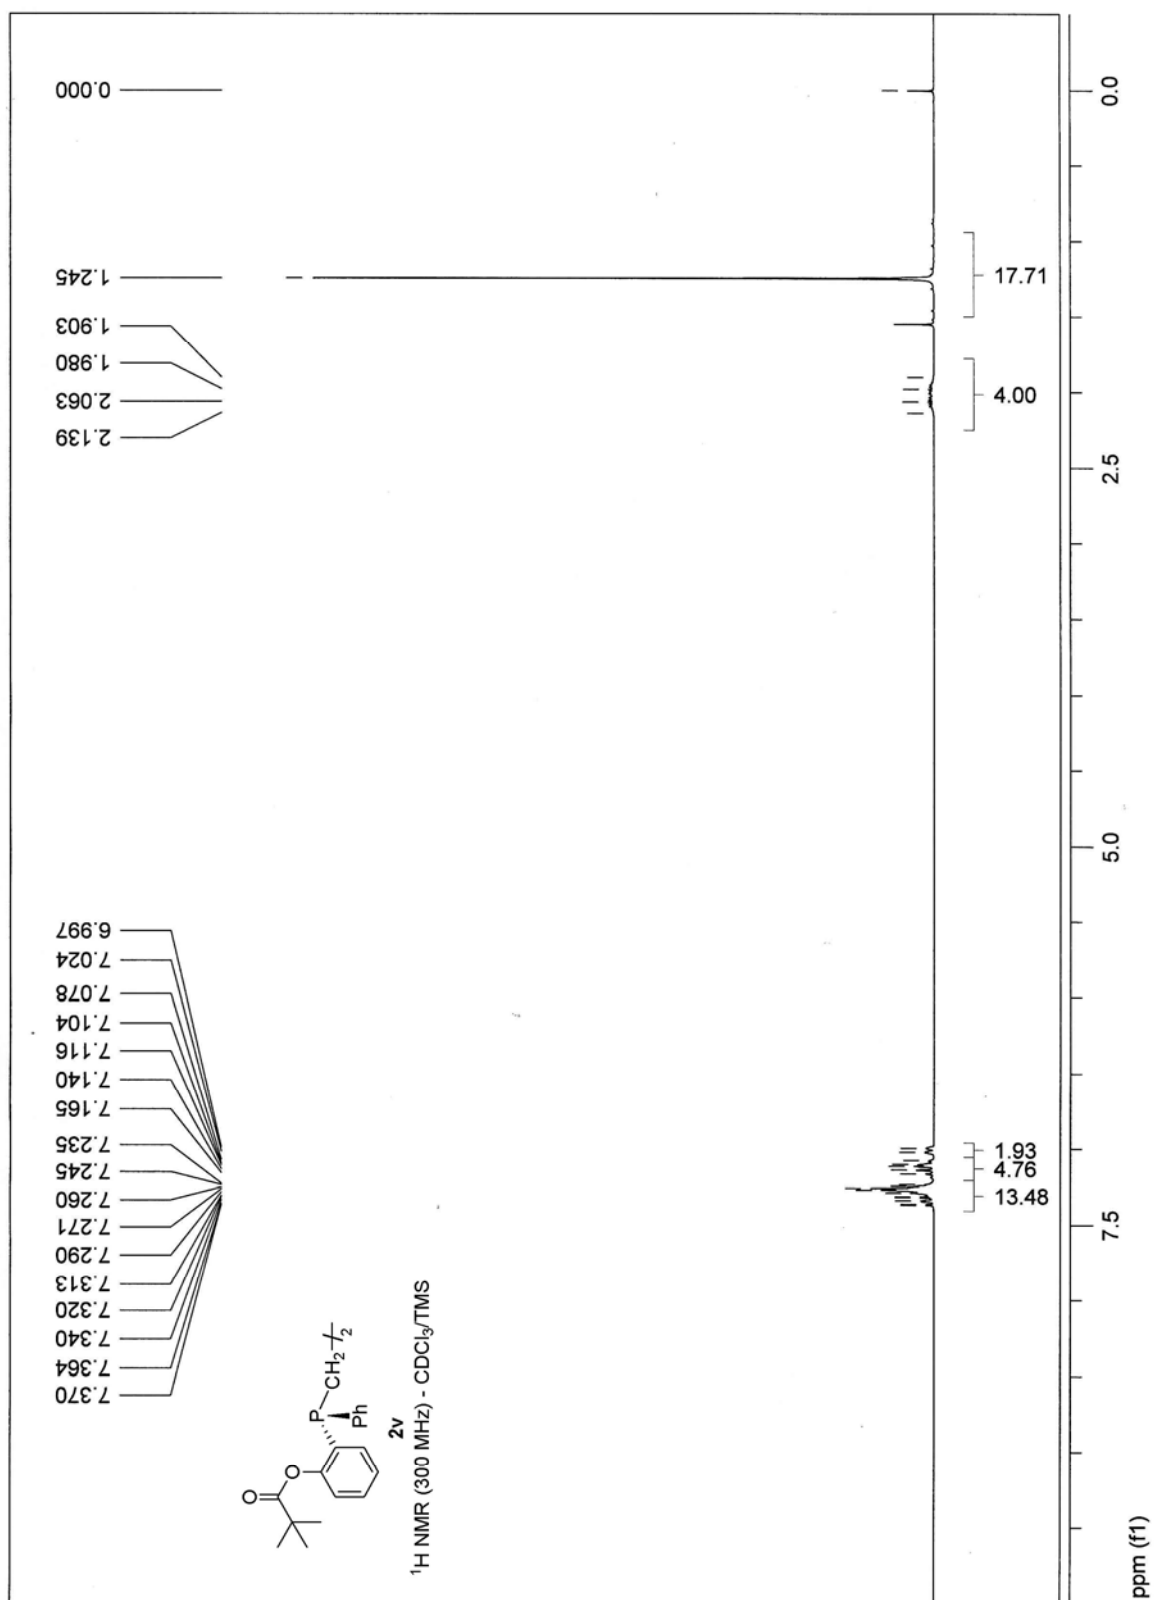

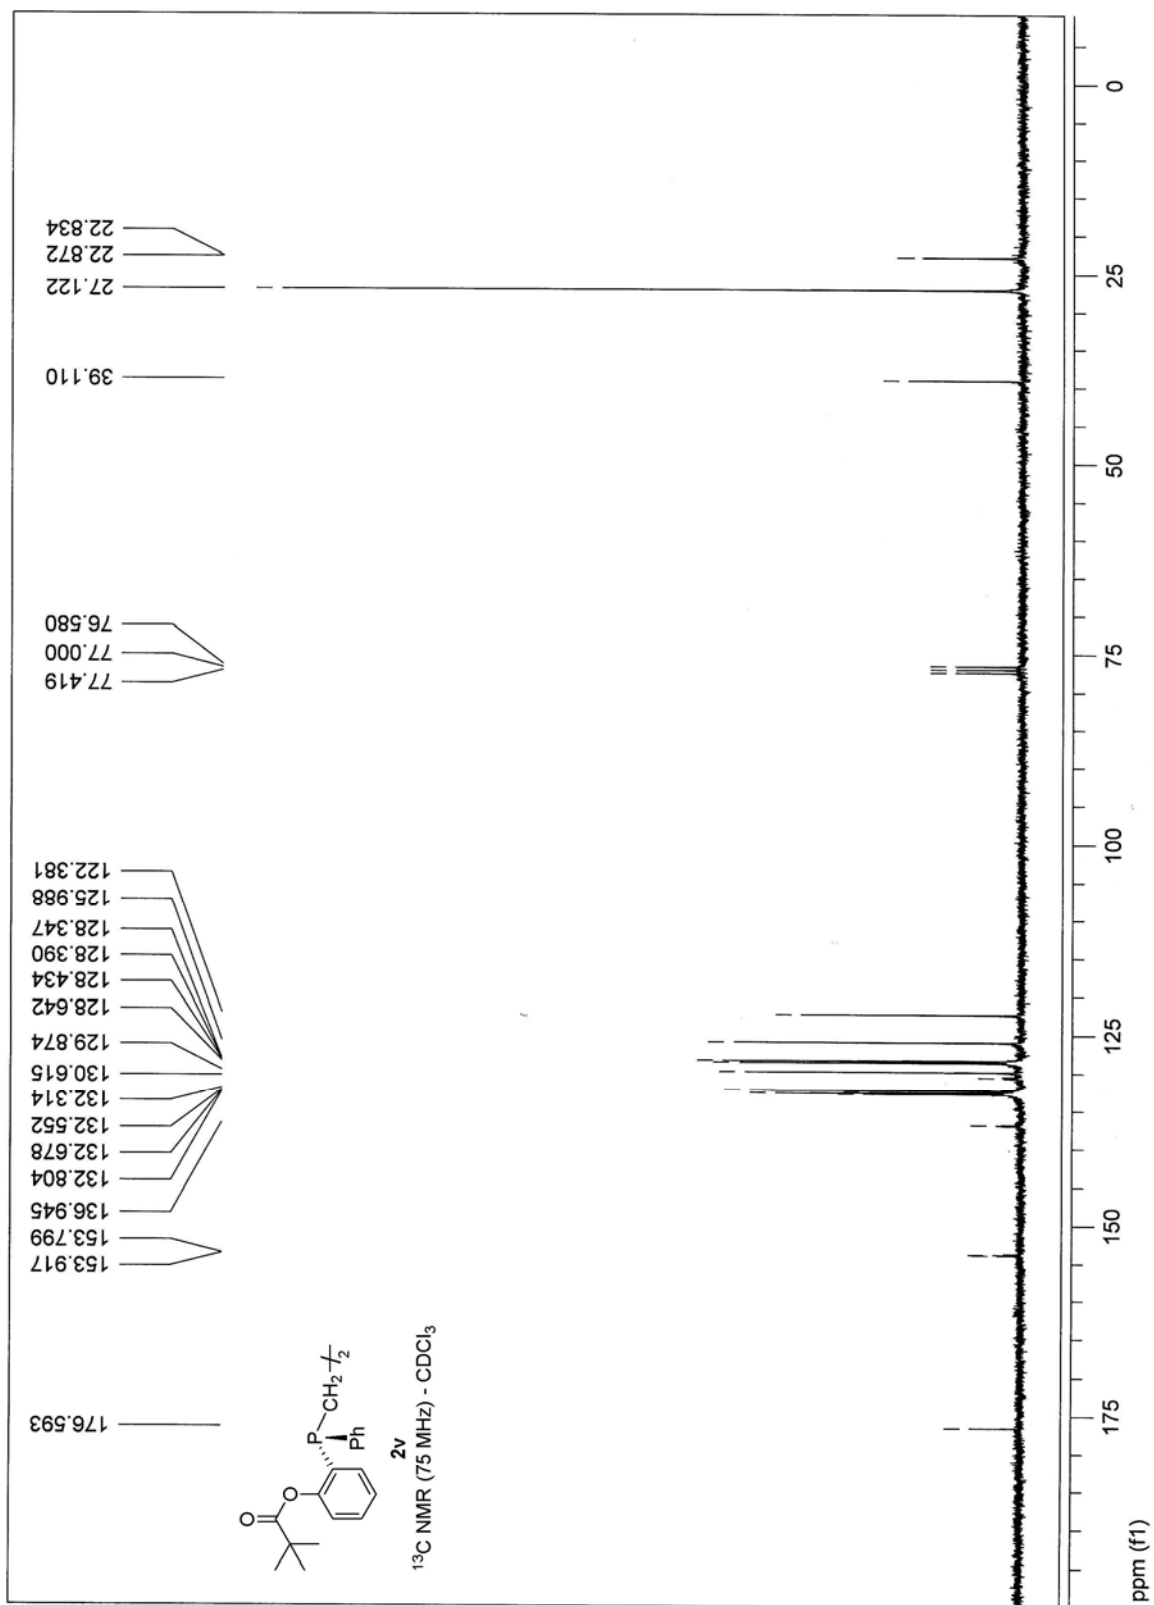



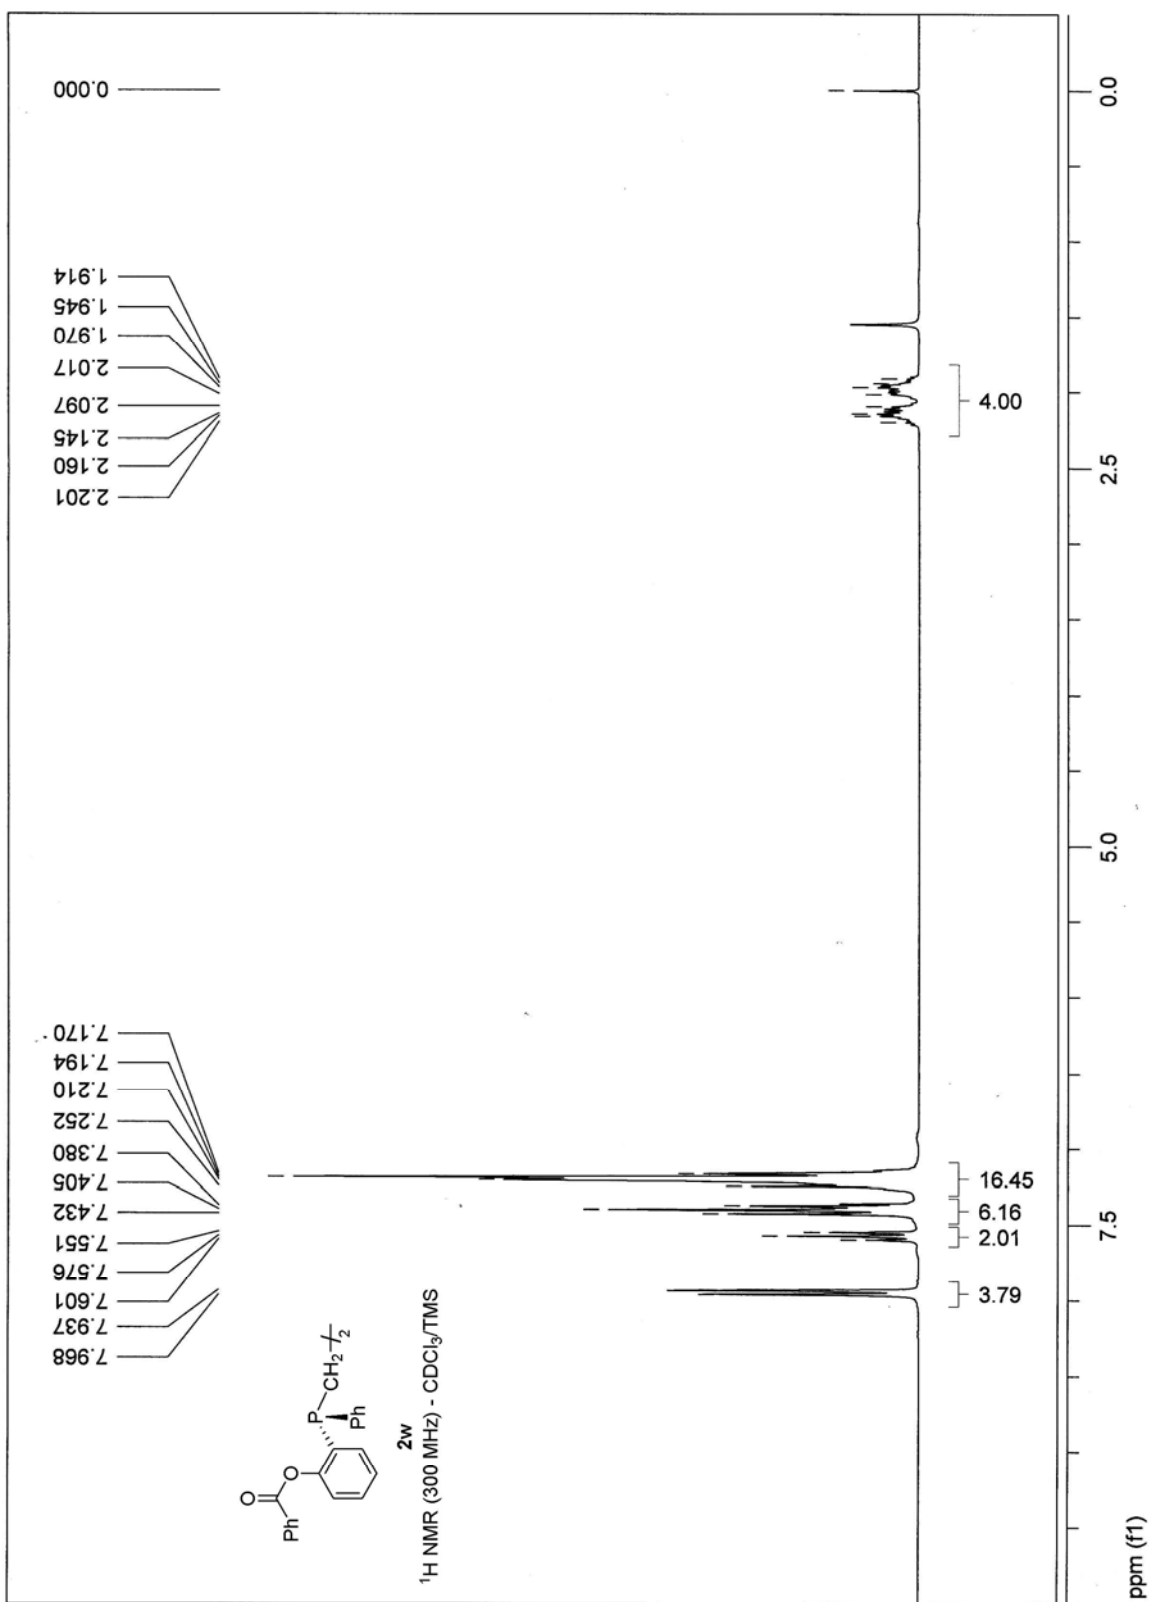

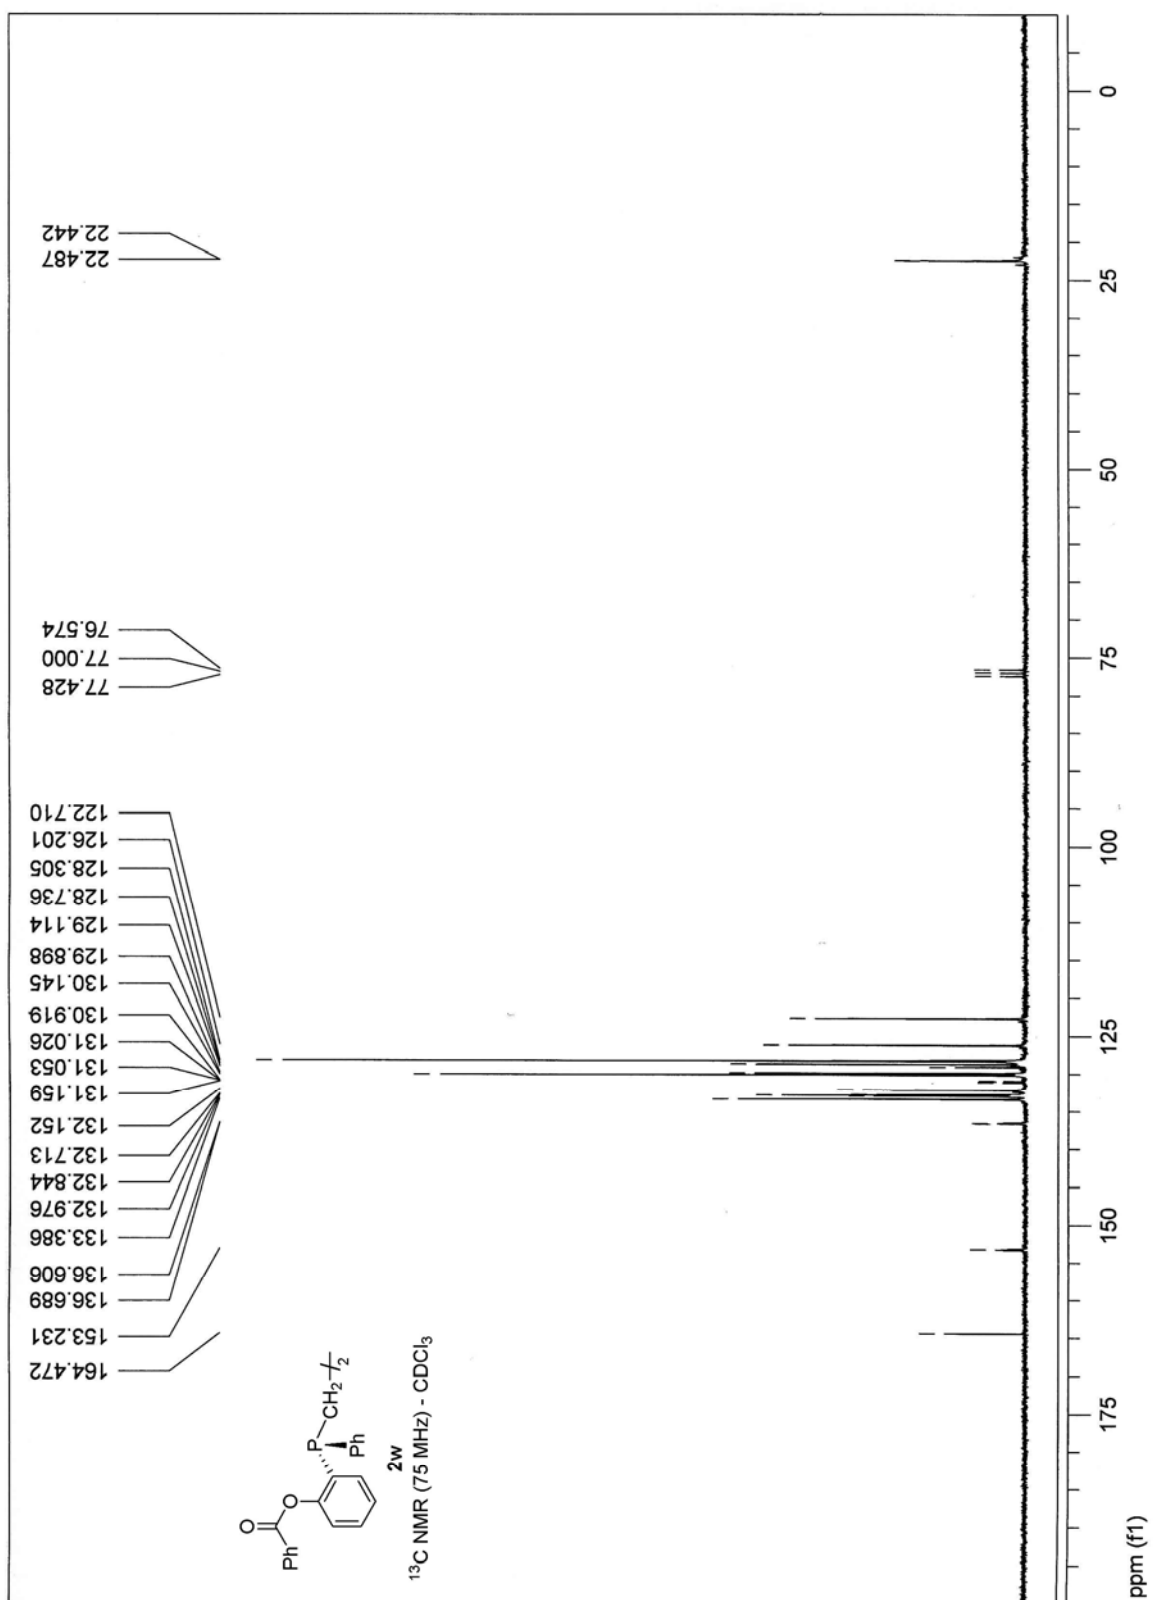

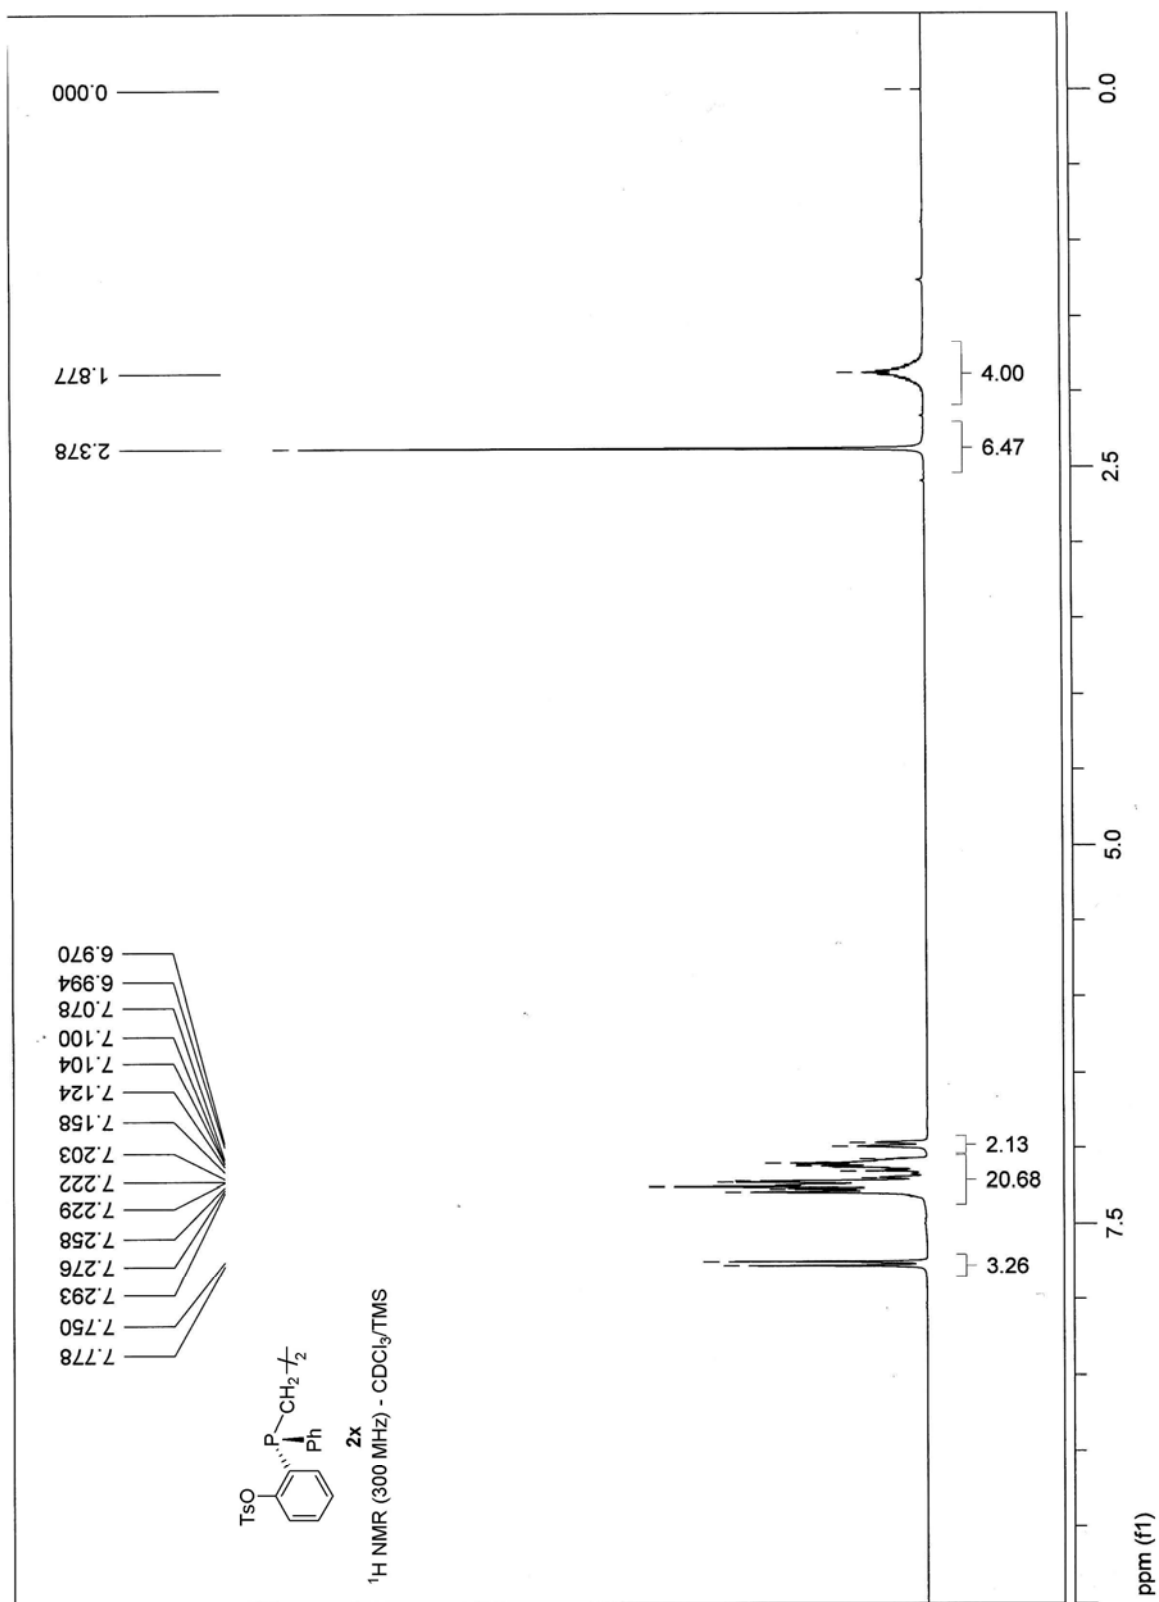

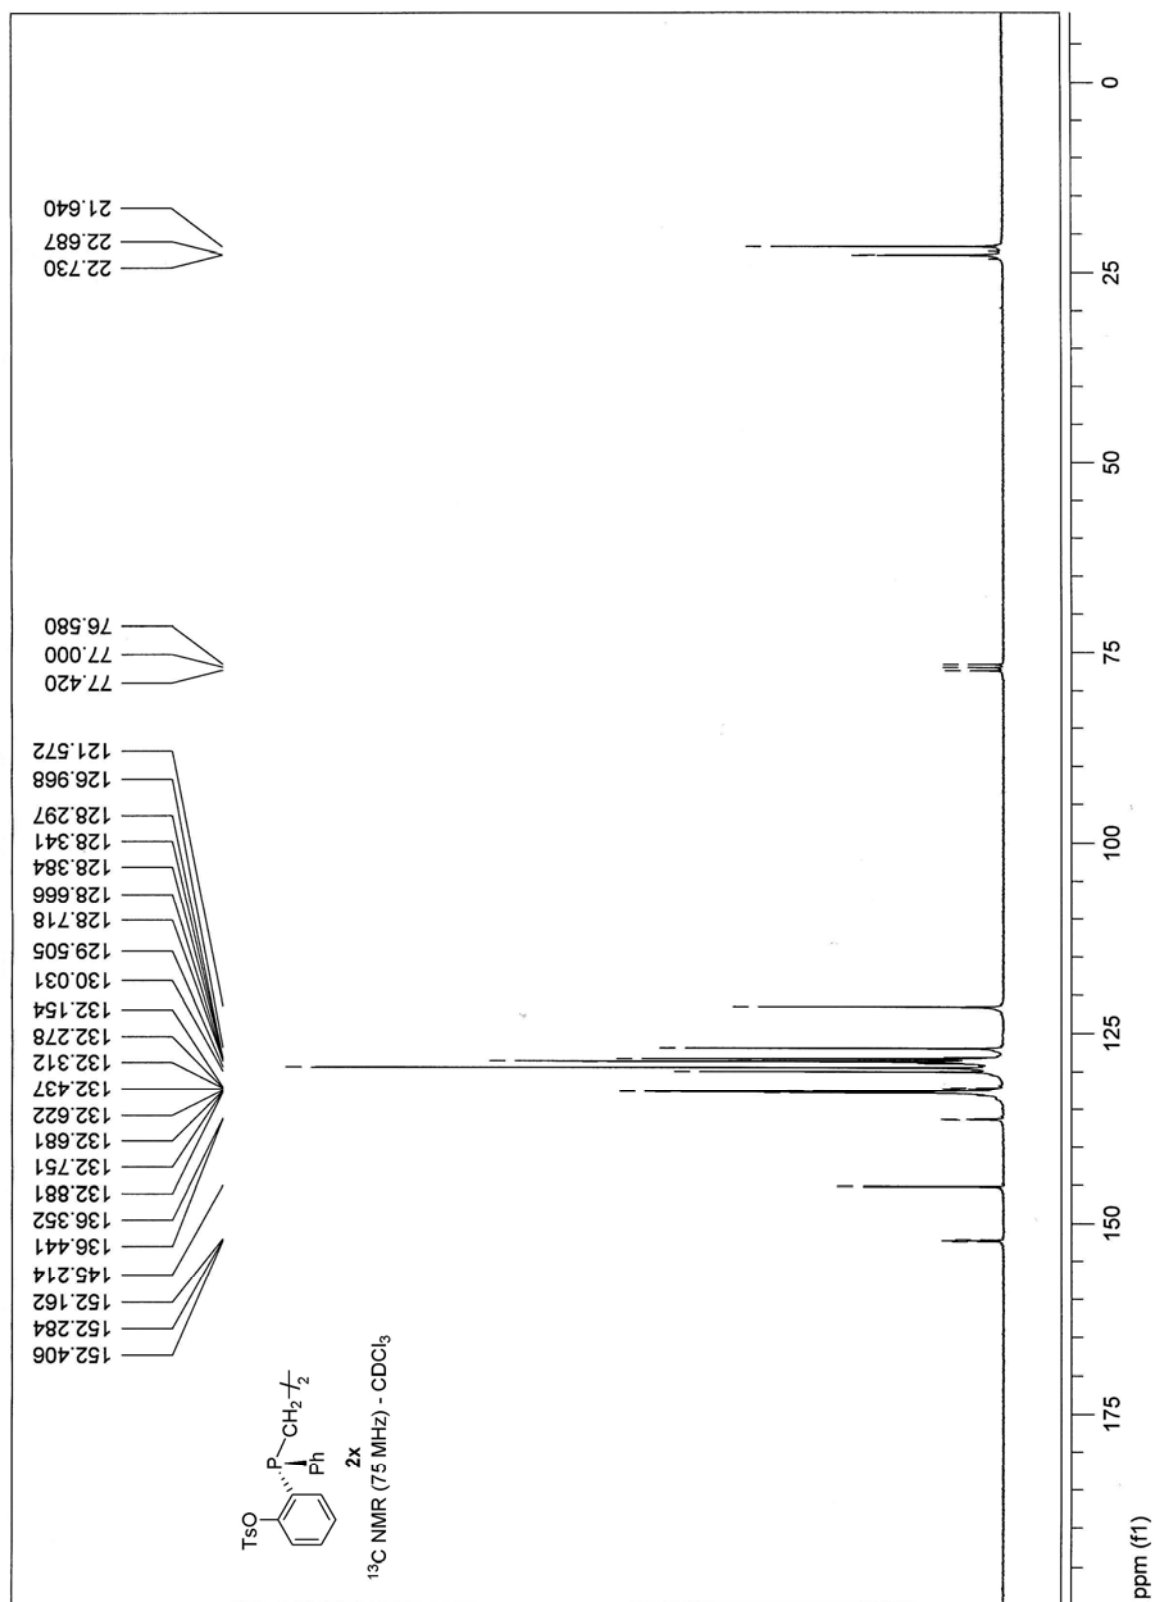

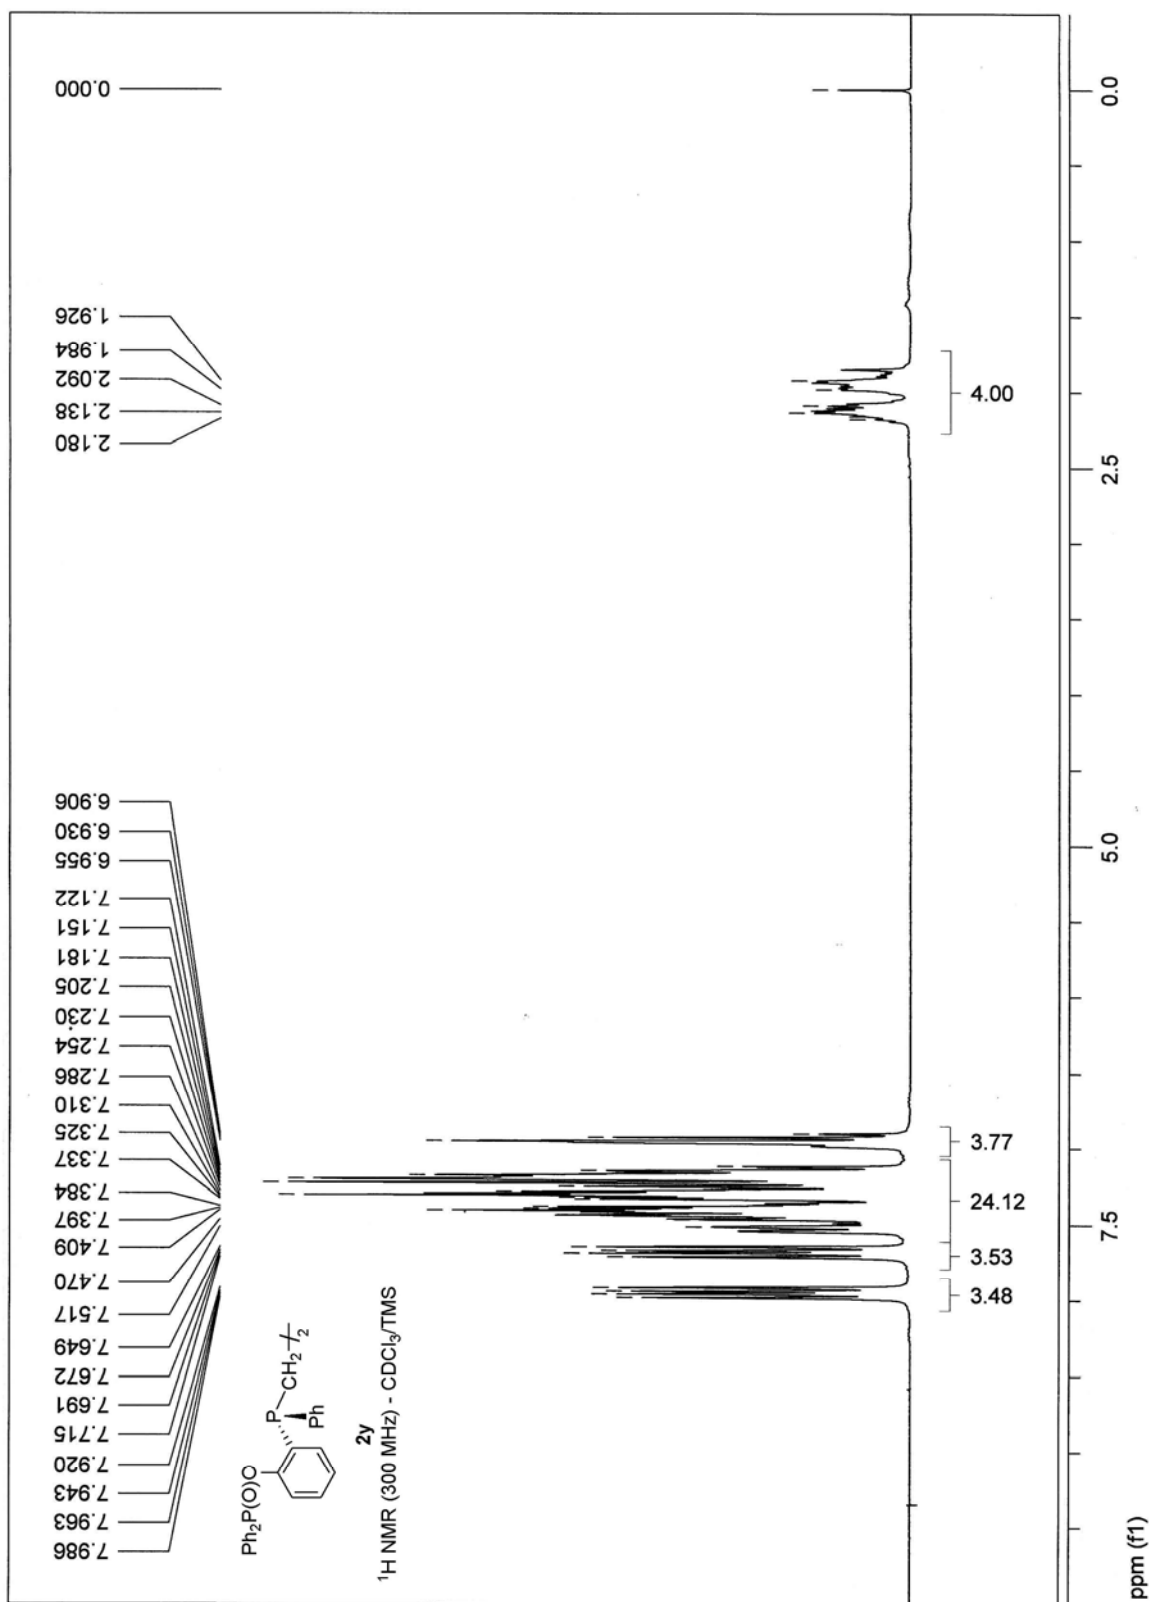

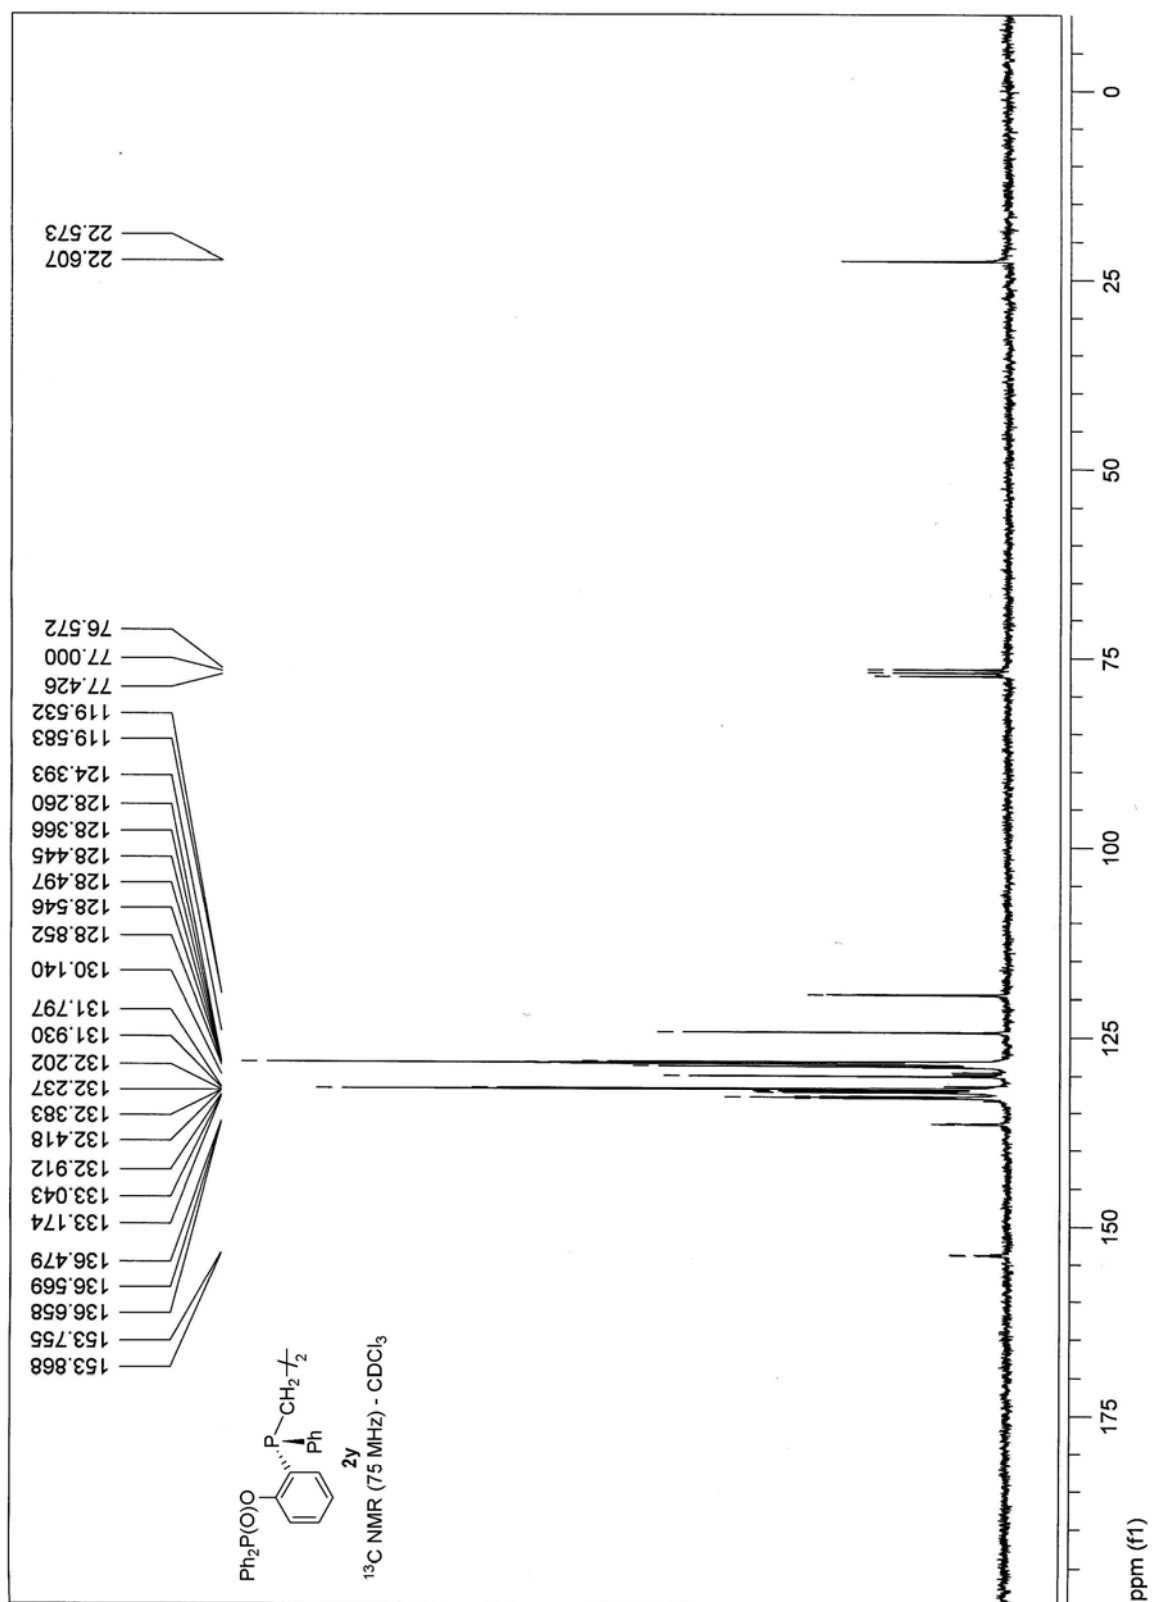

Supplement: c1ob05364g_2.pdf [file c1ob05364g_2.pdf]
