# Supplementary material for: Profiling the tuneable R-SMS-Phos structure in the rhodium(i)-catalyzed hydrogenation of olefins: the last stand?
Source: Royal Society of Chemistry journal article supplement (doi:10.1039/c1ob05364g), 2011-01-01
Supplement: c1ob05364g.pdf [file c1ob05364g.pdf]

## Supporting Information

# Profiling the Tuneable R-SMS-Phos Structure in the Rhodium(I)-Catalyzed Hydrogenation of Olefins: The Last Stand?

Michel Stephan,<sup>\*a,b</sup> Damjan Šterk,<sup>a</sup> Borut Zupančič<sup>a</sup> and Barbara Mohar<sup>a</sup>

<sup>a</sup> National Institute of Chemistry, Hajdrihova 19, SI-1001 Ljubljana, Slovenia

<sup>b</sup> PhosPhoenix SARL, 115, rue de l'Abbé Groult, F-75015 Paris, France

Fax: +33 1 48283011; e-mail: mstephan@phosphoenix.com

## Table of Contents

|                                                   |    |
|---------------------------------------------------|----|
| Experimental Procedures .....                     | S1 |
| <sup>1</sup> H, <sup>13</sup> C NMR Spectra ..... | S9 |

## Experimental Procedures

**General.** All operations were conducted under N<sub>2</sub> or Ar atmosphere using anhydrous and degassed solvents. <sup>1</sup>H (300 MHz, internal Me<sub>4</sub>Si), <sup>13</sup>C (75 MHz, internal CDCl<sub>3</sub>), and <sup>31</sup>P NMR (120 MHz, external 85% H<sub>3</sub>PO<sub>4</sub>) were recorded for solutions in CDCl<sub>3</sub> if not stated otherwise.

The following compounds were prepared according to literature procedures: precursor **1a** (from oxazaPB)<sup>1a</sup>, ligands (and their precursors **1**): **2d**,<sup>1b</sup> **2e–g,o**,<sup>1c</sup> **2h,j,k,m,n**<sup>1d</sup>; non-commercial olefins: methyl (*Z*)-3-acetamidobut-2-enoate (methyl β-acetamidocrotonate, **S3**) and methyl (*E*)-3-acetamidobut-2-enoate (**S4**),<sup>2</sup> α-acetamidostyrene (*N*-(1-phenylvinyl)acetamide, **S5**)<sup>3</sup>.

### (*R<sub>P</sub>*,*R<sub>P</sub>*)-1,2-Bis[*o*-hydroxyphenyl](phenyl)phosphino-*P*-borane]ethane (**1a**)<sup>1a</sup> from (*R<sub>P</sub>*,*R<sub>P</sub>*)-DiPAMP

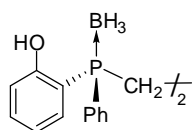

**(2b) - Scheme 1, step e:** To a cold (−20 °C) solution of (*R<sub>P</sub>*,*R<sub>P</sub>*)-DiPAMP (**2b**) (0.50 g, 1.1 mmol) in CH<sub>2</sub>Cl<sub>2</sub> (20 mL) was added BBr<sub>3</sub> (750 μL, 7 equiv.). After stirring at r.t. for 1 h, MeOH (20 mL) was added at 0 °C and the mixture refluxed for 2 h monitoring the reaction by <sup>31</sup>P NMR. The mixture was concentrated and carefully neutralized with 0.1 M NaOH. (*R<sub>P</sub>*,*R<sub>P</sub>*)-SMS-Phos (**2a**) was extracted with CH<sub>2</sub>Cl<sub>2</sub>, dried and the residue was filtered through a pad of silica gel eluting with toluene/EtOAc 8:2 (R<sub>f</sub>: 0.48) yielding a white powder (0.44 g, 93%): mp 130–132 °C; [α]<sub>D</sub><sup>25</sup>: +79.7 (c 1.0 in MeOH); <sup>1</sup>H NMR: δ = 2.15 (m, 4H; 2 CH<sub>2</sub>), 6.45 (br s, 2H; 2 OH), 6.90 (m, 4H; Ar-H), 7.05 (m, 2H; Ar-H), 7.24–7.32 (m, 12H; Ar-H); <sup>13</sup>C NMR: δ = 22.4 (m), 115.5, 119.9 (m), 121.1 (m), 128.5 (m), 128.6, 131.6, 131.8 (d, *J*(C,P) = 9 Hz), 132.8 (m), 136.4 (m), 159.9 (m); <sup>31</sup>P NMR: δ = −39.5 (s); MS (EI): *m/z* (%): 430 (100) [*M*<sup>+</sup>]; HR-MS (EI): *m/z* = 430.126, calcd. for C<sub>26</sub>H<sub>24</sub>O<sub>2</sub>P<sub>2</sub> [*M*<sup>+</sup>]: 430.125; anal. calcd. for C<sub>26</sub>H<sub>24</sub>O<sub>2</sub>P<sub>2</sub> (430.42): C 72.55, H 5.62; found: C 72.45, H 5.71.

**Scheme 1, step c:** To (*R<sub>P</sub>*,*R<sub>P</sub>*)-SMS-Phos (**2a**) (0.40 g, 0.92 mmol) in THF (30 mL) was added BH<sub>3</sub>·Me<sub>2</sub>S (2 mmol) at 0 °C and the mixture left to warm up to r.t., then concentrated and washed with hexane/CH<sub>2</sub>Cl<sub>2</sub> 95:5 to yield (*R<sub>P</sub>*,*R<sub>P</sub>*)-**1a** (0.41 g, 97%): mp 194–196 °C; R<sub>f</sub>: 0.33 (toluene/EtOAc 9:1); [α]<sub>D</sub><sup>25</sup>: +26.6 (c 1.0 in absolute MeOH); <sup>1</sup>H NMR (DMSO-*d*<sub>6</sub>): δ = 0.15–1.40 (m, 6H; 2 BH<sub>3</sub>), 2.50 (m, 4H; 2 CH<sub>2</sub>), 6.80 (d, *J* = 8 Hz, 2H; Ar-H), 6.88 (t, *J* = 8 Hz, 2H; Ar-H), 7.32–7.72 (m, 14H; Ar-H), 10.45 (br s, 2H; 2 OH); <sup>13</sup>C NMR (DMSO-*d*<sub>6</sub>): δ = 17.7 (m), 111.5 (d, *J*(C,P) = 54 Hz), 115.8, 119.3 (m), 128.5 (m), 129.0 (d, *J*(C,P) = 58 Hz), 130.8, 131.3 (m), 134.1, 135.2 (m), 160.0; <sup>31</sup>P NMR (DMSO-*d*<sub>6</sub>): δ

- (a) M. Stephan, B. Modéc and B. Mohar, *Tetrahedron Lett.*, 2011, **52**, 1086–1089; (b) M. Stephan, D. Šterk and B. Mohar, *Adv. Synth. Catal.*, 2009, **351**, 2779–2786; (c) B. Zupančič, B. Mohar and M. Stephan, *Org. Lett.*, 2010, **12**, 1296–1299; (d) B. Zupančič, B. Mohar and M. Stephan, *Org. Lett.*, 2010, **12**, 3022–3025 (therein, **1i** was prepared using 3-bromocyclohexene (= 2-cyclohexenyl bromide)).
- G. Zhu, Z. Chen and X. Zhang, *J. Org. Chem.*, 1999, **64**, 6907–6910.
- M. J. Burk, G. Casy and N. B. Johnson, *J. Org. Chem.*, 1998, **63**, 6084–6085.

= +18.5 (br m); MS (FAB):  $m/z$  (%): 457 (7) [ $M^+ - H$ ]; anal. calcd. for  $C_{26}H_{30}B_2O_2P_2$  (458.08): C 68.17, H 6.60; found: C 68.04, H 6.77.

**General Procedures for the Preparation of 1b,c,l,p-z by Derivatization of 1a (Scheme 1, step a):**

(A) A mixture of **1a** (458 mg, 1 mmol),  $K_2CO_3$  (553 mg, 4 mmol), and the appropriate (substituted)alkyl halide or tosylate (2.5–3 mmol) in acetone (10 mL) was stirred at r.t. or refluxed until TLC showed complete conversion. The mixture was concentrated, filtered through a pad of silica gel eluting with  $CH_2Cl_2$ . The product was recrystallized from hexane/ $CH_2Cl_2$ .

(B) A mixture of **1a** (458 mg, 1 mmol),  $K_2CO_3$  (553 mg, 4 mmol), and the appropriate (substituted)alkyl halide or tosylate (2.5–3 mmol) in DMF (5 mL) was stirred at 40 °C until TLC showed complete conversion. The mixture was concentrated, filtered through a pad of silica gel eluting with  $CH_2Cl_2$ . The product was recrystallized from hexane/ $CH_2Cl_2$ .

(C) To a stirred solution of **1a** (458 mg, 1 mmol) in THF (10 mL) was added NaH (60 mg, 2.5 mmol) at 0 °C. After 15 min the appropriate acid chloride (2.5 mmol) was added and left to stir for 1 h. The mixture was quenched with  $H_2O$  (0.1 mL), concentrated, and the residue was filtered through a pad of silica gel eluting with  $CH_2Cl_2$ . The product was recrystallized from hexane/ $CH_2Cl_2$ .

**( $R_p, R_p$ )-1,2-Bis[(*o*-anisyl)(phenyl)phosphino-*P*-borane]ethane (( $R_p, R_p$ )-**1b**).**

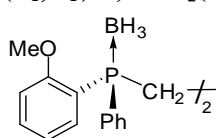

Prepared according to the general procedure (A) from ( $R_p, R_p$ )-**1a** using iodomethane (0.85 g, 0.37 mL, 6.0 mmol). Colorless crystals (465 mg, 96%):  $^1H$  NMR:  $\delta$  = 0.25–1.70 (br m, 6H; 2  $BH_3$ ), 2.59 (m, 4H; 2  $CH_2$ ), 3.61 (s, 6H; 2 Me), 6.80 (m, 2H; Ar-H), 7.03 (m, 2H; Ar-H), 7.32–7.50 (m, 8H; Ar-H), 7.66 (m, 4H; Ar-H), 7.86 (m, 2H; Ar-H).

**( $S_p, S_p$ )-1,2-Bis[(*o*-anisyl)(phenyl)phosphino-*P*-borane]ethane (( $S_p, S_p$ )-**1b**).**

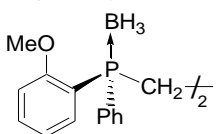

Prepared according to the general procedure (A) from ( $S_p, S_p$ )-**1a** using iodomethane; Colorless crystals.

**( $R_p, R_p$ )-1,2-Bis[(2-ethoxyphenyl)(phenyl)phosphino-*P*-borane]ethane (**1c**).**

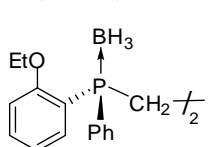

Prepared according to the general procedure (A) from ( $R_p, R_p$ )-**1a** using iodoethane (0.62 g, 0.32 mL, 4.0 mmol). Colorless crystals (485 mg, 94%): mp 158–160 °C;  $R_f$ : 0.72 (toluene/EtOAc 9:1);  $[\alpha]_D^{25}$ : +96.4 (c 1.0 in  $CHCl_3$ );  $^1H$  NMR:  $\delta$  = 0.30–1.70 (br m, 6H; 2  $BH_3$ ), 1.07 (t,  $J$  = 7.1 Hz, 6H; 2 Me), 2.64 (m, 4H; 2  $PCH_2$ ), 3.75 (m, 4H; 2  $CH_2$ ), 6.74 (m, 2H; Ar-H), 7.02 (m, 2H; Ar-H), 7.31–7.48 (m, 8H; Ar-H), 7.63 (m, 4H; Ar-H), 7.91 (m, 2H; Ar-H);  $^{13}C$  NMR:  $\delta$  = 14.2, 17.4 (m), 63.8, 111.0, 114.9 (d,  $J(C,P)$  = 53 Hz), 120.6 (m), 128.3 (m), 129.4 (d,  $J(C,P)$  = 59 Hz), 130.5 (m), 131.7 (m), 133.8, 136.7 (m), 160.6;  $^{31}P$  NMR:  $\delta$  = +19.0 (br m); MS (FAB):  $m/z$  (%): 513 (15) [ $M^+ - H$ ]; anal. calcd. for  $C_{30}H_{38}B_2O_2P_2$  (514.19): C 70.08, H 7.45; found: C 69.96, H 7.53.

**( $R_p, R_p$ )-1,2-Bis[[2-(9-anthrylmethoxy)phenyl](phenyl)phosphino-*P*-borane]ethane (**1l**).**

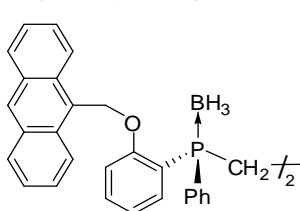

Prepared according to the general procedure (A) from ( $R_p, R_p$ )-**1a** using 9-chloromethylantracene (0.68 g, 3.0 mmol), KI (10 mg) and stirred at r.t. The crude was purified by recrystallization from MeOH (20 mL). Yellow crystals (779 mg, 93%): mp 196–198 °C (dec.);  $R_f$ : 0.51 (toluene);  $[\alpha]_D^{25}$ : +281 (c 1.0 in  $CHCl_3$ );  $^1H$  NMR:  $\delta$  = 0.15–1.50 (br m, 6H; 2  $BH_3$ ), 2.17 (m, 4H; 2  $PCH_2$ ), 5.63 (s, 4H; 2  $OCH_2$ ), 6.23 (t,  $J$  = 7.8 Hz, 4H; Ar-H), 6.53 (t,  $J$  = 7.5 Hz, 2H; Ar-H), 6.76 (m, 4H; Ar-H), 7.12 (m, 4H; Ar-H), 7.29–7.48 (m, 8H; Ar-H), 7.55 (m, 2H; Ar-H), 7.76–7.92 (m, 6H; Ar-H), 7.97 (dd,  $J$  = 0.9 and 5.4 Hz, 4H; Ar-H), 8.44 (s, 2H; Ar-H);  $^{13}C$  NMR:  $\delta$  = 16.5 (m), 62.9, 111.3, 116.3 (d,  $J(C,P)$  = 52 Hz), 120.9 (m), 123.6, 125.0, 125.4, 126.8, 127.1 (m), 127.9 (d,  $J(C,P)$  = 60 Hz), 128.8, 129.0, 129.3, 130.6 (m), 130.8, 131.2, 133.8, 136.4 (m), 160.8;  $^{31}P$  NMR:  $\delta$  = +17.5 (br s); anal. calcd. for  $C_{56}H_{50}B_2O_2P_2$  (838.56): C 80.21, H 6.01; found: C 80.43, H 6.15.

**(*R<sub>p</sub>,R<sub>p</sub>*)-1,2-Bis[[2-(2-methoxyethoxy)phenyl](phenyl)phosphino-*P*-borane]ethane (1p).**

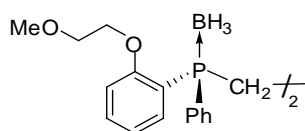

Prepared according to the general procedure (A) from (*R<sub>p</sub>,R<sub>p</sub>*)-**1a** using 2-methoxyethyl *p*-toluenesulfonate (0.92 g, 4.0 mmol). White powder (535 mg, 93%): mp 168–170 °C; *R<sub>f</sub>*: 0.50 (toluene/EtOAc 8:2); [ $\alpha$ ]<sub>D</sub><sup>25</sup>: +48.0 (c 1.0 in CHCl<sub>3</sub>); <sup>1</sup>H NMR:  $\delta$  = 0.25–1.80 (m, 6H; 2 BH<sub>3</sub>), 2.67 (m, 4H; 2 PCH<sub>2</sub>), 3.28 (s, 6H; 2 Me), 3.48 (m, 4H; 2 CH<sub>2</sub>OMe), 3.85 (m, 4H; 2 CH<sub>2</sub>CH<sub>2</sub>OMe), 6.80 (br d, *J* = 8.3 Hz, 2H; Ar-H), 7.04 (m, 2H; Ar-H), 7.41 (m, 8H; Ar-H), 7.72 (m, 4H; Ar-H), 7.95 (m, 2H; Ar-H); <sup>13</sup>C NMR:  $\delta$  = 17.8 (m), 58.9, 67.2, 70.1, 111.2, 115.3 (d, *J*(C,P) = 52 Hz), 121.0 (m), 128.3 (m), 129.3 (d, *J*(C,P) = 59 Hz), 130.6, 132.0 (m), 133.8, 136.8 (m), 160.5; <sup>31</sup>P NMR:  $\delta$  = +18.7 (br s); MS (FAB): *m/z* (%): 573 (22) [*M*<sup>+</sup>-H]; anal. calcd. for C<sub>32</sub>H<sub>42</sub>B<sub>2</sub>O<sub>4</sub>P<sub>2</sub> (574.24): C 66.93, H 7.37; found: C 67.12, H 7.53.

**(*R<sub>p</sub>,R<sub>p</sub>*)-1,2-Bis[[2-(*tert*-butoxycarbonylmethoxy)phenyl](phenyl)phosphino-*P*-borane]ethane (1q).**

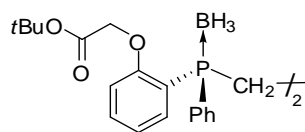

Prepared according to the general procedure (A) from (*R<sub>p</sub>,R<sub>p</sub>*)-**1a** using *tert*-butyl bromoacetate (0.78 g, 0.59 mL, 4.0 mmol). Colorless crystals (645 mg, 94%): mp 147–149 °C; *R<sub>f</sub>*: 0.56 (toluene/EtOAc 8:2); [ $\alpha$ ]<sub>D</sub><sup>25</sup>: +10.6 (c 1.0 in CHCl<sub>3</sub>); <sup>1</sup>H NMR:  $\delta$  = 0.25–1.75 (m, 6H; 2 BH<sub>3</sub>), 1.35 (s, 18H; 6 Me), 2.71 (m, 4H; 2 PCH<sub>2</sub>), 4.31 (s, 4H; 2 OCH<sub>2</sub>), 6.65 (m, 2H; Ar-H), 7.04 (m, 2H; Ar-H), 7.39 (m, 8H; Ar-H), 7.75 (m, 4H; Ar-H), 7.92 (m, 2H; Ar-H); <sup>13</sup>C NMR:  $\delta$  = 18.2 (m), 27.9, 65.3, 82.5, 111.2 (m), 115.6 (d, *J*(C,P) = 52 Hz), 121.7 (m), 128.3 (m), 129.0 (d, *J*(C,P) = 59 Hz), 130.6, 132.2 (m), 133.5, 137.0 (m), 159.6 (m), 166.6; <sup>31</sup>P NMR:  $\delta$  = +19.7 (br s); MS (FAB): *m/z* (%): 685 (5) [*M*<sup>+</sup>-H]; anal. calcd. for C<sub>38</sub>H<sub>50</sub>B<sub>2</sub>O<sub>6</sub>P<sub>2</sub> (686.37): C 66.50, H 7.34; found: C 66.55, H 7.49.

**(*R<sub>p</sub>,R<sub>p</sub>*)-1,2-Bis[[2-(*N*-*tert*-butylcarbamoylmethoxy)phenyl](phenyl)phosphino-*P*-borane]ethane (1r).**

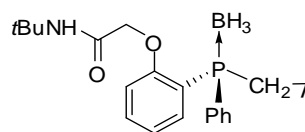

Prepared according to the general procedure (B) from (*R<sub>p</sub>,R<sub>p</sub>*)-**1a** using bromo-(*N*-*tert*-butyl)acetamide (0.78 g, 4.0 mmol). White powder (625 mg, 91%): mp 171–173 °C; *R<sub>f</sub>*: 0.16 (toluene/EtOAc 6:4); [ $\alpha$ ]<sub>D</sub><sup>25</sup>: +20.10 (c 1.0 in CHCl<sub>3</sub>); <sup>1</sup>H NMR:  $\delta$  = 0.35–1.60 (m, 6H; 2 BH<sub>3</sub>), 1.19 (s, 18H; 6 Me), 2.35 and 2.58 (2 m, 4H; 2 PCH<sub>2</sub>), 3.96 and 4.18 (2 d, *J* = 14.5 Hz, 2x 2H; 2 OCH<sub>2</sub>), 5.90 (br s, 2H; NH), 6.83 (m, 2H; Ar-H), 7.14 (m, 2H; Ar-H), 7.37–7.69 (m, 14H; Ar-H); <sup>13</sup>C NMR:  $\delta$  = 18.6 (m), 28.5, 51.4, 67.6, 112.1 (m), 115.0 (d, *J*(C,P) = 54 Hz), 122.5 (m), 128.2 (d, *J*(C,P) = 57 Hz), 128.9 (m), 131.4, 131.6 (m), 134.3, 135.3 (m), 158.7, 165.7; <sup>31</sup>P NMR:  $\delta$  = +18.8 (br s); MS (FAB): *m/z* (%): 683 (30) [*M*<sup>+</sup>-H]; anal. calcd. for C<sub>38</sub>H<sub>52</sub>B<sub>2</sub>N<sub>2</sub>O<sub>4</sub>P<sub>2</sub> (684.40): C 66.69, H 7.66, N 4.09; found: C 66.86, H 7.82, N 4.26.

**(*R<sub>p</sub>,R<sub>p</sub>*)-1,2-Bis[[2-phenacyloxyphenyl](phenyl)phosphino-*P*-borane]ethane (1s).**

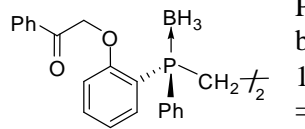

Prepared according to the general procedure (A) from (*R<sub>p</sub>,R<sub>p</sub>*)-**1a** using 2-bromoacetophenone (0.44 g, 2.2 mmol). White powder (655 mg, 94%): mp 184–186 °C; *R<sub>f</sub>*: 0.45 (toluene/EtOAc 9:1); [ $\alpha$ ]<sub>D</sub><sup>25</sup>: +14.0 (c 1.0 in CHCl<sub>3</sub>); <sup>1</sup>H NMR:  $\delta$  = 0.35–1.65 (br m, 6H; 2 BH<sub>3</sub>), 2.56–3.02 (m, 4H; 2 PCH<sub>2</sub>), 5.09 and 5.19 (2d, *J* = 16.7 Hz, 4H; 2 OCH<sub>2</sub>), 6.66 (m, 2H; Ar-H), 6.99 (m, 2H; Ar-H), 7.26–7.50 (m, 12H; Ar-H), 7.59 (m, 2H; Ar-H), 7.70–7.95 (m, 10H; Ar-H); <sup>13</sup>C NMR:  $\delta$  = 18.2 (m), 70.5, 112.0 (m), 115.9 (d, *J*(C,P) = 52 Hz), 121.7 (m), 127.7, 128.4 (m), 128.8, 129.1 (d, *J*(C,P) = 59 Hz), 130.6, 132.0 (m), 133.6, 133.9, 134.0, 136.8 (m), 159.9 (m), 192.4; <sup>31</sup>P NMR:  $\delta$  = +19.8 (br s); MS (FAB): *m/z* (%): 693 (7) [*M*<sup>+</sup>-H]; anal. calcd. for C<sub>42</sub>H<sub>42</sub>B<sub>2</sub>O<sub>2</sub>P<sub>2</sub> (694.35): C 72.65, H 6.10; found: C 72.65, H 6.14.

**(*R<sub>p</sub>,R<sub>p</sub>*)-1,2-Bis[(phenyl)(2-triisopropylsiloxyphenyl)phosphino-*P*-borane]ethane (1t).**

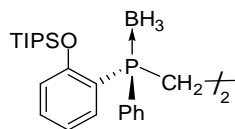

Prepared according to the general procedure (A) from (*R<sub>p</sub>,R<sub>p</sub>*)-**1a** using chlorotriisopropylsilane (0.58 g, 0.64 mL, 3.0 mmol). Colorless crystals (725 mg, 94%): mp 164–166 °C; *R<sub>f</sub>*: 0.60 (toluene); [ $\alpha$ ]<sub>D</sub><sup>25</sup> = +65.2 (c 1.0 in CHCl<sub>3</sub>); <sup>1</sup>H NMR:  $\delta$  = 0.20–1.70 (m, 6H; 2 BH<sub>3</sub>), 0.78 and 0.81 (2d, *J* = 7.5 Hz, 36H; 12 Me), 1.09 (sept, *J* = 7.5 Hz, 6H; 6 CH), 2.44–2.79 (m, 4H; 2 CH<sub>2</sub>), 6.78 (m, 2H; Ar-H), 7.04 (m, 2H; Ar-H), 7.28–7.49 (m, 12H; Ar-H), 7.86 (m, 2H; Ar-H); <sup>13</sup>C NMR:  $\delta$  = 13.1, 17.8, 17.9, 19.4 (m), 115.5 (d, *J*(C,P) = 55 Hz), 117.9, 120.8 (m), 128.6 (m), 130.4, 130.7 (d, *J*(C,P) = 60 Hz), 130.9 (m),

133.6, 137.1 (m), 158.4;  $^{31}\text{P}$  NMR:  $\delta = +20.0$  (br m); MS (FAB):  $m/z$  (%): 769 (25) [ $M^+ - \text{H}$ ]; anal. calcd. for  $\text{C}_{44}\text{H}_{70}\text{B}_2\text{O}_2\text{P}_2\text{Si}_2$  (770.77): C 68.56, H 9.15; found: C 68.53, H 9.43.

**( $R_P, R_P$ )-1,2-Bis[(2-acetoxyphenyl)(phenyl)phosphino-*P*-borane]ethane (1u).**

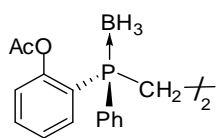

Prepared according to the general procedure (C) from ( $R_P, R_P$ )-**1a** using acetyl chloride (0.17 g, 0.16 mL, 2.2 mmol). Colorless crystals (530 mg, 97%): mp 143–144 °C;  $R_f$ : 0.43 (toluene/EtOAc 9:1);  $[\alpha]_D^{25}$ : +70.5 (c 1.0 in  $\text{CHCl}_3$ );  $^1\text{H}$  NMR:  $\delta = 0.25$ –1.70 (br m, 6H; 2  $\text{BH}_3$ ), 1.84 (s, 6H; 2 Me), 2.52 (m, 4H; 2  $\text{CH}_2$ ), 7.18 (m, 2H; Ar-H), 7.30–7.60 (m, 14H; Ar-H), 7.79 (m, 2H; Ar-H);  $^{13}\text{C}$  NMR:  $\delta = 18.4$  (m), 20.7, 119.7 (d,  $J(\text{C}, \text{P}) = 52$  Hz), 123.7 (m), 126.1 (m), 128.3 (d,  $J(\text{C}, \text{P}) = 59$  Hz), 129.0 (m), 131.4 (m), 133.3, 135.1 (m), 152.6, 167.6;  $^{31}\text{P}$  NMR:  $\delta = +19.3$  (br m); anal. calcd. for  $\text{C}_{30}\text{H}_{34}\text{B}_2\text{O}_4\text{P}_2$  (542.16): C 66.46, H 6.32; found: C 66.51, H 6.35.

**( $R_P, R_P$ )-1,2-Bis[(phenyl)(2-pivaloyloxyphenyl)phosphino-*P*-borane]ethane (1v).**

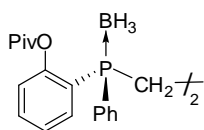

Prepared according to the general procedure (C) from ( $R_P, R_P$ )-**1a** using pivaloyl chloride (0.26 g, 0.27 mL, 2.2 mmol). Colorless crystals (610 mg, 97%): mp 177–179 °C;  $R_f$ : 0.64 (toluene/EtOAc 9:1);  $[\alpha]_D^{25}$ : +50.3 (c 1.0 in  $\text{CHCl}_3$ );  $^1\text{H}$  NMR:  $\delta = 0.25$ –1.80 (br m, 6H; 2  $\text{BH}_3$ ), 0.85 (s, 18H; 6 Me), 2.49 (m, 4H; 2  $\text{CH}_2$ ), 7.02 (m, 2H; Ar-H), 7.26–7.49 (m, 12H; Ar-H), 7.57 (m, 2H; Ar-H), 7.85 (m, 2H; Ar-H);  $^{13}\text{C}$  NMR:  $\delta = 18.9$  (m), 26.6, 38.8, 118.6 (d,  $J(\text{C}, \text{P}) = 52$  Hz), 123.6 (m), 125.8 (m), 128.4 (d,  $J(\text{C}, \text{P}) = 57$  Hz), 128.9 (m), 131.0 (m), 131.1 (d,  $J(\text{C}, \text{P}) = 5$  Hz), 133.4, 136.1 (m), 153.5, 175.6;  $^{31}\text{P}$  NMR:  $\delta = +21.3$  (br m); MS (FAB):  $m/z$  (%): 625 (12) [ $M^+ - \text{H}$ ]; anal. calcd. for  $\text{C}_{36}\text{H}_{46}\text{B}_2\text{O}_4\text{P}_2$  (626.32): C 69.04, H 7.40; found: C 69.33, H 7.56.

**( $R_P, R_P$ )-1,2-Bis[(2-benzoyloxyphenyl)(phenyl)phosphino-*P*-borane]ethane (1w).**

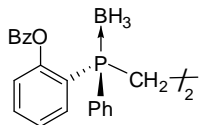

Prepared according to the general procedure (C) from ( $R_P, R_P$ )-**1a** using benzoyl chloride (0.31 g, 0.26 mL, 2.2 mmol). Colorless crystals (650 mg, 98%): mp 167–169 °C;  $R_f$ : 0.62 (toluene/EtOAc 9:1);  $[\alpha]_D^{25}$ : +97.1 (c 1.0 in  $\text{CHCl}_3$ );  $^1\text{H}$  NMR:  $\delta = 0.35$ –1.65 (br m, 6H; 2  $\text{BH}_3$ ), 2.55 (m, 4H; 2  $\text{PCH}_2$ ), 7.05–7.45 (m, 18H; Ar-H), 7.58 (m, 4H; Ar-H), 7.72 (m, 4H; Ar-H), 7.92 (m, 2H; Ar-H);  $^{13}\text{C}$  NMR:  $\delta = 18.0$  (m), 120.4 (d,  $J(\text{C}, \text{P}) = 52$  Hz), 124.1, 126.1 (m), 127.5 (d,  $J(\text{C}, \text{P}) = 58$  Hz), 128.0, 128.3, 128.5 (m), 130.1, 130.9, 131.3 (m), 133.4, 133.7, 135.1 (m), 152.7, 163.5;  $^{31}\text{P}$  NMR:  $\delta = +18.8$  (br s); MS (FAB):  $m/z$  (%): 665 (16) [ $M^+ - \text{H}$ ]; anal. calcd. for  $\text{C}_{40}\text{H}_{38}\text{B}_2\text{O}_4\text{P}_2$  (666.30): C 72.10, H 5.75; found: C 72.33, H 5.80.

**( $R_P, R_P$ )-1,2-Bis[(phenyl)[2-(*p*-tosyloxy)phenyl]phosphino-*P*-borane]ethane (1x).**

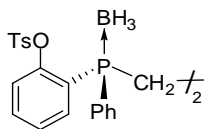

Prepared according to the general procedure (C) from ( $R_P, R_P$ )-**1a** using *p*-toluenesulfonyl chloride (0.42 g, 2.2 mmol). Colorless crystals (710 mg, 93%): mp 169–171 °C;  $R_f$ : 0.22 (toluene);  $[\alpha]_D^{25}$ : +80.2 (c 1.0 in  $\text{CHCl}_3$ );  $^1\text{H}$  NMR:  $\delta = 0.20$ –1.51 (br m, 6H; 2  $\text{BH}_3$ ), 2.32–2.56 (m, 10H; 2  $\text{PCH}_2$  and 2 Me), 7.10–7.59 (m, 24H; Ar-H), 7.97 (m, 2H; Ar-H);  $^{13}\text{C}$  NMR:  $\delta = 17.7$  (m), 21.7, 118.5 (d,  $J(\text{C}, \text{P}) = 49$  Hz), 119.0, 125.9 (m), 128.1, 128.2 (d,  $J(\text{C}, \text{P}) = 59$  Hz), 128.8, 129.8, 130.9, 131.4, 132.4, 134.0, 136.8 (m), 145.6, 152.3;  $^{31}\text{P}$  NMR:  $\delta = +19.9$  (br s); anal. calcd. for  $\text{C}_{40}\text{H}_{42}\text{B}_2\text{O}_6\text{P}_2\text{S}_2$  (766.46): C 62.68, H 5.52; found: C 62.52, H 5.53.

**( $R_P, R_P$ )-1,2-Bis[(2-(diphenylphosphinyloxy)phenyl)(phenyl)phosphino-*P*-borane]ethane (1y).**

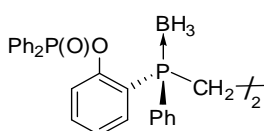

Prepared according to the general procedure (C) from ( $R_P, R_P$ )-**1a** using diphenylphosphinic chloride (0.52 g, 0.42 mL, 2.2 mmol). White powder (810 mg, 94%): mp 116–118 °C;  $R_f$ : 0.51 (EtOAc);  $[\alpha]_D^{25}$ : +126.9 (c 1.0 in  $\text{CHCl}_3$ );  $^1\text{H}$  NMR:  $\delta = 0.55$ –1.55 (br m, 6H; 2  $\text{BH}_3$ ), 2.47 (m, 4H; 2  $\text{PCH}_2$ ), 7.08–7.58 (m, 36H; Ar-H), 7.86 (m, 2H; Ar-H);  $^{13}\text{C}$  NMR:  $\delta = 17.8$  (m), 117.5 (m), 119.5 (m), 124.1 (m), 127.5–135.8 (m), 153.9 (m);  $^{31}\text{P}$  NMR:  $\delta = +18.2$  (br m, 2P;  $\text{PBH}_3$ ), +33.7 (s, 2P; PO); MS (FAB):  $m/z$  (%): 859 (16) [ $M^+ + \text{H}$ ]; anal. calcd. for  $\text{C}_{50}\text{H}_{48}\text{B}_2\text{O}_4\text{P}_4$  (858.43): C 69.96, H 5.64; found: C 70.27, H 5.68.

**(*R<sub>p</sub>,R<sub>p</sub>*)-1,2-Bis[(2-(diphenylphosphoryloxy)phenyl)(phenyl)phosphino-*P*-borane]ethane (**1z**).**

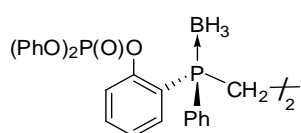

Prepared according to the general procedure (C) from (*R<sub>p</sub>,R<sub>p</sub>*)-**1a** using diphenyl phosphoryl chloride (0.59 g, 0.45 mL, 2.2 mmol). Colorless foam (790 mg, 86%): *R<sub>f</sub>*: 0.33 (toluene/EtOAc 9:1);  $[\alpha]_D^{25}$ : +41.6 (c 1.0 in CHCl<sub>3</sub>); <sup>1</sup>H NMR:  $\delta$  = 0.25–1.75 (m, 6H; 2 BH<sub>3</sub>), 2.74 (m, 4H; 2 CH<sub>2</sub>), 6.97 (m, 8H; Ar-H), 7.09–7.39 (m, 20H; Ar-H), 7.44 (m, 2H; Ar-H), 7.62 (m, 6H; Ar-H), 7.93 (m, 2H; Ar-H); <sup>13</sup>C NMR:  $\delta$  = 18.3 (m), 118.6 (dd, *J*(C,P) = 50 and 11 Hz), 118.8 (m), 119.9 (m), 125.2 (m), 125.5 (m), 127.9 (d, *J*(C,P) = 58 Hz), 128.6 (m), 129.6 (m), 131.0 (m), 131.5 (m), 133.9 (m), 136.0 (m), 149.7 (m), 152.5 (d, *J*(C,P) = 5 Hz); <sup>31</sup>P NMR:  $\delta$  = -17.9 (s, 2P; PO), +19.3 (br m, PBH<sub>3</sub>); MS (FAB): *m/z* (%): 921 (2) [*M*<sup>+</sup>-H]; anal. calcd. for C<sub>50</sub>H<sub>48</sub>B<sub>2</sub>O<sub>8</sub>P<sub>4</sub> (922.43): C 65.10, H 5.24; found: C 65.00, H 5.34.

**General Procedure for the Synthesis of 1,2-Bis[(*o*-RO-phenyl)(phenyl)phosphino]ethane "R-SMS-Phos" (**2b,c,l,p-r,t-y**) - Scheme 1, step b:** 1,2-Bis[(*o*-RO-phenyl)(phenyl)phosphino-*P*-borane]ethane in Et<sub>2</sub>NH (10 mL/1 mmol of **1**) was refluxed for 2–3 h under inert atmosphere. After concentration, purification on silica gel and/or recrystallization under inert atmosphere the title compound **2** was obtained.

**"R-SMS-Phos" (**2t,u**) - Scheme 1, step d:** To a stirred solution of **2a** (1 mmol) in THF (10 mL) was added NaH (60 mg, 2.5 mmol) at 0 °C. After 15 min, TIPSCl or AcCl (2.5 mmol) was added and left to stir at r.t. for 1 h under inert atmosphere. The mixture was quenched with H<sub>2</sub>O (0.1 mL), concentrated, and the residue was filtered through a pad of silica gel and the product was recrystallized under inert atmosphere.

**(*R<sub>p</sub>,R<sub>p</sub>*)-1,2-Bis[(*o*-hydroxyphenyl)(phenyl)phosphino]ethane (**2a**) ((*R<sub>p</sub>,R<sub>p</sub>*)-SMS-Phos).**

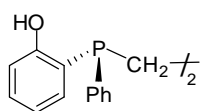

For its preparation from (*R<sub>p</sub>,R<sub>p</sub>*)-DiPAMP (**2b**) (Scheme 1, step e), see above. It was also prepared from (*R<sub>p</sub>,R<sub>p</sub>*)-**1a** (0.46 g, 1.00 mmol) according to the general procedure (Scheme 1, step b). The product was isolated as a diethylamine complex. The free ligand was obtained upon stirring with Amberlite<sup>®</sup> IRC-50 (1.2 g) in MeOH (5 mL) for 3 h. Purification on silica gel eluting with toluene/EtOAc 8:2 yielded (*R<sub>p</sub>,R<sub>p</sub>*)-**2a** as white powder (375 mg, 87%). Its characteristics were identical to the product obtained by demethylation of (*R<sub>p</sub>,R<sub>p</sub>*)-DiPAMP.

**(*R<sub>p</sub>,R<sub>p</sub>*)-1,2-Bis[(*o*-anisyl)(phenyl)phosphino]ethane (**2b**) ((*R<sub>p</sub>,R<sub>p</sub>*)-DiPAMP).**

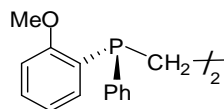

Prepared from (*R<sub>p</sub>,R<sub>p</sub>*)-**1b** (0.37 g, 0.75 mmol) according to the general procedure. Colorless crystals (335 mg, 97%). <sup>1</sup>H NMR:  $\delta$  = 1.95 and 2.29 (2 m, 4H; 2 PCH<sub>2</sub>), 3.74 (s, 6H; 2 Me), 6.77–6.97 (m, 6H; Ar-H), 7.21–7.41 (m, 12H; Ar-H).

**(*R<sub>p</sub>,R<sub>p</sub>*)-1,2-Bis[(2-ethoxyphenyl)(phenyl)phosphino]ethane (**2c**).**

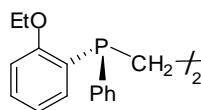

Prepared from (*R<sub>p</sub>,R<sub>p</sub>*)-**1c** (0.39 g, 0.75 mmol) according to the general procedure. Colorless crystals (355 mg, 98%): mp 82–84 °C; *R<sub>f</sub>*: 0.42 (hexane/EtOAc 8:2);  $[\alpha]_D^{25}$ : -67.0 (c 1.0 in CHCl<sub>3</sub>); <sup>1</sup>H NMR:  $\delta$  = 1.19 (t, *J* = 7.0 Hz, 6H; 2 Me), 1.97 and 2.32 (2 m, 4H; 2 PCH<sub>2</sub>), 3.91 (m, 4H; 2 OCH<sub>2</sub>), 6.77 (m, 2H; Ar-H), 6.84 (m, 2H; Ar-H), 7.01 (m, 2H; Ar-H), 7.20–7.41 (m, 12H; Ar-H); <sup>13</sup>C NMR:  $\delta$  = 14.4, 21.8 (m), 63.6, 110.9, 120.5, 126.5 (m), 128.2 (m), 128.6, 129.8, 132.2 (m), 133.3 (m), 137.0 (m), 160.2 (m); <sup>31</sup>P NMR:  $\delta$  = -19.6 (s); MS (FAB): *m/z* (%): 487 (100) [*M*<sup>+</sup>+H]; HR-MS (EI): *m/z* = 486.189, calcd. for C<sub>30</sub>H<sub>32</sub>O<sub>2</sub>P<sub>2</sub> [*M*<sup>+</sup>]: 486.188; anal. calcd. for C<sub>30</sub>H<sub>32</sub>O<sub>2</sub>P<sub>2</sub> (486.52): C 74.06, H 6.63; found: C 74.39, H 6.73.

**(*R<sub>p</sub>,R<sub>p</sub>*)-1,2-Bis[[2-(9-anthrylmethoxy)phenyl](phenyl)phosphino]ethane (**2l**).**

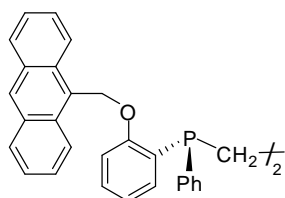

Prepared from (*R<sub>p</sub>,R<sub>p</sub>*)-**1l** (0.626 g, 0.75 mmol) according to the general procedure. Yellow crystals (575 mg, 95%): mp 183–185 °C; *R<sub>f</sub>*: 0.71 (toluene);  $[\alpha]_D^{25}$ : -31.0 (c 0.5 in CHCl<sub>3</sub>); <sup>1</sup>H NMR:  $\delta$  = 1.60 and 1.93 (2 m, 4H; 2 PCH<sub>2</sub>), 5.67 and 5.82 (2 d, *J* = 10.8 Hz, 4H; 2 CH<sub>2</sub>), 6.65–6.93 (m, 12H; Ar-H), 7.02 (m, 2H; Ar-H), 7.11 (m, 2H; Ar-H), 7.26–7.41 (m, 10H; Ar-H), 7.97 (m, 8H;

Ar-H), 8.42 (s, 2H; Ar-H);  $^{13}\text{C}$  NMR:  $\delta = 21.4$  (m), 63.0, 111.5, 121.1, 124.1, 124.9, 126.4, 126.8, 127.6 (m), 127.8, 128.7, 128.8, 130.0, 130.9, 131.3, 132.5, 132.6, 132.7, 132.8, 137.2 (m), 160.7 (m);  $^{31}\text{P}$  NMR:  $\delta = -21.8$  (s); anal. calcd. for  $\text{C}_{56}\text{H}_{44}\text{O}_2\text{P}_2$  (810.89) C 82.95, H 5.47; found: C 82.91, H 5.52.

**( $R_P, R_P$ )-1,2-Bis{[2-(2-methoxyethoxy)phenyl](phenyl)phosphino}ethane (2p).**

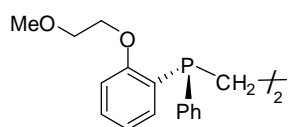

Prepared from ( $R_P, R_P$ )-**1p** (431 mg, 0.75 mmol) according to the general procedure. Colorless oil (400 mg, 98%):  $R_f$ : 0.33 (toluene);  $[\alpha]_D^{25}$ :  $-9.4$  (c 0.6 in  $\text{CHCl}_3$ );  $^1\text{H}$  NMR:  $\delta = 1.96$  and  $2.33$  (m, 4H; 2  $\text{PCH}_2$ ), 3.31 (s, 6H; 2 Me), 3.50 (t,  $J = 5.2$  Hz, 4H; 2  $\text{CH}_2\text{OMe}$ ), 3.99 (m, 4H; 2  $\text{CH}_2\text{CH}_2\text{OMe}$ ), 6.81 (d,  $J = 8.1$  Hz, 2H; Ar-H), 6.87 (m, 2H; Ar-H), 7.04 (m, 2H; Ar-H), 7.22–7.40 (m, 12H; Ar-H);  $^{13}\text{C}$  NMR:  $\delta = 22.0$  (m), 59.1, 67.5, 70.5, 111.3, 120.9, 127.1 (m), 128.2 (m), 128.4, 129.7, 132.2 (m), 133.1 (m), 137.4 (m), 160.1 (m);  $^{31}\text{P}$  NMR:  $\delta = -20.2$  (s); MS (FAB):  $m/z$  (%): 547 (91) [ $M^+ + \text{H}$ ]; HR-MS (EI):  $m/z = 546.210$ , calcd. for  $\text{C}_{32}\text{H}_{36}\text{O}_4\text{P}_2$  [ $M^+$ ]: 546.209.

**( $R_P, R_P$ )-1,2-Bis{[2-(*tert*-butoxycarbonylmethoxy)phenyl](phenyl)phosphino}ethane (2q).**

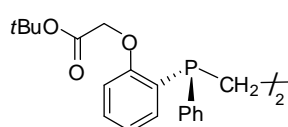

Prepared from ( $R_P, R_P$ )-**1q** (0.515 g, 0.75 mmol) according to the general procedure. Colorless oil (485 mg, 98%):  $R_f$ : 0.66 (toluene);  $[\alpha]_D^{25}$ :  $-47.7$  (c 1.0 in  $\text{CHCl}_3$ );  $^1\text{H}$  NMR:  $\delta = 1.42$  (s, 18H; 6 Me), 2.00 and 2.39 (2m, 4H; 2  $\text{PCH}_2$ ), 4.42 (s, 4H; 2  $\text{OCH}_2$ ), 6.65 (m, 2H; Ar-H), 6.86 (m, 2H; Ar-H), 6.97 (m, 2H; Ar-H), 7.16–7.43 (m, 12H; Ar-H);  $^{13}\text{C}$  NMR:  $\delta = 22.0$  (m), 28.0, 66.0, 82.1, 111.0, 121.5, 127.5 (m), 128.2 (m), 128.9, 129.5, 132.3, 133.5 (m), 136.9 (m), 159.5 (m), 167.6;  $^{31}\text{P}$  NMR:  $\delta = -21.0$  (s); MS (EI):  $m/z$  (%): 658 (91) [ $M^+$ ]; HR-MS (EI):  $m/z = 658.264$ , calcd. for  $\text{C}_{38}\text{H}_{44}\text{O}_6\text{P}_2$  [ $M^+$ ]: 658.261; anal. calcd. for  $\text{C}_{38}\text{H}_{44}\text{O}_6\text{P}_2$  (658.70): C 69.29, H 6.73; found: C 69.52, H 7.03.

**( $R_P, R_P$ )-1,2-Bis{[2-(*N*-*tert*-butylcarbamoylmethoxy)phenyl](phenyl)phosphino}ethane (2r).**

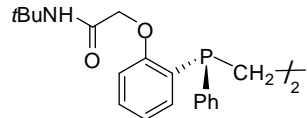

Prepared from ( $R_P, R_P$ )-**1r** (0.513 g, 0.75 mmol) according to the general procedure. Colorless crystals (470 mg, 95%): mp 149–150 °C;  $R_f$ : 0.50 (toluene/EtOAc 8:2);  $[\alpha]_D^{25}$ :  $+21.2$  (c 1.0 in  $\text{CHCl}_3$ );  $^1\text{H}$  NMR:  $\delta = 1.33$  (s, 18H; 6 Me), 2.02 and 2.19 (2m, 4H; 2  $\text{PCH}_2$ ), 4.27 and 4.35 (2d,  $J = 14.4$  Hz, 4H; 2  $\text{OCH}_2$ ), 6.70 (br s, 2H; NH), 6.80 (m, 2H; Ar-H), 6.98 (m, 2H; Ar-H), 7.09 (m, 2H; Ar-H), 7.31 (m, 12H; Ar-H);  $^{13}\text{C}$  NMR:  $\delta = 22.6$  (m), 28.7, 51.2, 67.9, 111.8, 122.2, 125.8 (m), 128.5 (m), 128.9, 130.5, 131.8 (m), 132.5 (m), 136.6 (m), 158.9 (m), 166.7;  $^{31}\text{P}$  NMR:  $\delta = -24.4$  (s); MS (FAB):  $m/z$  (%): 657 (100) [ $M^+ + \text{H}$ ]; HR-MS (EI):  $m/z = 656.296$ , calcd. for  $\text{C}_{38}\text{H}_{46}\text{N}_2\text{O}_4\text{P}_2$  [ $M^+$ ]: 656.293; anal. calcd. for  $\text{C}_{38}\text{H}_{46}\text{N}_2\text{O}_4\text{P}_2$  (656.73): C 69.50, H 7.06, N 4.27; found: C 69.47, H 7.37, N 4.12.

**( $R_P, R_P$ )-1,2-Bis{(phenyl)(2-triisopropylsiloxyphenyl)phosphino}ethane (2t).**

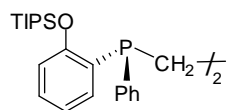

Prepared from ( $R_P, R_P$ )-**1t** (578 mg, 0.75 mmol) according to the general procedure. Colorless crystals (545 mg, 98%): mp 86–88 °C;  $R_f$ : 0.90 (hexane/toluene 1:1);  $[\alpha]_D^{25}$ :  $+5.7$  (c 1.0 in  $\text{CHCl}_3$ );  $^1\text{H}$  NMR:  $\delta = 1.01$  and  $1.02$  (2d,  $J = 7.5$  Hz, 36H; 12 Me), 1.22 (sept,  $J = 7.5$  Hz, 6H; 6 CH), 1.86 and 2.12 (2 m, 4H; 2  $\text{CH}_2$ ), 6.75 (m, 2H; Ar-H), 6.82 (m, 2H; Ar-H), 6.95 (m, 2H; Ar-H), 7.15 (m, 2H; Ar-H), 7.23 (m, 10H; Ar-H);  $^{13}\text{C}$  NMR:  $\delta = 13.1$ , 18.0, 22.9, 117.5, 120.8, 128.1 (m), 128.2, 128.6 (m), 129.4, 131.9, 133.0 (m), 138.1 (m), 158.1 (m);  $^{31}\text{P}$  NMR:  $\delta = -23.9$  (s); MS (FAB):  $m/z$  (%): 743 (96) [ $M^+ + \text{H}$ ]; HR-MS (EI):  $m/z = 742.395$ , calcd. for  $\text{C}_{44}\text{H}_{64}\text{O}_2\text{P}_2\text{Si}_2$  [ $M^+$ ]: 742.392; anal. calcd. for  $\text{C}_{44}\text{H}_{64}\text{O}_2\text{P}_2\text{Si}_2$  (743.10): C 71.12, H 8.68; found: C 71.23, H 8.88.

**( $R_P, R_P$ )-1,2-Bis{(2-acetoxyphenyl)(phenyl)phosphino}ethane (2u).**

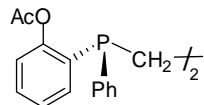

Prepared from ( $R_P, R_P$ )-**1u** (406 mg, 0.75 mmol) according to the general procedure. Colorless oil (370 mg, 96%):  $R_f$ : 0.54 (toluene/EtOAc 9:1);  $[\alpha]_D^{25}$ :  $-6.0$  (c 0.5 in  $\text{CHCl}_3$ );  $^1\text{H}$  NMR:  $\delta = 1.91$ – $2.20$  (m, 10H; 2  $\text{CH}_2$ ; 2 Ac), 7.05 (m, 2H; Ar-H), 7.14–7.22 (m, 4H; Ar-H), 7.25–7.40 (m, 12H; Ar-H);  $^{13}\text{C}$  NMR:  $\delta = 20.7$ , 22.5 (m), 122.7, 126.2, 128.5 (m), 128.9, 130.0, 130.8 (m), 132.4 (m), 132.7 (m), 136.9 (m), 153.2 (m), 169.0;  $^{31}\text{P}$  NMR:  $\delta = -31.2$  (s); HR-MS (EI):  $m/z = 514.147$ , calcd. for  $\text{C}_{30}\text{H}_{28}\text{O}_4\text{P}_2$  [ $M^+$ ]: 514.146.

**(*R<sub>P</sub>,R<sub>P</sub>*)-1,2-Bis[(phenyl)(2-pivaloyloxyphenyl)phosphino]ethane (2v).**

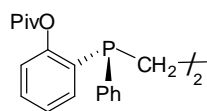

Prepared from (*R<sub>P</sub>,R<sub>P</sub>*)-**1v** (470 mg, 0.75 mmol) according to the general procedure. White solid (430 mg, 96%): *R<sub>f</sub>*: 0.18 (toluene);  $[\alpha]_D^{25}$ : +5.9 (c 1.0 in CHCl<sub>3</sub>); <sup>1</sup>H NMR:  $\delta$  = 1.25 (s, 18H; 6 Me), 2.02 (m, 4H; 2 CH<sub>2</sub>), 7.01 (m, 2H; Ar-H), 7.13 (m, 4H; Ar-H), 7.20–7.38 (m, 12H; Ar-H); <sup>13</sup>C NMR:  $\delta$  = 22.9 (m), 27.1, 39.1, 122.4, 126.0, 128.4 (m), 128.6, 129.9, 130.6 (m), 132.3, 132.7 (m), 137.0 (m), 153.8 (m), 176.6; <sup>31</sup>P NMR:  $\delta$  = -25.3 (s); HR-MS (EI): *m/z* = 598.242, calcd. for C<sub>36</sub>H<sub>40</sub>O<sub>4</sub>P<sub>2</sub> [*M*<sup>+</sup>]: 598.240; anal. calcd. for C<sub>36</sub>H<sub>40</sub>O<sub>4</sub>P<sub>2</sub> (598.65): C 72.23, H 6.73; found: C 72.41, H 6.85.

**(*R<sub>P</sub>,R<sub>P</sub>*)-1,2-Bis[(2-benzoyloxyphenyl)(phenyl)phosphino]ethane (2w).**

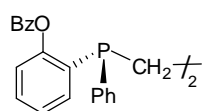

Prepared from (*R<sub>P</sub>,R<sub>P</sub>*)-**1w** (500 mg, 0.75 mmol) according to the general procedure. Colorless crystals (450 mg, 94%): mp 139–141 °C; *R<sub>f</sub>*: 0.36 (hexane/EtOAc 8:2);  $[\alpha]_D^{25}$ : +44.8 (c 1.0 in CHCl<sub>3</sub>); <sup>1</sup>H NMR:  $\delta$  = 1.97 and 2.15 (2 m, 4H; 2 PCH<sub>2</sub>), 7.21 (m, 16H; Ar-H), 7.41 (m, 6H; Ar-H), 7.58 (m, 2H; Ar-H), 7.96 (m, 4H; Ar-H); <sup>13</sup>C NMR:  $\delta$  = 22.5 (m), 122.7, 126.2, 128.3 (m), 128.7, 129.1, 129.9, 130.2, 131.0 (m), 132.2 (m), 132.9 (m), 133.4, 136.6, 153.2 (m), 164.5; <sup>31</sup>P NMR:  $\delta$  = -23.5 (s); MS (FAB): *m/z* (%): 639 (61) [*M*<sup>+</sup>+H]; HR-MS (EI): *m/z* = 638.179, calcd. for C<sub>40</sub>H<sub>32</sub>O<sub>4</sub>P<sub>2</sub> [*M*<sup>+</sup>]: 638.178; anal. calcd. for C<sub>40</sub>H<sub>32</sub>O<sub>4</sub>P<sub>2</sub> (638.63): C 75.23, H 5.05; found: C 75.63, H 5.16.

**(*R<sub>P</sub>,R<sub>P</sub>*)-1,2-Bis[(phenyl)[2-(*p*-tosyloxy)phenyl]phosphino]ethane (2x).**

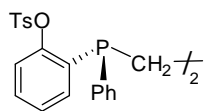

Prepared from (*R<sub>P</sub>,R<sub>P</sub>*)-**1x** (575 mg, 0.75 mmol) according to the general procedure. White solid (530 mg, 96%): *R<sub>f</sub>*: 0.58 (toluene/EtOAc 9:1);  $[\alpha]_D^{25}$ : +10.4 (c 1.0 in CHCl<sub>3</sub>); <sup>1</sup>H NMR:  $\delta$  = 1.88 (m, 4H; 2 PCH<sub>2</sub>), 2.38 (s, 6H; 2 Me), 6.98 (m, 2H; Ar-H), 7.06–7.35 (m, 20H; Ar-H), 7.76 (m, 4H; Ar-H); <sup>13</sup>C NMR:  $\delta$  = 21.6, 22.7 (m), 121.6, 127.0, 128.4 (m), 128.6 (m), 128.7, 129.5, 130.0, 132.3 (m), 132.7 (m), 132.8, 132.9, 136.4 (m), 145.2, 152.3 (m); <sup>31</sup>P NMR:  $\delta$  = -24.7 (s); MS (FAB): *m/z* (%): 739 (36) [*M*<sup>+</sup>+H]; anal. calcd. for C<sub>40</sub>H<sub>36</sub>O<sub>6</sub>P<sub>2</sub>S<sub>2</sub> (738.79): C 65.03, H 4.91; found: C 65.27, H 4.80.

**(*R<sub>P</sub>,R<sub>P</sub>*)-1,2-Bis[(2-(diphenylphosphinyloxy)phenyl)(phenyl)phosphino]ethane (2y).**

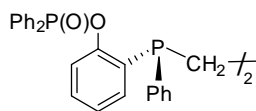

Prepared from (*R<sub>P</sub>,R<sub>P</sub>*)-**1y** (644 mg, 0.75 mmol) according to the general procedure. White solid (610 mg, 98%): *R<sub>f</sub>*: 0.64 (toluene/EtOAc 6:4);  $[\alpha]_D^{25}$ : -3.4 (c 1.0 in CHCl<sub>3</sub>); <sup>1</sup>H NMR:  $\delta$  = 1.96 and 2.16 (m, 4H; 2 PCH<sub>2</sub>), 6.96 (m, 4H; Ar-H), 7.11–7.58 (m, 26H; Ar-H), 7.69 (m, 4H; Ar-H), 7.96 (m, 4H; Ar-H); <sup>13</sup>C NMR:  $\delta$  = 22.6 (m), 119.6 (m), 124.4 (m), 128.1–133.4 (m's), 136.6 (m), 153.8 (m); <sup>31</sup>P NMR:  $\delta$  = -24.4 (s, 2P; PCH<sub>2</sub>), +31.2 (s, 2P; PO); MS (FAB): *m/z* (%): 834 (90) [*M*<sup>+</sup>+H]; anal. calcd. for C<sub>50</sub>H<sub>42</sub>O<sub>4</sub>P<sub>4</sub> (830.76): C 72.29, H 5.10; found: C 72.25, H 5.17.

**In situ Preparation of [Rh((*R<sub>P</sub>,R<sub>P</sub>*)-R-sms-phos)(MeOH)<sub>2</sub>]BF<sub>4</sub> Complex.** To a solution of [Rh(nbd)<sub>2</sub>]BF<sub>4</sub> (2.3 mg, 6.3 μmol) in MeOH (0.5 mL), a solution of the (*R<sub>P</sub>,R<sub>P</sub>*)-R-SMS-phos ligand (0.8 equiv. to Rh-atom) in MeOH (0.5 mL) was added dropwise at r.t. The resulting solution was hydrogenated under 1 bar of H<sub>2</sub> for ca. 15 min. Elimination of metallic rhodium by filtration through a No. 3 sintered-glass filter afforded a clear brown solution of the title complex.

**Hydrogenation Procedure for Substrates in Table 1.** To a solution of the substrate in MeOH, three freeze-pump-thaw cycles were applied and the system was filled with Ar. Then to the substrate solution was added under Ar a solution of the preformed [Rh((*R<sub>P</sub>,R<sub>P</sub>*)-R-sms-phos)(MeOH)<sub>2</sub>]BF<sub>4</sub> solvate in MeOH. A vacuum was applied to this system then it was backfilled with H<sub>2</sub>. The mixture was stirred at the temperature and H<sub>2</sub> pressure as indicated. Progress of the hydrogenation was monitored by the diminution of the volume of the closed reaction system at 1 bar (until H<sub>2</sub> uptake ceased and the colour change of the solution); for reactions at 10 bar (**S7**) analyses were carried out at the indicated times.

The reaction mixture was analyzed by chiral GC (prior to analysis carboxylic groups were esterified with TMSCHN<sub>2</sub> in hexanes). Absolute configurations were assigned by comparison with the literature data of optical rotation of isolated products (90–98% yield) and/or of the *t<sub>R</sub>* on chiral GC.

The following hydrogenation products with the mentioned absolute configuration were obtained using (*R*<sub>p</sub>,*R*<sub>p</sub>)-*R*-SMS-Phos ligands:

**(*S*)-*N*-Acetyl-alanine methyl ester.** <sup>1</sup>H NMR:  $\delta$  = 1.41 (d, *J* = 7 Hz, 3H; CHMe), 2.02 (s, 3H; Ac), 3.76 (s, 3H; CO<sub>2</sub>Me), 4.60 (m, 1H; CH), 6.26 (br s, 1H; NH); [ $\alpha$ ]<sub>D</sub><sup>25</sup>: -91.4 (c 1.0 in H<sub>2</sub>O), >99% ee (*R*-enantiomer: [ $\alpha$ ]<sub>D</sub><sup>25</sup>: +91.2 (c 1.0 in H<sub>2</sub>O)<sup>4</sup>); GC (Lipodex-E), 130 °C: 2.3 min (*S*), 2.6 min (*R*).

**(*S*)-*N*-Acetyl-phenylalanine methyl ester.** <sup>1</sup>H NMR:  $\delta$  = 1.99 (s, 3H; Ac), 3.13 (m, 2H; CH<sub>2</sub>), 3.73 (s, 3H; OMe), 4.90 (dt, *J* = 6 and 8 Hz, 1H; CH), 5.90 (br d, *J* = 6 Hz, 1H; NH), 7.09 (m, 2H; Ar-H), 7.28 (m, 3H; Ar-H); [ $\alpha$ ]<sub>D</sub><sup>25</sup>: +15.7 (c 1.0 in MeOH), >99% ee (*R*-enantiomer: [ $\alpha$ ]<sub>D</sub><sup>25</sup>: -15.8 (c 1.0 in MeOH)<sup>4</sup>); GC (Chiralsil-L-Val), 190 °C: 3.2 min (*R*), 3.4 min (*S*).

**Methyl (*S*)-3-acetamidobutanoate.** <sup>1</sup>H NMR:  $\delta$  = 1.22 (d, *J* = 7 Hz, 1H; CHMe), 1.96 (s, 3H; Ac), 2.52 (dd, *J* = 5 and 16 Hz, 1H; CH<sub>a</sub>H<sub>b</sub>), 2.55 (dd, *J* = 5 and 16 Hz, 1H; CH<sub>a</sub>H<sub>b</sub>), 3.70 (s, 3H; OMe), 4.35 (m, 1H; CH), 6.09 (br s, 1H; NH); [ $\alpha$ ]<sub>D</sub><sup>25</sup>: -17.1 (c 1.4 in MeOH), 80% ee (*R*-enantiomer: [ $\alpha$ ]<sub>D</sub><sup>25</sup>: +21.4 (c 1.4 in MeOH)<sup>5</sup>); GC (CP-Chiralsil-DEX CB), 135 °C: 4.5 min (*S*), 4.7 min (*R*).

**(*S*)-*N*-(1-Phenylethyl)acetamide.** <sup>1</sup>H NMR:  $\delta$  = 1.48 (d, *J* = 6.9 Hz, 3H; CHMe), 1.97 (s, 3H; Ac), 5.12 (m, 1H; CH), 5.84 (br s, 1H; NH), 7.22–7.39 (m, 5H; Ph); [ $\alpha$ ]<sub>D</sub><sup>25</sup>: -145 (c 1.0 in EtOH), >99% ee (*S*-enantiomer: [ $\alpha$ ]<sub>D</sub><sup>25</sup>: -148 (c 2.8 in EtOH)<sup>6</sup>); GC (CP-Chiralsil-DEX CB), 140 °C: 9.9 min (*S*), 10.4 min (*R*).

**(*R*)-2-Methylsuccinic acid dimethyl ester.** <sup>1</sup>H NMR:  $\delta$  = 1.23 (d, *J* = 7 Hz, 3H; CHMe), 2.42 (dd, *J* = 6 and 16 Hz, 1H; CH<sub>a</sub>), 2.75 (dd, *J* = 8 and 16 Hz, 1H; CH<sub>b</sub>), 2.93 (m, 1H; CH), 3.68 (s, 3H; OMe), 3.70 (s, 3H; OMe); [ $\alpha$ ]<sub>D</sub><sup>25</sup>: +4.4 (c 3.0 in CHCl<sub>3</sub>), 91% ee (*R*-enantiomer: [ $\alpha$ ]<sub>D</sub><sup>25</sup>: +4.8 (c 2.9 in CHCl<sub>3</sub>)<sup>7</sup>); GC (Lipodex-E), 80 °C: 8.2 min (*S*), 8.5 min (*R*).

**(*S*)-2-Phenylpropanoic acid.** <sup>1</sup>H NMR:  $\delta$  = 1.52 (d, *J* = 7 Hz, 3H; Me), 3.74 (q, *J* = 7 Hz, 1H; CH), 7.31 (m, 5H; Ph); [ $\alpha$ ]<sub>D</sub><sup>25</sup>: +63.2 (c 1.6 in CHCl<sub>3</sub>), 88% ee (*R*-enantiomer: [ $\alpha$ ]<sub>D</sub><sup>25</sup>: -71.8 (c 1.57 in CHCl<sub>3</sub>)<sup>8</sup>); GC after esterification with TMSCHN<sub>2</sub> (CP-Chiralsil-DEX CB), 90 °C: 16.1 min (*S*), 16.6 min (*R*).

4 M. J. Burk, J. E. Feaster, W. A. Nugent and R. L. Harlow, *J. Am. Chem. Soc.*, 1993, **115**, 10125–10138.

5 G. Zhu, Z. Chen and X. Zhang, *J. Org. Chem.*, 1999, **64**, 6907–6910.

6 B. S. Jursic and S. I. Goldberg, *J. Org. Chem.*, 1992, **57**, 7172–7174.

7 A. Kubo, H. Kubota, M. Takahashi and K. Nunami, *J. Org. Chem.*, 1997, **62**, 5830–5837.

8 C. Spino, C. Beaulieu and J. Lafrenière, *J. Org. Chem.*, 2000, **65**, 7091–7097.
